# Supplementary material for: ScRNA-seq expression of IFI27 and APOC2 identifies four alveolar macrophage superclusters in healthy BALF
Source: Life Sci Alliance. 2022 Jul 12;5(11):e202201458. doi: 10.26508/lsa.202201458 (PMC9275597; doi:10.26508/lsa.202201458)
Supplement: Supplementary file 4 [file LSA-2022-01458_TableS4.xls]

## Sheet: SourceDataForFigure3D4D
	p_val	avg_log2FC	pct.1	pct.2	p_val_adj	cluster	gene
IFI27	0	2.50358	1	0.295	0	AMs.s1	IFI27
APOC2	0	2.11079	1	0.371	0	AMs.s1	APOC2
RPS4X	8.29e-126	0.343867	1	1	2.12e-121	AMs.s1	RPS4X
CST3	4.63e-104	0.298781	1	1	1.18e-99	AMs.s1	CST3
RPL8	6.56e-96	0.254279	1	1	1.68e-91	AMs.s1	RPL8
C1QA	1.22e-91	0.282023	1	1	3.11e-87	AMs.s1	C1QA
FABP4	3.88e-89	0.396	1	0.999	9.91e-85	AMs.s1	FABP4
ALOX5AP	3.62e-88	0.284422	1	0.999	9.25e-84	AMs.s1	ALOX5AP
IFI6	5.4e-86	0.403384	0.992	0.976	1.38e-81	AMs.s1	IFI6
LY6E	1.72e-85	0.319321	0.993	0.977	4.39e-81	AMs.s1	LY6E
HLA-DRA	2.1e-80	0.263307	1	1	5.36e-76	AMs.s1	HLA-DRA
CFD	3.71e-80	0.424761	0.993	0.974	9.47e-76	AMs.s1	CFD
HLA-DPA1	4.37e-79	0.260761	1	1	1.12e-74	AMs.s1	HLA-DPA1
TREM1	1.41e-77	0.277264	0.997	0.987	3.61e-73	AMs.s1	TREM1
HLA-DPB1	1.95e-76	0.251763	1	1	4.99e-72	AMs.s1	HLA-DPB1
CTSC	3.43e-76	0.284363	1	1	8.76e-72	AMs.s1	CTSC
CYBA	9.56e-74	0.250249	1	1	2.44e-69	AMs.s1	CYBA
PYCARD	2.13e-72	0.253931	0.995	0.988	5.43e-68	AMs.s1	PYCARD
LY86	1.41e-65	0.286242	0.952	0.885	3.6e-61	AMs.s1	LY86
BST2	7.5e-63	0.273969	0.982	0.936	1.92e-58	AMs.s1	BST2
HMGN3	1.83e-62	0.253693	0.963	0.914	4.68e-58	AMs.s1	HMGN3
PRSS21	6.73e-60	0.466886	0.552	0.4	1.72e-55	AMs.s1	PRSS21
LGALS3BP	7.21e-60	0.255822	0.975	0.933	1.84e-55	AMs.s1	LGALS3BP
GCA	4.66e-59	0.284033	0.958	0.92	1.19e-54	AMs.s1	GCA
C1QC	1.2e-58	0.317217	1	0.996	3.08e-54	AMs.s1	C1QC
PPIC	9.59e-56	0.282786	0.827	0.708	2.45e-51	AMs.s1	PPIC
BEX3	9.76e-52	0.336887	0.255	0.143	2.49e-47	AMs.s1	BEX3
JUNB	1.85e-49	0.357256	0.907	0.841	4.71e-45	AMs.s1	JUNB
ACOT7	1.39e-48	0.295894	0.758	0.635	3.55e-44	AMs.s1	ACOT7
PARAL1	5.26e-48	0.255383	0.874	0.778	1.34e-43	AMs.s1	PARAL1
HP	5.2e-47	0.411239	0.662	0.535	1.33e-42	AMs.s1	HP
HLA-DRB1	6.71e-47	0.260354	1	1	1.71e-42	AMs.s1	HLA-DRB1
HLA-DRB5	7.88e-46	0.576019	0.892	0.901	2.01e-41	AMs.s1	HLA-DRB5
BEX4	8.68e-45	0.255081	0.853	0.766	2.22e-40	AMs.s1	BEX4
RBP4	1.6e-44	0.550843	0.767	0.691	4.09e-40	AMs.s1	RBP4
NUPR1	3.8e-42	0.297647	0.943	0.891	9.7e-38	AMs.s1	NUPR1
IGFBP2	1.47e-41	0.449509	0.544	0.419	3.76e-37	AMs.s1	IGFBP2
HLA-DQA1	1.41e-38	0.418051	1	0.999	3.6e-34	AMs.s1	HLA-DQA1
RHOB	3.03e-30	0.269184	0.804	0.728	7.74e-26	AMs.s1	RHOB
FOS	5.53e-30	0.251651	0.949	0.911	1.41e-25	AMs.s1	FOS
DUSP1	7.35e-29	0.347131	0.913	0.863	1.88e-24	AMs.s1	DUSP1
IFI271	0	2.63852	0.995	0.253	0	AMs.s2	IFI27
FABP41	1.9e-94	0.273393	1	0.999	4.85e-90	AMs.s2	FABP4
CFD1	1.13e-71	0.2822	0.984	0.973	2.9e-67	AMs.s2	CFD
RBP41	2.42e-56	0.404019	0.738	0.689	6.19e-52	AMs.s2	RBP4
PRSS211	3.51e-49	0.260567	0.475	0.398	8.97e-45	AMs.s2	PRSS21
APOC21	0	2.68047	1	0.313	0	AMs.s3	APOC2
FABP42	5.93e-130	0.288372	1	0.999	1.52e-125	AMs.s3	FABP4
CFD2	5.21e-96	0.253082	0.984	0.973	1.33e-91	AMs.s3	CFD
FOLR3	2.72e-60	0.251001	0.705	0.644	6.95e-56	AMs.s3	FOLR3
HP1	8.93e-59	0.261578	0.599	0.531	2.28e-54	AMs.s3	HP
CXCL9	0	2.83504	0.287	0.039	0	CK.AMs.c1	CXCL9
SOD2	0	2.65058	0.982	0.757	0	CK.AMs.c1	SOD2
C15orf48	0	2.28154	0.766	0.236	0	CK.AMs.c1	C15orf48
CCL23	0	1.60279	0.82	0.445	0	CK.AMs.c1	CCL23
MARCKS	0	1.53034	0.608	0.099	0	CK.AMs.c1	MARCKS
MT2A	0	1.40812	0.935	0.681	0	CK.AMs.c1	MT2A
NCF1	0	1.23899	0.821	0.557	0	CK.AMs.c1	NCF1
TMEM176B	0	1.10927	0.656	0.35	0	CK.AMs.c1	TMEM176B
FYB1	0	1.07292	0.929	0.72	0	CK.AMs.c1	FYB1
APOE	0	1.04107	0.999	0.995	0	CK.AMs.c1	APOE
TNFAIP6	0	1.03571	0.34	0.045	0	CK.AMs.c1	TNFAIP6
S100A8	0	0.997916	0.97	0.927	0	CK.AMs.c1	S100A8
PLTP	0	0.987153	0.467	0.206	0	CK.AMs.c1	PLTP
RARRES1	0	0.95685	0.466	0.124	0	CK.AMs.c1	RARRES1
CD48	0	0.955795	0.576	0.16	0	CK.AMs.c1	CD48
CLEC4E	0	0.915324	0.653	0.378	0	CK.AMs.c1	CLEC4E
SAT1	0	0.912118	1	0.996	0	CK.AMs.c1	SAT1
CEBPD	0	0.901836	0.685	0.414	0	CK.AMs.c1	CEBPD
SLC39A8	0	0.835761	0.415	0.046	0	CK.AMs.c1	SLC39A8
TMEM176A	0	0.834053	0.54	0.249	0	CK.AMs.c1	TMEM176A
AQP9	0	0.833926	0.728	0.348	0	CK.AMs.c1	AQP9
CXCR4	0	0.824542	0.544	0.206	0	CK.AMs.c1	CXCR4
CPM	0	0.815674	0.896	0.751	0	CK.AMs.c1	CPM
SLAMF8	0	0.800064	0.733	0.381	0	CK.AMs.c1	SLAMF8
CD84	0	0.786	0.704	0.427	0	CK.AMs.c1	CD84
ZFP36L1	0	0.76035	0.814	0.571	0	CK.AMs.c1	ZFP36L1
ABCA1	0	0.724516	0.634	0.339	0	CK.AMs.c1	ABCA1
MT1E	0	0.702604	0.328	0.084	0	CK.AMs.c1	MT1E
LYZ	0	0.684458	1	1	0	CK.AMs.c1	LYZ
GPX3	0	0.675708	0.502	0.211	0	CK.AMs.c1	GPX3
PDE4DIP	0	0.668593	0.873	0.718	0	CK.AMs.c1	PDE4DIP
FPR3	0	0.663703	0.557	0.276	0	CK.AMs.c1	FPR3
C3	0	0.653826	0.347	0.055	0	CK.AMs.c1	C3
SRGN	0	0.630829	1	0.999	0	CK.AMs.c1	SRGN
LILRB4	0	0.602098	0.5	0.208	0	CK.AMs.c1	LILRB4
HLA-A	0	0.570071	1	0.999	0	CK.AMs.c1	HLA-A
IL4I1	0	0.556118	0.342	0.055	0	CK.AMs.c1	IL4I1
CTSS	0	0.544416	1	1	0	CK.AMs.c1	CTSS
PSTPIP2	0	0.542612	0.404	0.112	0	CK.AMs.c1	PSTPIP2
PLEKHO1	0	0.533106	0.469	0.221	0	CK.AMs.c1	PLEKHO1
NINJ1	0	0.527162	0.503	0.221	0	CK.AMs.c1	NINJ1
PSAP	0	0.521362	1	1	0	CK.AMs.c1	PSAP
SLAMF7	0	0.501736	0.279	0.033	0	CK.AMs.c1	SLAMF7
MT1X	0	0.463354	0.324	0.093	0	CK.AMs.c1	MT1X
LILRB2	0	0.462724	0.442	0.19	0	CK.AMs.c1	LILRB2
FTH1	0	0.459329	1	1	0	CK.AMs.c1	FTH1
CD72	0	0.403956	0.342	0.129	0	CK.AMs.c1	CD72
SERPINF1	0	0.339822	0.259	0.08	0	CK.AMs.c1	SERPINF1
SLC30A1	0	0.325575	0.304	0.098	0	CK.AMs.c1	SLC30A1
RELB	0	0.300659	0.262	0.075	0	CK.AMs.c1	RELB
CCL4L2	2.84e-307	0.308992	0.344	0.131	7.26e-303	CK.AMs.c1	CCL4L2
FGL2	9e-305	0.583514	0.448	0.21	2.3e-300	CK.AMs.c1	FGL2
HLA-F	6.25e-304	0.610449	0.925	0.834	1.6e-299	CK.AMs.c1	HLA-F
RASSF4	1.85e-303	0.649893	0.702	0.472	4.73e-299	CK.AMs.c1	RASSF4
ATOX1	6.73e-302	0.596575	0.981	0.962	1.72e-297	CK.AMs.c1	ATOX1
CD14	1.95e-301	0.862594	0.873	0.715	4.99e-297	CK.AMs.c1	CD14
ADA2	4.6e-295	0.559721	0.922	0.806	1.18e-290	CK.AMs.c1	ADA2
PEA15	5.07e-294	0.509291	0.589	0.336	1.29e-289	CK.AMs.c1	PEA15
CXCL5	9.4e-292	1.13438	0.445	0.213	2.4e-287	CK.AMs.c1	CXCL5
SNX10	1.03e-281	0.563332	0.995	0.995	2.63e-277	CK.AMs.c1	SNX10
HLA-B	3.38e-276	0.472582	1	1	8.63e-272	CK.AMs.c1	HLA-B
PNRC1	3.13e-269	0.537155	0.966	0.906	8e-265	CK.AMs.c1	PNRC1
KCNMA1	2.62e-267	0.644099	0.647	0.409	6.68e-263	CK.AMs.c1	KCNMA1
NUPR11	1.06e-265	0.759588	0.953	0.89	2.7e-261	CK.AMs.c1	NUPR1
SLC1A3	1.83e-265	0.536051	0.498	0.268	4.66e-261	CK.AMs.c1	SLC1A3
TNFAIP2	3.33e-265	0.592133	0.894	0.759	8.5e-261	CK.AMs.c1	TNFAIP2
MMP2-AS1	9.84e-263	0.445534	0.347	0.148	2.51e-258	CK.AMs.c1	MMP2-AS1
HMOX1	1.12e-260	0.636005	0.891	0.778	2.85e-256	CK.AMs.c1	HMOX1
A2M	1.23e-252	0.463334	0.348	0.151	3.14e-248	CK.AMs.c1	A2M
DOCK4	3.01e-238	0.379157	0.392	0.186	7.7e-234	CK.AMs.c1	DOCK4
MAFB	4.47e-231	0.613321	0.667	0.444	1.14e-226	CK.AMs.c1	MAFB
AOAH	1.96e-227	0.412657	0.473	0.255	5e-223	CK.AMs.c1	AOAH
C1orf54	2.49e-223	0.531385	0.392	0.197	6.35e-219	CK.AMs.c1	C1orf54
LHFPL2	3.61e-222	0.492403	0.587	0.366	9.23e-218	CK.AMs.c1	LHFPL2
KLHL5	7.35e-220	0.251538	0.265	0.102	1.88e-215	CK.AMs.c1	KLHL5
CALHM6	3.72e-218	0.456432	0.469	0.259	9.51e-214	CK.AMs.c1	CALHM6
EVA1B	4.83e-218	0.37683	0.422	0.216	1.23e-213	CK.AMs.c1	EVA1B
GPR155	1.51e-214	0.341843	0.295	0.124	3.86e-210	CK.AMs.c1	GPR155
VAMP5	2.4e-211	0.804976	0.515	0.315	6.12e-207	CK.AMs.c1	VAMP5
CD36	8.99e-210	0.582445	0.502	0.283	2.3e-205	CK.AMs.c1	CD36
NAP1L1	3.94e-209	0.405642	0.998	0.99	1.01e-204	CK.AMs.c1	NAP1L1
TYMP	3.35e-204	0.464104	0.963	0.92	8.55e-200	CK.AMs.c1	TYMP
NPL	1.4e-203	0.46838	0.68	0.481	3.58e-199	CK.AMs.c1	NPL
LIPA	5.56e-201	0.633889	0.924	0.823	1.42e-196	CK.AMs.c1	LIPA
NR1H3	2.71e-199	0.521673	0.567	0.361	6.91e-195	CK.AMs.c1	NR1H3
C17orf49	1.2e-195	0.456518	0.766	0.595	3.08e-191	CK.AMs.c1	C17orf49
ATF5	7.23e-195	0.328995	0.38	0.191	1.85e-190	CK.AMs.c1	ATF5
CTSH	3.5e-193	0.469969	0.984	0.961	8.94e-189	CK.AMs.c1	CTSH
SMAP2	2.83e-191	0.484198	0.822	0.692	7.23e-187	CK.AMs.c1	SMAP2
TNFRSF1B	4.14e-191	0.379299	0.539	0.327	1.06e-186	CK.AMs.c1	TNFRSF1B
METTL7A	8.75e-189	0.267407	0.274	0.117	2.23e-184	CK.AMs.c1	METTL7A
2022-03-01	3.57e-186	0.425247	0.897	0.778	9.12e-182	CK.AMs.c1	2022-03-01
FCGR3A	2.87e-185	0.40405	0.997	0.986	7.33e-181	CK.AMs.c1	FCGR3A
FCHO2	4.59e-183	0.450821	0.791	0.639	1.17e-178	CK.AMs.c1	FCHO2
KCTD12	5.11e-182	0.447829	0.924	0.836	1.31e-177	CK.AMs.c1	KCTD12
ITGB2	7.61e-180	0.391272	0.984	0.961	1.94e-175	CK.AMs.c1	ITGB2
AC020656.1	4.75e-179	0.484632	0.957	0.885	1.21e-174	CK.AMs.c1	AC020656.1
TLR8	9.23e-179	0.407861	0.623	0.421	2.36e-174	CK.AMs.c1	TLR8
TLR2	1.34e-178	0.287494	0.335	0.162	3.43e-174	CK.AMs.c1	TLR2
KYNU	1.45e-177	0.561493	0.745	0.611	3.7e-173	CK.AMs.c1	KYNU
CCL18	2.08e-173	1.22665	0.868	0.755	5.3e-169	CK.AMs.c1	CCL18
LINC01857	2.3e-172	0.285039	0.311	0.146	5.88e-168	CK.AMs.c1	LINC01857
NIBAN1	5.54e-171	0.469036	0.846	0.725	1.42e-166	CK.AMs.c1	NIBAN1
TNFSF13B	3.85e-169	0.49157	0.863	0.786	9.84e-165	CK.AMs.c1	TNFSF13B
IL18	1.03e-168	0.516255	0.84	0.738	2.63e-164	CK.AMs.c1	IL18
NOTCH2	1.25e-167	0.386096	0.605	0.414	3.18e-163	CK.AMs.c1	NOTCH2
P2RX7	1.75e-167	0.382614	0.588	0.394	4.47e-163	CK.AMs.c1	P2RX7
LILRB1	3.21e-165	0.428449	0.651	0.467	8.2e-161	CK.AMs.c1	LILRB1
APOC1	1.72e-164	0.448881	1	1	4.41e-160	CK.AMs.c1	APOC1
PDK4	2.85e-164	0.560852	0.733	0.58	7.29e-160	CK.AMs.c1	PDK4
HLA-DPA11	9.05e-164	0.3365	1	1	2.31e-159	CK.AMs.c1	HLA-DPA1
HIF1A	1.84e-163	0.48324	0.595	0.411	4.7e-159	CK.AMs.c1	HIF1A
CTSB	1.25e-160	0.414409	0.998	0.994	3.2e-156	CK.AMs.c1	CTSB
PRCP	1.61e-160	0.362529	0.511	0.317	4.12e-156	CK.AMs.c1	PRCP
CPVL	4.15e-160	0.467402	0.933	0.873	1.06e-155	CK.AMs.c1	CPVL
S100A9	2.05e-159	0.551029	0.997	0.997	5.23e-155	CK.AMs.c1	S100A9
BLVRB	4.22e-157	0.423188	0.891	0.791	1.08e-152	CK.AMs.c1	BLVRB
AKR1B1	2.04e-154	0.438059	0.866	0.753	5.21e-150	CK.AMs.c1	AKR1B1
BCAT1	3.89e-154	0.318716	0.34	0.175	9.93e-150	CK.AMs.c1	BCAT1
RNF144B	1.39e-151	0.365519	0.522	0.335	3.56e-147	CK.AMs.c1	RNF144B
MCTP1	8.14e-148	0.406771	0.518	0.34	2.08e-143	CK.AMs.c1	MCTP1
NFAM1	4.47e-147	0.263996	0.371	0.2	1.14e-142	CK.AMs.c1	NFAM1
ACO1	3.06e-142	0.431914	0.907	0.835	7.82e-138	CK.AMs.c1	ACO1
LINC01094	4.92e-141	0.423937	0.734	0.587	1.26e-136	CK.AMs.c1	LINC01094
RAP2B	3.23e-139	0.375122	0.733	0.585	8.26e-135	CK.AMs.c1	RAP2B
GBP5	4.27e-139	0.441482	0.405	0.245	1.09e-134	CK.AMs.c1	GBP5
MMP14	6.91e-139	0.268109	0.327	0.172	1.76e-134	CK.AMs.c1	MMP14
SQSTM1	1.19e-134	0.372103	0.948	0.905	3.04e-130	CK.AMs.c1	SQSTM1
HLA-DPB11	2.24e-134	0.329674	1	1	5.73e-130	CK.AMs.c1	HLA-DPB1
STAT1	3.7e-134	0.613275	0.858	0.791	9.46e-130	CK.AMs.c1	STAT1
DMXL2	6.16e-133	0.401781	0.752	0.616	1.57e-128	CK.AMs.c1	DMXL2
SORL1	2.33e-132	0.350363	0.509	0.332	5.95e-128	CK.AMs.c1	SORL1
NPC2	6.23e-132	0.293131	1	0.999	1.59e-127	CK.AMs.c1	NPC2
LY96	1.79e-131	0.322291	0.963	0.927	4.56e-127	CK.AMs.c1	LY96
NCOA4	4.99e-131	0.349	0.89	0.812	1.28e-126	CK.AMs.c1	NCOA4
HLA-E	1.33e-129	0.301686	0.992	0.982	3.39e-125	CK.AMs.c1	HLA-E
ACP2	6.68e-128	0.349692	0.552	0.382	1.7e-123	CK.AMs.c1	ACP2
MALAT1	1.17e-127	0.465873	0.995	0.992	2.99e-123	CK.AMs.c1	MALAT1
PSME2	1.24e-127	0.453881	0.964	0.948	3.17e-123	CK.AMs.c1	PSME2
IGFLR1	1.63e-126	0.347687	0.552	0.382	4.15e-122	CK.AMs.c1	IGFLR1
STOM	7.18e-125	0.381055	0.881	0.798	1.83e-120	CK.AMs.c1	STOM
FMNL2	6.02e-124	0.361932	0.818	0.69	1.54e-119	CK.AMs.c1	FMNL2
RGS1	2.13e-123	0.587437	0.458	0.297	5.44e-119	CK.AMs.c1	RGS1
RGS2	2.27e-123	0.430878	0.417	0.257	5.81e-119	CK.AMs.c1	RGS2
CREBL2	5.79e-123	0.34099	0.633	0.474	1.48e-118	CK.AMs.c1	CREBL2
SMCO4	6.19e-123	0.336102	0.946	0.905	1.58e-118	CK.AMs.c1	SMCO4
EPB41L3	2.88e-122	0.368658	0.709	0.563	7.37e-118	CK.AMs.c1	EPB41L3
IFNGR2	1.13e-121	0.402377	0.815	0.722	2.88e-117	CK.AMs.c1	IFNGR2
ITPR1	2.97e-121	0.318337	0.511	0.342	7.58e-117	CK.AMs.c1	ITPR1
SLC8A1	5.71e-121	0.34672	0.796	0.664	1.46e-116	CK.AMs.c1	SLC8A1
CYB5A	1.49e-120	0.363729	0.934	0.896	3.82e-116	CK.AMs.c1	CYB5A
PLAAT4	1.74e-120	0.432677	0.616	0.471	4.44e-116	CK.AMs.c1	PLAAT4
IL10RA	1.98e-120	0.323813	0.617	0.451	5.05e-116	CK.AMs.c1	IL10RA
PRDX1	3.75e-116	0.336542	0.999	0.998	9.58e-112	CK.AMs.c1	PRDX1
SPARC	7.52e-114	0.396471	0.697	0.538	1.92e-109	CK.AMs.c1	SPARC
CFD3	6.96e-112	0.510014	0.991	0.973	1.78e-107	CK.AMs.c1	CFD
VMP1	4.4e-110	0.409808	0.845	0.748	1.12e-105	CK.AMs.c1	VMP1
ADGRE1	6.95e-110	0.333594	0.49	0.332	1.77e-105	CK.AMs.c1	ADGRE1
ELL2	4.02e-107	0.331013	0.62	0.472	1.03e-102	CK.AMs.c1	ELL2
JAK1	6.77e-107	0.321329	0.885	0.811	1.73e-102	CK.AMs.c1	JAK1
VMO1	8.14e-107	0.489859	0.867	0.783	2.08e-102	CK.AMs.c1	VMO1
TAPBP	1.29e-106	0.325337	0.932	0.88	3.3e-102	CK.AMs.c1	TAPBP
C3AR1	4.36e-106	0.350189	0.701	0.548	1.11e-101	CK.AMs.c1	C3AR1
TBC1D2B	8.27e-106	0.26843	0.424	0.272	2.11e-101	CK.AMs.c1	TBC1D2B
LGALS1	1.76e-104	0.272662	0.999	0.999	4.49e-100	CK.AMs.c1	LGALS1
GNB4	6.65e-104	0.33486	0.792	0.681	1.7e-99	CK.AMs.c1	GNB4
EEF1B2	3.85e-103	0.256733	0.999	0.997	9.84e-99	CK.AMs.c1	EEF1B2
GBP2	5.63e-103	0.367902	0.731	0.616	1.44e-98	CK.AMs.c1	GBP2
WARS	1.95e-102	0.456939	0.778	0.678	4.98e-98	CK.AMs.c1	WARS
TSPAN4	2.01e-99	0.354326	0.706	0.568	5.14e-95	CK.AMs.c1	TSPAN4
CTSL	4.62e-99	0.526063	0.988	0.983	1.18e-94	CK.AMs.c1	CTSL
DSE	6.23e-99	0.352384	0.819	0.727	1.59e-94	CK.AMs.c1	DSE
PTPRJ	2.37e-98	0.267572	0.483	0.332	6.05e-94	CK.AMs.c1	PTPRJ
GPR65	1.17e-96	0.415894	0.759	0.665	2.99e-92	CK.AMs.c1	GPR65
CD44	2.31e-96	0.299353	0.991	0.974	5.9e-92	CK.AMs.c1	CD44
HLA-DMB	2.67e-96	0.330148	0.963	0.944	6.83e-92	CK.AMs.c1	HLA-DMB
ZEB2	2.96e-95	0.322545	0.953	0.92	7.55e-91	CK.AMs.c1	ZEB2
BMP2K	6.14e-95	0.316602	0.62	0.481	1.57e-90	CK.AMs.c1	BMP2K
MTHFD2	1.32e-92	0.295129	0.578	0.433	3.38e-88	CK.AMs.c1	MTHFD2
JPT1	2.92e-92	0.270861	0.993	0.986	7.47e-88	CK.AMs.c1	JPT1
MT1F	1.22e-91	0.343828	0.368	0.236	3.11e-87	CK.AMs.c1	MT1F
HLA-DRA1	1.55e-91	0.254316	1	1	3.95e-87	CK.AMs.c1	HLA-DRA
TIMP1	3.91e-91	0.578381	0.881	0.814	9.98e-87	CK.AMs.c1	TIMP1
IFI16	2.1e-89	0.284665	0.916	0.861	5.37e-85	CK.AMs.c1	IFI16
CD82	2.38e-89	0.288767	0.533	0.393	6.08e-85	CK.AMs.c1	CD82
HERPUD1	9.36e-89	0.299929	0.833	0.737	2.39e-84	CK.AMs.c1	HERPUD1
CXXC5	3.07e-88	0.264669	0.579	0.431	7.84e-84	CK.AMs.c1	CXXC5
RHOQ	6.26e-88	0.309217	0.852	0.78	1.6e-83	CK.AMs.c1	RHOQ
GPNMB	2.05e-85	0.270682	0.998	0.992	5.23e-81	CK.AMs.c1	GPNMB
KLHDC8B	6.15e-85	0.298218	0.478	0.339	1.57e-80	CK.AMs.c1	KLHDC8B
PSD3	8.36e-85	0.292024	0.528	0.386	2.13e-80	CK.AMs.c1	PSD3
RUFY3	1.93e-84	0.264206	0.553	0.412	4.93e-80	CK.AMs.c1	RUFY3
PLD3	2.25e-84	0.329765	0.869	0.795	5.74e-80	CK.AMs.c1	PLD3
SLC46A3	2.48e-84	0.254311	0.515	0.374	6.33e-80	CK.AMs.c1	SLC46A3
GADD45B	3.8e-84	0.260016	0.42	0.279	9.7e-80	CK.AMs.c1	GADD45B
GBP4	2.75e-80	0.335274	0.585	0.462	7.02e-76	CK.AMs.c1	GBP4
LAP3	3.38e-80	0.305338	0.924	0.884	8.63e-76	CK.AMs.c1	LAP3
DICER1	2.33e-79	0.288103	0.773	0.672	5.95e-75	CK.AMs.c1	DICER1
DPYD	5.62e-77	0.255848	0.652	0.523	1.44e-72	CK.AMs.c1	DPYD
SERPING1	2.42e-76	0.257001	0.985	0.972	6.18e-72	CK.AMs.c1	SERPING1
KMO	9.91e-76	0.300848	0.682	0.56	2.53e-71	CK.AMs.c1	KMO
GM2A	2.7e-74	0.285049	0.867	0.789	6.89e-70	CK.AMs.c1	GM2A
GLUL	3.27e-74	0.28934	1	0.998	8.35e-70	CK.AMs.c1	GLUL
CREBRF	3.74e-74	0.283677	0.762	0.655	9.56e-70	CK.AMs.c1	CREBRF
B4GALT1	9e-74	0.265658	0.642	0.524	2.3e-69	CK.AMs.c1	B4GALT1
SMS	1.18e-73	0.258077	0.849	0.779	3.03e-69	CK.AMs.c1	SMS
GBP1	1.25e-72	0.506724	0.759	0.706	3.2e-68	CK.AMs.c1	GBP1
SEC22B	3.33e-72	0.250158	0.706	0.597	8.52e-68	CK.AMs.c1	SEC22B
EVI2A	2.89e-71	0.299704	0.747	0.649	7.38e-67	CK.AMs.c1	EVI2A
PLPP3	3.9e-71	0.26804	0.381	0.261	9.96e-67	CK.AMs.c1	PLPP3
GNS	3.23e-70	0.254848	0.861	0.799	8.26e-66	CK.AMs.c1	GNS
BTG1	1.4e-67	0.297201	0.961	0.944	3.59e-63	CK.AMs.c1	BTG1
SGK1	1.74e-67	0.341879	0.574	0.452	4.45e-63	CK.AMs.c1	SGK1
PSMB9	9.48e-67	0.341784	0.89	0.863	2.42e-62	CK.AMs.c1	PSMB9
LIMS1	8.99e-66	0.270035	0.84	0.768	2.3e-61	CK.AMs.c1	LIMS1
PPIF	9.06e-66	0.272166	0.48	0.362	2.31e-61	CK.AMs.c1	PPIF
TNFRSF14	1.06e-63	0.250558	0.591	0.473	2.71e-59	CK.AMs.c1	TNFRSF14
DRAM1	2.69e-63	0.286266	0.695	0.6	6.87e-59	CK.AMs.c1	DRAM1
ACSL1	9.24e-63	0.444009	0.589	0.498	2.36e-58	CK.AMs.c1	ACSL1
PABPC4	1.17e-62	0.250489	0.715	0.614	2.99e-58	CK.AMs.c1	PABPC4
TNIK	4.14e-62	0.293619	0.481	0.369	1.06e-57	CK.AMs.c1	TNIK
ZFAND5	1.29e-57	0.260185	0.932	0.9	3.3e-53	CK.AMs.c1	ZFAND5
CXCL2	3.95e-55	0.337118	0.403	0.297	1.01e-50	CK.AMs.c1	CXCL2
DUSP11	4.22e-55	0.278609	0.912	0.862	1.08e-50	CK.AMs.c1	DUSP1
LGMN	9.48e-55	0.301878	0.393	0.287	2.42e-50	CK.AMs.c1	LGMN
FPR1	3.82e-54	0.300194	0.639	0.542	9.76e-50	CK.AMs.c1	FPR1
FTX	1.87e-51	0.267541	0.636	0.533	4.77e-47	CK.AMs.c1	FTX
NEAT1	6.18e-48	0.324947	0.965	0.946	1.58e-43	CK.AMs.c1	NEAT1
LYN	6.1e-44	0.287187	0.871	0.843	1.56e-39	CK.AMs.c1	LYN
HLA-DQB2	5.55e-25	0.264431	0.582	0.513	1.42e-20	CK.AMs.c1	HLA-DQB2
NAMPT	9.74e-21	0.282874	0.896	0.891	2.49e-16	CK.AMs.c1	NAMPT
HLA-DQA2	2.85e-15	0.316214	0.673	0.65	7.28e-11	CK.AMs.c1	HLA-DQA2
ITGB8	3.39e-14	0.292325	0.479	0.441	8.66e-10	CK.AMs.c1	ITGB8
CCL4	0	5.32874	0.933	0.087	0	CK.AMs.c2	CCL4
CCL4L21	0	4.15762	0.906	0.122	0	CK.AMs.c2	CCL4L2
CCL20	0	4.05521	0.708	0.032	0	CK.AMs.c2	CCL20
CCL3	0	3.27062	0.644	0.04	0	CK.AMs.c2	CCL3
CXCL8	0	3.13463	0.677	0.092	0	CK.AMs.c2	CXCL8
IL1B	0	2.934	0.741	0.412	0	CK.AMs.c2	IL1B
SOD21	0	2.7972	0.998	0.76	0	CK.AMs.c2	SOD2
MARCKS1	0	2.68967	0.875	0.102	0	CK.AMs.c2	MARCKS
TNIP3	0	2.54684	0.71	0.047	0	CK.AMs.c2	TNIP3
TNFAIP61	0	2.50242	0.706	0.041	0	CK.AMs.c2	TNFAIP6
G0S2	0	2.10704	0.401	0.081	0	CK.AMs.c2	G0S2
CXCL10	0	1.9501	0.275	0.049	0	CK.AMs.c2	CXCL10
TNFAIP3	0	1.76484	0.844	0.411	0	CK.AMs.c2	TNFAIP3
C15orf481	0	1.6808	0.645	0.248	0	CK.AMs.c2	C15orf48
MIR3945HG	0	1.5946	0.796	0.406	0	CK.AMs.c2	MIR3945HG
ACSL11	0	1.51104	0.831	0.494	0	CK.AMs.c2	ACSL1
PLEK	0	1.50182	0.986	0.893	0	CK.AMs.c2	PLEK
NFKBIA	0	1.49539	0.958	0.804	0	CK.AMs.c2	NFKBIA
IL1A	0	1.46895	0.534	0.225	0	CK.AMs.c2	IL1A
PNRC11	0	1.45235	0.988	0.907	0	CK.AMs.c2	PNRC1
CCL3L1	0	1.45126	0.34	0.032	0	CK.AMs.c2	CCL3L1
NAMPT1	0	1.37805	0.989	0.889	0	CK.AMs.c2	NAMPT
ITGB81	0	1.33203	0.781	0.435	0	CK.AMs.c2	ITGB8
ICAM1	0	1.33054	0.694	0.158	0	CK.AMs.c2	ICAM1
NINJ11	0	1.24487	0.742	0.22	0	CK.AMs.c2	NINJ1
SLC1A31	0	1.23195	0.714	0.267	0	CK.AMs.c2	SLC1A3
IER3	0	1.20513	0.621	0.29	0	CK.AMs.c2	IER3
RNF144B1	0	1.16186	0.784	0.332	0	CK.AMs.c2	RNF144B
AQP91	0	1.16008	0.786	0.354	0	CK.AMs.c2	AQP9
CD83	0	1.12853	0.914	0.694	0	CK.AMs.c2	CD83
GBP11	0	1.12823	0.902	0.704	0	CK.AMs.c2	GBP1
TNFAIP21	0	1.12101	0.93	0.76	0	CK.AMs.c2	TNFAIP2
DRAM11	0	1.08003	0.87	0.598	0	CK.AMs.c2	DRAM1
IFNGR21	0	1.06961	0.925	0.721	0	CK.AMs.c2	IFNGR2
KYNU1	0	1.06893	0.855	0.611	0	CK.AMs.c2	KYNU
NBN	0	1.04484	0.846	0.568	0	CK.AMs.c2	NBN
SAT11	0	1.04302	1	0.996	0	CK.AMs.c2	SAT1
SLC39A81	0	1.03931	0.442	0.052	0	CK.AMs.c2	SLC39A8
BCL2A1	0	1.02495	0.99	0.912	0	CK.AMs.c2	BCL2A1
UGCG	0	0.997378	0.794	0.467	0	CK.AMs.c2	UGCG
SDC4	0	0.957781	0.591	0.166	0	CK.AMs.c2	SDC4
SAMSN1	0	0.946026	0.752	0.418	0	CK.AMs.c2	SAMSN1
NFKB1	0	0.942989	0.765	0.441	0	CK.AMs.c2	NFKB1
SNX101	0	0.908805	1	0.995	0	CK.AMs.c2	SNX10
FPR11	0	0.908213	0.823	0.54	0	CK.AMs.c2	FPR1
DSE1	0	0.904978	0.914	0.726	0	CK.AMs.c2	DSE
PSTPIP21	0	0.823892	0.5	0.115	0	CK.AMs.c2	PSTPIP2
NFE2L2	0	0.796615	0.964	0.847	0	CK.AMs.c2	NFE2L2
PIM3	0	0.785103	0.664	0.336	0	CK.AMs.c2	PIM3
RNF19B	0	0.77668	0.62	0.265	0	CK.AMs.c2	RNF19B
CD481	0	0.773069	0.512	0.169	0	CK.AMs.c2	CD48
EHD1	0	0.756225	0.554	0.175	0	CK.AMs.c2	EHD1
SRGN1	0	0.74273	1	0.999	0	CK.AMs.c2	SRGN
SLC2A6	0	0.740031	0.59	0.205	0	CK.AMs.c2	SLC2A6
DUSP2	0	0.735016	0.254	0.042	0	CK.AMs.c2	DUSP2
SHROOM3	0	0.729198	0.335	0.054	0	CK.AMs.c2	SHROOM3
BIRC3	0	0.711233	0.43	0.09	0	CK.AMs.c2	BIRC3
BCL3	0	0.674247	0.484	0.121	0	CK.AMs.c2	BCL3
RELB1	0	0.663103	0.473	0.073	0	CK.AMs.c2	RELB
GCH1	0	0.657654	0.425	0.062	0	CK.AMs.c2	GCH1
TLR21	0	0.62382	0.485	0.161	0	CK.AMs.c2	TLR2
NFKBIE	0	0.540301	0.501	0.191	0	CK.AMs.c2	NFKBIE
IL4I11	0	0.487468	0.321	0.061	0	CK.AMs.c2	IL4I1
NFKB2	0	0.453584	0.325	0.031	0	CK.AMs.c2	NFKB2
CCRL2	7.03e-308	0.72983	0.672	0.348	1.8e-303	CK.AMs.c2	CCRL2
B4GALT11	1.84e-298	0.784271	0.796	0.523	4.71e-294	CK.AMs.c2	B4GALT1
SQSTM11	8.32e-287	0.737374	0.979	0.905	2.13e-282	CK.AMs.c2	SQSTM1
C3AR11	3.4e-281	0.866686	0.814	0.548	8.69e-277	CK.AMs.c2	C3AR1
BCL6	4.84e-281	0.635308	0.572	0.263	1.24e-276	CK.AMs.c2	BCL6
CD141	4.78e-279	0.965849	0.916	0.717	1.22e-274	CK.AMs.c2	CD14
CXCL51	9.3e-275	1.38988	0.509	0.216	2.38e-270	CK.AMs.c2	CXCL5
ZC3H12A	1.94e-271	0.391483	0.293	0.081	4.95e-267	CK.AMs.c2	ZC3H12A
PPIF1	5.29e-271	0.79724	0.658	0.36	1.35e-266	CK.AMs.c2	PPIF
ABCA11	2.14e-266	0.853757	0.666	0.344	5.45e-262	CK.AMs.c2	ABCA1
PDE4B	2.82e-264	0.669497	0.504	0.217	7.19e-260	CK.AMs.c2	PDE4B
TUT1	5.59e-261	0.383236	0.321	0.097	1.43e-256	CK.AMs.c2	TUT1
LIMK2	7.99e-260	0.518553	0.494	0.206	2.04e-255	CK.AMs.c2	LIMK2
CCL231	2.46e-258	1.21744	0.735	0.454	6.29e-254	CK.AMs.c2	CCL23
EIF1	2.67e-257	0.468419	1	1	6.82e-253	CK.AMs.c2	EIF1
KMO1	8.29e-253	0.750952	0.811	0.559	2.12e-248	CK.AMs.c2	KMO
MTF1	1.64e-250	0.580364	0.548	0.255	4.18e-246	CK.AMs.c2	MTF1
GRAMD1A	1.48e-248	0.491952	0.435	0.17	3.78e-244	CK.AMs.c2	GRAMD1A
NCF11	1.86e-245	1.21833	0.784	0.562	4.76e-241	CK.AMs.c2	NCF1
CXCL3	4.21e-237	1.65211	0.776	0.592	1.08e-232	CK.AMs.c2	CXCL3
LYN1	1.03e-227	0.748088	0.94	0.841	2.64e-223	CK.AMs.c2	LYN
IL181	5.11e-224	0.757549	0.895	0.739	1.31e-219	CK.AMs.c2	IL18
MT2A1	5.83e-224	0.971968	0.883	0.687	1.49e-219	CK.AMs.c2	MT2A
IL1RN	1.67e-217	1.26285	0.686	0.455	4.25e-213	CK.AMs.c2	IL1RN
MAFB1	5.47e-214	0.830593	0.712	0.447	1.4e-209	CK.AMs.c2	MAFB
STOM1	5.19e-209	0.652517	0.937	0.798	1.33e-204	CK.AMs.c2	STOM
GADD45B1	2.14e-208	0.851814	0.537	0.279	5.46e-204	CK.AMs.c2	GADD45B
B4GALT5	3.16e-208	0.636218	0.657	0.399	8.07e-204	CK.AMs.c2	B4GALT5
TNF	1.13e-206	0.55536	0.301	0.101	2.9e-202	CK.AMs.c2	TNF
SLAMF81	1.45e-200	0.583693	0.662	0.389	3.7e-196	CK.AMs.c2	SLAMF8
LYZ1	1.96e-195	0.61916	1	1	5e-191	CK.AMs.c2	LYZ
CXCL21	2.84e-193	0.970812	0.553	0.295	7.26e-189	CK.AMs.c2	CXCL2
CLEC4E1	3.73e-190	0.811583	0.639	0.383	9.52e-186	CK.AMs.c2	CLEC4E
CD274	1.64e-188	0.608158	0.543	0.288	4.19e-184	CK.AMs.c2	CD274
S100A81	1.81e-183	0.859779	0.982	0.927	4.62e-179	CK.AMs.c2	S100A8
FYB11	4.95e-183	0.670924	0.876	0.725	1.27e-178	CK.AMs.c2	FYB1
PLK3	1.41e-181	0.359229	0.341	0.132	3.6e-177	CK.AMs.c2	PLK3
LACC1	1.47e-181	0.46798	0.491	0.241	3.76e-177	CK.AMs.c2	LACC1
MTHFD21	1.61e-179	0.588887	0.672	0.434	4.12e-175	CK.AMs.c2	MTHFD2
BTG3	2.89e-179	0.495766	0.543	0.287	7.38e-175	CK.AMs.c2	BTG3
WTAP	1.05e-176	0.572967	0.776	0.569	2.68e-172	CK.AMs.c2	WTAP
PDE4DIP1	1.74e-175	0.637451	0.877	0.721	4.44e-171	CK.AMs.c2	PDE4DIP
OTUD1	1.52e-173	0.680506	0.623	0.382	3.89e-169	CK.AMs.c2	OTUD1
FTH11	1.35e-171	0.383248	1	1	3.44e-167	CK.AMs.c2	FTH1
ZFP36L11	1.61e-170	0.762253	0.776	0.576	4.12e-166	CK.AMs.c2	ZFP36L1
PLTP1	4.11e-169	0.718648	0.443	0.211	1.05e-164	CK.AMs.c2	PLTP
PTPN2	1.39e-168	0.577569	0.818	0.652	3.54e-164	CK.AMs.c2	PTPN2
ATP2B1	6.43e-166	0.704055	0.909	0.805	1.64e-161	CK.AMs.c2	ATP2B1
TIFA	1.39e-164	0.470202	0.403	0.184	3.55e-160	CK.AMs.c2	TIFA
ABL2	3e-161	0.555137	0.509	0.274	7.65e-157	CK.AMs.c2	ABL2
SDCBP	3.83e-161	0.405637	1	0.995	9.79e-157	CK.AMs.c2	SDCBP
HIVEP1	1.13e-152	0.524676	0.515	0.286	2.88e-148	CK.AMs.c2	HIVEP1
EIF1B	2.06e-151	0.488572	0.941	0.86	5.26e-147	CK.AMs.c2	EIF1B
HIF1A1	9.6e-151	0.598211	0.638	0.414	2.45e-146	CK.AMs.c2	HIF1A
PLAGL2	1.15e-150	0.297226	0.292	0.112	2.95e-146	CK.AMs.c2	PLAGL2
TNIP1	6.39e-150	0.386946	0.394	0.184	1.63e-145	CK.AMs.c2	TNIP1
P2RX71	2.39e-149	0.549101	0.62	0.396	6.09e-145	CK.AMs.c2	P2RX7
PLAUR	7.45e-148	0.565516	0.984	0.948	1.9e-143	CK.AMs.c2	PLAUR
RHOQ1	6.08e-145	0.508294	0.903	0.781	1.55e-140	CK.AMs.c2	RHOQ
CFLAR	4.58e-144	0.518149	0.845	0.67	1.17e-139	CK.AMs.c2	CFLAR
ATF3	5.42e-144	0.425835	0.284	0.111	1.38e-139	CK.AMs.c2	ATF3
RND3	4.36e-143	0.778331	0.487	0.263	1.11e-138	CK.AMs.c2	RND3
MACC1	4.82e-142	0.642557	0.816	0.635	1.23e-137	CK.AMs.c2	MACC1
NR1H31	4.99e-141	0.611749	0.591	0.364	1.28e-136	CK.AMs.c2	NR1H3
MAP2K3	8.41e-141	0.418952	0.508	0.284	2.15e-136	CK.AMs.c2	MAP2K3
CLIC4	1.25e-139	0.49748	0.869	0.727	3.2e-135	CK.AMs.c2	CLIC4
RARRES11	4.16e-136	0.470299	0.314	0.133	1.06e-131	CK.AMs.c2	RARRES1
PSAP1	7.41e-136	0.361387	1	1	1.89e-131	CK.AMs.c2	PSAP
CTSS1	5.07e-135	0.326575	1	1	1.29e-130	CK.AMs.c2	CTSS
KDM6B	9.07e-135	0.545699	0.608	0.397	2.32e-130	CK.AMs.c2	KDM6B
ZEB21	1.66e-134	0.517066	0.967	0.92	4.23e-130	CK.AMs.c2	ZEB2
KLHL51	5.39e-134	0.259944	0.271	0.105	1.38e-129	CK.AMs.c2	KLHL5
PLIN2	3.36e-133	0.695696	0.986	0.963	8.57e-129	CK.AMs.c2	PLIN2
CD361	2.16e-131	0.66966	0.504	0.286	5.53e-127	CK.AMs.c2	CD36
RAPGEF2	1.42e-130	0.488779	0.547	0.334	3.63e-126	CK.AMs.c2	RAPGEF2
RASSF41	1.14e-129	0.57578	0.672	0.477	2.91e-125	CK.AMs.c2	RASSF4
DMXL21	1.63e-129	0.542987	0.785	0.617	4.17e-125	CK.AMs.c2	DMXL2
DNAJA1	1.47e-128	0.422495	0.994	0.97	3.75e-124	CK.AMs.c2	DNAJA1
NFKBIZ	3.38e-126	0.566731	0.468	0.261	8.63e-122	CK.AMs.c2	NFKBIZ
SUSD1	5.3e-126	0.596513	0.605	0.408	1.35e-121	CK.AMs.c2	SUSD1
SLC43A2	9.18e-126	0.495373	0.677	0.477	2.34e-121	CK.AMs.c2	SLC43A2
WSB1	1.7e-123	0.463655	0.942	0.872	4.35e-119	CK.AMs.c2	WSB1
BAZ1A	4.07e-123	0.537962	0.871	0.755	1.04e-118	CK.AMs.c2	BAZ1A
RUFY31	4.07e-123	0.454099	0.624	0.413	1.04e-118	CK.AMs.c2	RUFY3
SLC11A2	9.26e-123	0.450883	0.582	0.37	2.37e-118	CK.AMs.c2	SLC11A2
RPS27A	4.03e-122	0.272922	1	1	1.03e-117	CK.AMs.c2	RPS27A
H3F3B	7.26e-122	0.392453	0.999	0.997	1.85e-117	CK.AMs.c2	H3F3B
OPTN	9.28e-121	0.483928	0.707	0.514	2.37e-116	CK.AMs.c2	OPTN
CD441	4.11e-119	0.413439	0.996	0.974	1.05e-114	CK.AMs.c2	CD44
CD80	9.75e-119	0.287263	0.299	0.13	2.49e-114	CK.AMs.c2	CD80
LACTB	1.22e-118	0.416788	0.955	0.863	3.11e-114	CK.AMs.c2	LACTB
PIK3AP1	7.82e-118	0.521959	0.798	0.633	2e-113	CK.AMs.c2	PIK3AP1
FPR2	1.15e-117	0.408535	0.548	0.324	2.93e-113	CK.AMs.c2	FPR2
HNRNPC	1.69e-116	0.380991	0.978	0.936	4.32e-112	CK.AMs.c2	HNRNPC
FNIP2	2.42e-116	0.44854	0.514	0.31	6.17e-112	CK.AMs.c2	FNIP2
BTG2	3.34e-116	0.735088	0.756	0.612	8.54e-112	CK.AMs.c2	BTG2
IL6ST	3.63e-116	0.439108	0.658	0.459	9.28e-112	CK.AMs.c2	IL6ST
LHFPL21	1.51e-114	0.521451	0.566	0.37	3.87e-110	CK.AMs.c2	LHFPL2
NIBAN11	5.27e-112	0.505364	0.846	0.727	1.35e-107	CK.AMs.c2	NIBAN1
ATF51	1.11e-109	0.342108	0.379	0.195	2.85e-105	CK.AMs.c2	ATF5
CD55	1.77e-109	0.560539	0.871	0.781	4.51e-105	CK.AMs.c2	CD55
TIMP11	6.66e-109	0.589446	0.911	0.814	1.7e-104	CK.AMs.c2	TIMP1
MCTP11	2.34e-108	0.480835	0.539	0.343	5.98e-104	CK.AMs.c2	MCTP1
BID	2.1e-105	0.452874	0.929	0.839	5.36e-101	CK.AMs.c2	BID
XBP1	2.54e-105	0.423235	0.838	0.697	6.49e-101	CK.AMs.c2	XBP1
NABP1	3.61e-105	0.484186	0.665	0.471	9.21e-101	CK.AMs.c2	NABP1
DUSP6	2.43e-104	0.551275	0.541	0.342	6.2e-100	CK.AMs.c2	DUSP6
MMP2-AS11	2.6e-104	0.359503	0.318	0.152	6.63e-100	CK.AMs.c2	MMP2-AS1
REL	2.8e-102	0.491315	0.797	0.658	7.15e-98	CK.AMs.c2	REL
S100A91	5.29e-102	0.478638	1	0.997	1.35e-97	CK.AMs.c2	S100A9
FPR31	2.24e-101	0.546438	0.469	0.282	5.72e-97	CK.AMs.c2	FPR3
LILRB21	1.92e-100	0.352574	0.373	0.196	4.91e-96	CK.AMs.c2	LILRB2
LILRB41	5.54e-100	0.355011	0.4	0.215	1.41e-95	CK.AMs.c2	LILRB4
MYD88	2.45e-99	0.4157	0.924	0.85	6.26e-95	CK.AMs.c2	MYD88
PTPRE	6.75e-99	0.47506	0.558	0.364	1.72e-94	CK.AMs.c2	PTPRE
TRAF3	1.29e-98	0.283956	0.35	0.179	3.3e-94	CK.AMs.c2	TRAF3
HCK	1.84e-97	0.399026	0.92	0.808	4.69e-93	CK.AMs.c2	HCK
FTL	2.01e-96	0.331149	1	1	5.14e-92	CK.AMs.c2	FTL
ZNF267	7.16e-96	0.390397	0.51	0.324	1.83e-91	CK.AMs.c2	ZNF267
CTSL1	2.75e-95	0.546304	0.995	0.983	7.03e-91	CK.AMs.c2	CTSL
IL7R	7.76e-95	0.63103	0.829	0.707	1.98e-90	CK.AMs.c2	IL7R
RASGEF1B	8.11e-94	0.458945	0.733	0.584	2.07e-89	CK.AMs.c2	RASGEF1B
SOCS3	6.61e-93	0.521985	0.48	0.299	1.69e-88	CK.AMs.c2	SOCS3
BLVRB1	1.03e-92	0.437597	0.879	0.793	2.64e-88	CK.AMs.c2	BLVRB
CFD4	9.71e-91	0.663116	0.983	0.974	2.48e-86	CK.AMs.c2	CFD
STK17A	3.85e-90	0.381779	0.463	0.285	9.83e-86	CK.AMs.c2	STK17A
PTPRJ1	1.14e-88	0.340585	0.518	0.334	2.92e-84	CK.AMs.c2	PTPRJ
IFNAR1	3.82e-88	0.377195	0.783	0.633	9.75e-84	CK.AMs.c2	IFNAR1
UBE2J1	8.95e-88	0.379418	0.75	0.6	2.28e-83	CK.AMs.c2	UBE2J1
DDX3X	2.65e-87	0.398889	0.86	0.741	6.78e-83	CK.AMs.c2	DDX3X
MIR155HG	1.69e-86	0.312793	0.277	0.135	4.33e-82	CK.AMs.c2	MIR155HG
NCOA41	2.28e-86	0.38099	0.897	0.813	5.82e-82	CK.AMs.c2	NCOA4
IRF1	5.29e-86	0.678492	0.745	0.65	1.35e-81	CK.AMs.c2	IRF1
ZFP36	9.53e-86	0.6492	0.802	0.702	2.43e-81	CK.AMs.c2	ZFP36
CD40	1.09e-83	0.44981	0.66	0.508	2.78e-79	CK.AMs.c2	CD40
SFPQ	1.46e-83	0.393336	0.832	0.707	3.74e-79	CK.AMs.c2	SFPQ
DICER11	5.13e-83	0.391671	0.798	0.673	1.31e-78	CK.AMs.c2	DICER1
MMP141	6.14e-83	0.264115	0.331	0.175	1.57e-78	CK.AMs.c2	MMP14
ARRDC3	6.44e-83	0.357801	0.389	0.223	1.65e-78	CK.AMs.c2	ARRDC3
AC026369.3	7.43e-83	0.411828	0.951	0.905	1.9e-78	CK.AMs.c2	AC026369.3
NR4A1	2.59e-82	0.313919	0.264	0.126	6.62e-78	CK.AMs.c2	NR4A1
CPM1	2.61e-82	0.492988	0.846	0.755	6.68e-78	CK.AMs.c2	CPM
DUSP12	3.6e-82	0.517741	0.937	0.863	9.2e-78	CK.AMs.c2	DUSP1
PPP1R15A	7.56e-81	0.555373	0.684	0.544	1.93e-76	CK.AMs.c2	PPP1R15A
ETV3	2.84e-80	0.25593	0.338	0.181	7.26e-76	CK.AMs.c2	ETV3
CDKN1A	2.34e-79	0.481728	0.457	0.276	5.97e-75	CK.AMs.c2	CDKN1A
AL138756.1	4.61e-79	0.2797	0.322	0.172	1.18e-74	CK.AMs.c2	AL138756.1
ADA21	5.05e-78	0.37396	0.898	0.808	1.29e-73	CK.AMs.c2	ADA2
ADGRE11	7.24e-78	0.377379	0.506	0.335	1.85e-73	CK.AMs.c2	ADGRE1
LGALS11	1.25e-77	0.307912	1	0.999	3.19e-73	CK.AMs.c2	LGALS1
TSC22D1	2.26e-77	0.420002	0.477	0.309	5.77e-73	CK.AMs.c2	TSC22D1
RELT	3.93e-77	0.329899	0.436	0.272	1e-72	CK.AMs.c2	RELT
MALAT11	6.24e-77	0.460783	0.996	0.992	1.59e-72	CK.AMs.c2	MALAT1
BACH1	4.16e-76	0.379867	0.857	0.758	1.06e-71	CK.AMs.c2	BACH1
EVA1B1	8.09e-76	0.290718	0.382	0.22	2.07e-71	CK.AMs.c2	EVA1B
PVR	1.89e-75	0.273759	0.358	0.203	4.82e-71	CK.AMs.c2	PVR
AC020656.11	3.84e-75	0.47437	0.946	0.887	9.81e-71	CK.AMs.c2	AC020656.1
TYMP1	1.19e-74	0.319765	0.967	0.921	3.04e-70	CK.AMs.c2	TYMP
XIST	3.73e-74	0.547782	0.517	0.338	9.52e-70	CK.AMs.c2	XIST
PTGER4	2.88e-73	0.382457	0.812	0.699	7.37e-69	CK.AMs.c2	PTGER4
PLSCR1	3.27e-73	0.32328	0.934	0.831	8.35e-69	CK.AMs.c2	PLSCR1
CASP5	9.09e-73	0.301011	0.38	0.225	2.32e-68	CK.AMs.c2	CASP5
TAP1	9.42e-73	0.303735	0.51	0.342	2.41e-68	CK.AMs.c2	TAP1
PNRC2	9.18e-72	0.342067	0.845	0.754	2.34e-67	CK.AMs.c2	PNRC2
OAZ2	4.99e-71	0.265969	0.407	0.248	1.28e-66	CK.AMs.c2	OAZ2
DDX5	1.75e-70	0.285671	0.993	0.973	4.47e-66	CK.AMs.c2	DDX5
TLR7	2.44e-70	0.294681	0.424	0.264	6.22e-66	CK.AMs.c2	TLR7
TNIK1	5.79e-70	0.422789	0.52	0.37	1.48e-65	CK.AMs.c2	TNIK
RBM47	1.71e-69	0.334735	0.901	0.816	4.37e-65	CK.AMs.c2	RBM47
CASP4	2.12e-69	0.337042	0.785	0.667	5.41e-65	CK.AMs.c2	CASP4
PPP1R15B	3.93e-69	0.354062	0.573	0.411	1e-64	CK.AMs.c2	PPP1R15B
TANK	5.7e-69	0.343281	0.772	0.66	1.46e-64	CK.AMs.c2	TANK
CEBPD1	8.55e-69	0.439858	0.577	0.421	2.18e-64	CK.AMs.c2	CEBPD
EAF1	4.13e-68	0.271171	0.414	0.258	1.05e-63	CK.AMs.c2	EAF1
RELA	5.11e-68	0.276013	0.459	0.298	1.31e-63	CK.AMs.c2	RELA
PDLIM5	6.55e-68	0.324886	0.722	0.581	1.67e-63	CK.AMs.c2	PDLIM5
HLA-A1	6.88e-68	0.265864	1	0.999	1.76e-63	CK.AMs.c2	HLA-A
NOTCH21	7.41e-68	0.317738	0.578	0.418	1.89e-63	CK.AMs.c2	NOTCH2
ELL21	1.65e-67	0.354279	0.625	0.474	4.21e-63	CK.AMs.c2	ELL2
RNF19A	2.99e-67	0.375211	0.684	0.547	7.63e-63	CK.AMs.c2	RNF19A
TBC1D9	6.93e-67	0.350382	0.681	0.538	1.77e-62	CK.AMs.c2	TBC1D9
TUBA1C	7.94e-67	0.396704	0.767	0.663	2.03e-62	CK.AMs.c2	TUBA1C
DAPP1	2.96e-66	0.339622	0.647	0.506	7.57e-62	CK.AMs.c2	DAPP1
CYB5A1	3e-66	0.338875	0.944	0.896	7.65e-62	CK.AMs.c2	CYB5A
FOSL2	4.63e-66	0.315905	0.529	0.369	1.18e-61	CK.AMs.c2	FOSL2
EMP3	7.42e-66	0.328787	0.986	0.964	1.89e-61	CK.AMs.c2	EMP3
PTPN1	7.99e-65	0.319136	0.774	0.636	2.04e-60	CK.AMs.c2	PTPN1
RIPK2	9.96e-65	0.329714	0.538	0.387	2.54e-60	CK.AMs.c2	RIPK2
HLA-B1	1.02e-64	0.266975	1	1	2.61e-60	CK.AMs.c2	HLA-B
APOE1	1.42e-64	0.390231	0.998	0.995	3.61e-60	CK.AMs.c2	APOE
APOC11	1.54e-64	0.319867	1	1	3.92e-60	CK.AMs.c2	APOC1
UGP2	3.81e-64	0.294421	0.933	0.849	9.74e-60	CK.AMs.c2	UGP2
EREG	3.98e-64	0.569817	0.276	0.149	1.02e-59	CK.AMs.c2	EREG
SRI	5.94e-64	0.299903	0.956	0.903	1.52e-59	CK.AMs.c2	SRI
CTSB1	2.86e-63	0.346857	0.998	0.994	7.29e-59	CK.AMs.c2	CTSB
SPRY1	2.92e-63	0.318069	0.399	0.252	7.47e-59	CK.AMs.c2	SPRY1
LIMS11	5.03e-63	0.32186	0.874	0.769	1.28e-58	CK.AMs.c2	LIMS1
CALHM61	1.84e-62	0.37985	0.41	0.264	4.7e-58	CK.AMs.c2	CALHM6
LILRB11	2.16e-62	0.349754	0.617	0.471	5.52e-58	CK.AMs.c2	LILRB1
DAPK1	3.31e-62	0.347089	0.723	0.614	8.45e-58	CK.AMs.c2	DAPK1
CD47	2.07e-61	0.295856	0.964	0.92	5.28e-57	CK.AMs.c2	CD47
G3BP1	4.64e-61	0.335366	0.786	0.682	1.19e-56	CK.AMs.c2	G3BP1
CRYBG1	1.04e-60	0.330165	0.684	0.543	2.67e-56	CK.AMs.c2	CRYBG1
SLC20A1	1.42e-60	0.255347	0.338	0.2	3.63e-56	CK.AMs.c2	SLC20A1
PLEKHO2	2.98e-60	0.336062	0.677	0.547	7.61e-56	CK.AMs.c2	PLEKHO2
PHLDA1	3.12e-60	0.353736	0.276	0.152	7.97e-56	CK.AMs.c2	PHLDA1
LIPA1	3.87e-60	0.428866	0.898	0.825	9.89e-56	CK.AMs.c2	LIPA
NAP1L11	3.95e-60	0.26003	0.995	0.991	1.01e-55	CK.AMs.c2	NAP1L1
NUMB	2.53e-59	0.328227	0.655	0.52	6.45e-55	CK.AMs.c2	NUMB
GPD2	6.12e-59	0.314819	0.563	0.421	1.56e-54	CK.AMs.c2	GPD2
PSD31	7.87e-59	0.395156	0.525	0.388	2.01e-54	CK.AMs.c2	PSD3
GRINA	1.12e-58	0.286219	0.941	0.89	2.85e-54	CK.AMs.c2	GRINA
NCK1	2.42e-58	0.302121	0.807	0.701	6.18e-54	CK.AMs.c2	NCK1
SGMS1	2.57e-58	0.31357	0.523	0.379	6.57e-54	CK.AMs.c2	SGMS1
GBP21	6.53e-58	0.35318	0.739	0.618	1.67e-53	CK.AMs.c2	GBP2
SQOR	9.48e-58	0.281513	0.892	0.786	2.42e-53	CK.AMs.c2	SQOR
FCHO21	1.55e-57	0.323114	0.762	0.642	3.96e-53	CK.AMs.c2	FCHO2
FGR	5.03e-57	0.297578	0.698	0.562	1.28e-52	CK.AMs.c2	FGR
GPX31	5.44e-57	0.295074	0.354	0.219	1.39e-52	CK.AMs.c2	GPX3
FCGR3A1	9.25e-57	0.25732	0.995	0.987	2.36e-52	CK.AMs.c2	FCGR3A
CD821	1e-56	0.298231	0.54	0.395	2.55e-52	CK.AMs.c2	CD82
N4BP1	1.96e-56	0.319104	0.709	0.57	5.01e-52	CK.AMs.c2	N4BP1
SMCO41	6.19e-56	0.322456	0.943	0.906	1.58e-51	CK.AMs.c2	SMCO4
2022-03-11	7.18e-56	0.346374	0.851	0.781	1.83e-51	CK.AMs.c2	2022-03-01
TMPO	1.63e-55	0.333154	0.581	0.445	4.17e-51	CK.AMs.c2	TMPO
FNDC3B	2.63e-55	0.323091	0.905	0.839	6.71e-51	CK.AMs.c2	FNDC3B
LITAF	4.53e-55	0.269689	0.998	0.995	1.16e-50	CK.AMs.c2	LITAF
IL10RA1	6.16e-55	0.283731	0.601	0.454	1.57e-50	CK.AMs.c2	IL10RA
PLEKHF2	3.84e-54	0.252676	0.429	0.287	9.81e-50	CK.AMs.c2	PLEKHF2
SGK11	7.73e-54	0.439149	0.591	0.454	1.98e-49	CK.AMs.c2	SGK1
RPS4X1	9e-54	0.252151	1	1	2.3e-49	CK.AMs.c2	RPS4X
CD841	1e-53	0.356927	0.565	0.435	2.55e-49	CK.AMs.c2	CD84
KCTD121	1.02e-53	0.329939	0.895	0.838	2.6e-49	CK.AMs.c2	KCTD12
PPP1R18	1.08e-53	0.283013	0.698	0.571	2.75e-49	CK.AMs.c2	PPP1R18
SKIL	1.31e-53	0.309321	0.889	0.826	3.34e-49	CK.AMs.c2	SKIL
RAB10	2.48e-53	0.268511	0.965	0.911	6.34e-49	CK.AMs.c2	RAB10
USP12	6.23e-53	0.274142	0.445	0.31	1.59e-48	CK.AMs.c2	USP12
FAM107B	1.02e-52	0.349059	0.903	0.854	2.61e-48	CK.AMs.c2	FAM107B
P2RY13	2.5e-52	0.427362	0.469	0.337	6.39e-48	CK.AMs.c2	P2RY13
PCNX1	2.87e-52	0.291698	0.634	0.498	7.32e-48	CK.AMs.c2	PCNX1
TNFAIP8	1.22e-51	0.319099	0.688	0.571	3.12e-47	CK.AMs.c2	TNFAIP8
RBP42	1.55e-51	0.503354	0.8	0.691	3.96e-47	CK.AMs.c2	RBP4
CSTB	3.52e-51	0.250468	1	1	8.98e-47	CK.AMs.c2	CSTB
SEC22B1	3.68e-51	0.27417	0.715	0.599	9.4e-47	CK.AMs.c2	SEC22B
DNAJB1	5.99e-51	0.342084	0.473	0.34	1.53e-46	CK.AMs.c2	DNAJB1
ATP13A3	1.25e-50	0.33661	0.552	0.424	3.2e-46	CK.AMs.c2	ATP13A3
ACP21	2.4e-50	0.288504	0.523	0.386	6.14e-46	CK.AMs.c2	ACP2
KLF6	2.49e-50	0.426569	0.842	0.782	6.36e-46	CK.AMs.c2	KLF6
MAP3K8	3.62e-50	0.288829	0.739	0.606	9.24e-46	CK.AMs.c2	MAP3K8
TLNRD1	1.25e-49	0.251149	0.52	0.38	3.19e-45	CK.AMs.c2	TLNRD1
SLC43A3	1.62e-49	0.276442	0.487	0.348	4.13e-45	CK.AMs.c2	SLC43A3
P4HA1	3.3e-49	0.273402	0.818	0.722	8.44e-45	CK.AMs.c2	P4HA1
JAK11	6.27e-49	0.273554	0.886	0.812	1.6e-44	CK.AMs.c2	JAK1
TSPAN14	1.22e-48	0.277827	0.756	0.644	3.12e-44	CK.AMs.c2	TSPAN14
SMAP21	3.13e-47	0.3093	0.783	0.695	8e-43	CK.AMs.c2	SMAP2
DDX17	6.28e-47	0.267605	0.907	0.853	1.6e-42	CK.AMs.c2	DDX17
LCP2	1.06e-46	0.308845	0.724	0.617	2.7e-42	CK.AMs.c2	LCP2
RILPL2	1.07e-46	0.266642	0.782	0.679	2.73e-42	CK.AMs.c2	RILPL2
LMO4	3.25e-46	0.361242	0.778	0.714	8.3e-42	CK.AMs.c2	LMO4
ARFGAP3	5.24e-46	0.299046	0.688	0.579	1.34e-41	CK.AMs.c2	ARFGAP3
FMNL21	6.49e-46	0.301381	0.791	0.693	1.66e-41	CK.AMs.c2	FMNL2
SMS1	1.13e-45	0.253681	0.863	0.78	2.89e-41	CK.AMs.c2	SMS
STAT3	1.18e-45	0.26915	0.806	0.702	3.02e-41	CK.AMs.c2	STAT3
MAFF	1.6e-45	0.265577	0.38	0.254	4.09e-41	CK.AMs.c2	MAFF
ITGAV	1.8e-45	0.269069	0.457	0.329	4.59e-41	CK.AMs.c2	ITGAV
CMTM3	2.37e-45	0.266838	0.502	0.371	6.05e-41	CK.AMs.c2	CMTM3
PEA151	4.11e-45	0.267588	0.472	0.343	1.05e-40	CK.AMs.c2	PEA15
SCD	6.02e-44	0.359296	0.949	0.929	1.54e-39	CK.AMs.c2	SCD
MFHAS1	8.56e-44	0.253335	0.544	0.411	2.19e-39	CK.AMs.c2	MFHAS1
ACO11	1.73e-43	0.265487	0.897	0.837	4.41e-39	CK.AMs.c2	ACO1
BMP2K1	4.15e-43	0.288917	0.601	0.484	1.06e-38	CK.AMs.c2	BMP2K
IER2	1.22e-42	0.431092	0.581	0.478	3.11e-38	CK.AMs.c2	IER2
CD58	3.89e-42	0.265237	0.792	0.691	9.93e-38	CK.AMs.c2	CD58
KCNMA11	5.79e-42	0.316502	0.545	0.415	1.48e-37	CK.AMs.c2	KCNMA1
TDP2	7.59e-42	0.291354	0.532	0.411	1.94e-37	CK.AMs.c2	TDP2
STX11	1.04e-41	0.250759	0.848	0.777	2.66e-37	CK.AMs.c2	STX11
LINC010941	1.07e-41	0.364158	0.687	0.59	2.75e-37	CK.AMs.c2	LINC01094
TFRC	1.63e-41	0.30658	0.984	0.96	4.16e-37	CK.AMs.c2	TFRC
C1orf541	8.78e-41	0.260827	0.315	0.203	2.24e-36	CK.AMs.c2	C1orf54
HMOX11	9.48e-41	0.465452	0.817	0.781	2.42e-36	CK.AMs.c2	HMOX1
AMIGO2	1.19e-40	0.28444	0.849	0.765	3.03e-36	CK.AMs.c2	AMIGO2
MIDN	1.72e-40	0.278399	0.645	0.534	4.39e-36	CK.AMs.c2	MIDN
CPVL1	5.96e-40	0.281954	0.919	0.874	1.52e-35	CK.AMs.c2	CPVL
RIT1	8.78e-40	0.250181	0.54	0.425	2.24e-35	CK.AMs.c2	RIT1
ETS2	1.8e-39	0.29114	0.604	0.488	4.6e-35	CK.AMs.c2	ETS2
ZFX	1.9e-39	0.297655	0.469	0.355	4.84e-35	CK.AMs.c2	ZFX
C17orf491	3.1e-39	0.267582	0.703	0.6	7.91e-35	CK.AMs.c2	C17orf49
TNFSF13B1	5.43e-39	0.28214	0.86	0.787	1.39e-34	CK.AMs.c2	TNFSF13B
METRNL	6.8e-39	0.285732	0.689	0.585	1.74e-34	CK.AMs.c2	METRNL
EPB41L31	1.2e-38	0.263171	0.675	0.566	3.06e-34	CK.AMs.c2	EPB41L3
ADAM17	1.26e-38	0.259531	0.864	0.8	3.21e-34	CK.AMs.c2	ADAM17
TRIB1	3.97e-38	0.274074	0.438	0.322	1.01e-33	CK.AMs.c2	TRIB1
MT-ND2	4.61e-38	0.25047	0.997	0.997	1.18e-33	CK.AMs.c2	MT-ND2
TRG-AS1	1.57e-37	0.269432	0.475	0.362	4e-33	CK.AMs.c2	TRG-AS1
VMP11	2.47e-36	0.31378	0.811	0.75	6.31e-32	CK.AMs.c2	VMP1
C1orf122	5.57e-36	0.279897	0.732	0.641	1.42e-31	CK.AMs.c2	C1orf122
CCNL1	4.76e-35	0.266515	0.643	0.536	1.22e-30	CK.AMs.c2	CCNL1
CCR1	6.21e-35	0.251565	0.563	0.448	1.59e-30	CK.AMs.c2	CCR1
C5AR1	1.74e-34	0.268001	0.962	0.926	4.44e-30	CK.AMs.c2	C5AR1
GK	2.02e-34	0.290454	0.677	0.573	5.15e-30	CK.AMs.c2	GK
GBP3	3.45e-34	0.316542	0.679	0.589	8.8e-30	CK.AMs.c2	GBP3
TSPAN41	1.61e-33	0.259112	0.674	0.571	4.11e-29	CK.AMs.c2	TSPAN4
ARRDC4	1.79e-32	0.293264	0.747	0.672	4.57e-28	CK.AMs.c2	ARRDC4
MXD1	4.9e-30	0.31089	0.409	0.312	1.25e-25	CK.AMs.c2	MXD1
JUN	4.18e-29	0.389663	0.897	0.862	1.07e-24	CK.AMs.c2	JUN
FABP43	4.36e-29	0.287178	0.999	0.999	1.11e-24	CK.AMs.c2	FABP4
MGLL	4.07e-26	0.251648	0.681	0.6	1.04e-21	CK.AMs.c2	MGLL
TMEM176B1	6.38e-18	0.269767	0.437	0.361	1.63e-13	CK.AMs.c2	TMEM176B
GBP51	3.46e-17	0.297559	0.317	0.25	8.84e-13	CK.AMs.c2	GBP5
HSPA1A	2.05e-15	0.26515	0.778	0.722	5.23e-11	CK.AMs.c2	HSPA1A
APOC22	4.49e-12	0.315927	0.454	0.384	1.15e-07	CK.AMs.c2	APOC2
RGS11	9.64e-10	0.295078	0.355	0.302	2.46e-05	CK.AMs.c2	RGS1
CSF1	1.28e-09	0.283259	0.319	0.263	3.26e-05	CK.AMs.c2	CSF1
IFITM2	2.8e-07	0.282359	0.555	0.508	0.00714357	CK.AMs.c2	IFITM2
CXCL101	0	5.30792	0.817	0.043	0	CK.AMs.c3	CXCL10
CXCL91	0	4.21187	0.502	0.043	0	CK.AMs.c3	CXCL9
GBP12	0	3.37397	0.991	0.704	0	CK.AMs.c3	GBP1
SOD22	0	3.13183	0.993	0.763	0	CK.AMs.c3	SOD2
CXCL11	0	3.10177	0.528	0.012	0	CK.AMs.c3	CXCL11
GBP52	0	2.87776	0.896	0.242	0	CK.AMs.c3	GBP5
C15orf482	0	2.6955	0.766	0.25	0	CK.AMs.c3	C15orf48
TNFAIP62	0	2.55388	0.533	0.05	0	CK.AMs.c3	TNFAIP6
CCL41	0	2.46228	0.417	0.102	0	CK.AMs.c3	CCL4
VAMP51	0	2.43401	0.83	0.315	0	CK.AMs.c3	VAMP5
MARCKS2	0	2.36686	0.65	0.112	0	CK.AMs.c3	MARCKS
CALHM62	0	2.36542	0.8	0.26	0	CK.AMs.c3	CALHM6
WARS1	0	2.22512	0.982	0.677	0	CK.AMs.c3	WARS
GBP41	0	2.13686	0.953	0.46	0	CK.AMs.c3	GBP4
NCF12	0	1.97497	0.906	0.562	0	CK.AMs.c3	NCF1
STAT11	0	1.78848	0.992	0.79	0	CK.AMs.c3	STAT1
SLAMF71	0	1.71686	0.511	0.036	0	CK.AMs.c3	SLAMF7
PLAAT41	0	1.6653	0.896	0.471	0	CK.AMs.c3	PLAAT4
PSTPIP22	0	1.62388	0.786	0.115	0	CK.AMs.c3	PSTPIP2
PLEK1	0	1.5972	0.979	0.894	0	CK.AMs.c3	PLEK
LAP31	0	1.59388	0.994	0.884	0	CK.AMs.c3	LAP3
PSMB91	0	1.53218	0.992	0.862	0	CK.AMs.c3	PSMB9
TNFSF13B2	0	1.4901	0.98	0.786	0	CK.AMs.c3	TNFSF13B
TAP11	0	1.47043	0.865	0.339	0	CK.AMs.c3	TAP1
PSME21	0	1.44981	0.999	0.948	0	CK.AMs.c3	PSME2
SLAMF82	0	1.44834	0.909	0.388	0	CK.AMs.c3	SLAMF8
PLEKHO11	0	1.43657	0.767	0.223	0	CK.AMs.c3	PLEKHO1
FYB12	0	1.41682	0.96	0.725	0	CK.AMs.c3	FYB1
SNX102	0	1.41334	1	0.995	0	CK.AMs.c3	SNX10
TNIP31	0	1.3619	0.413	0.057	0	CK.AMs.c3	TNIP3
GBP22	0	1.33746	0.93	0.616	0	CK.AMs.c3	GBP2
CD401	0	1.32738	0.883	0.506	0	CK.AMs.c3	CD40
EPSTI1	0	1.24642	0.931	0.596	0	CK.AMs.c3	EPSTI1
SLC39A82	0	1.23483	0.493	0.055	0	CK.AMs.c3	SLC39A8
ICAM11	0	1.21016	0.648	0.163	0	CK.AMs.c3	ICAM1
GCH11	0	1.17674	0.597	0.063	0	CK.AMs.c3	GCH1
ANKRD22	0	1.12361	0.404	0.013	0	CK.AMs.c3	ANKRD22
TYMP2	0	1.06983	0.993	0.921	0	CK.AMs.c3	TYMP
IL4I12	0	1.00844	0.473	0.061	0	CK.AMs.c3	IL4I1
ISG20	0	0.953112	0.421	0.037	0	CK.AMs.c3	ISG20
APOL3	0	0.84855	0.534	0.128	0	CK.AMs.c3	APOL3
ATF52	0	0.7593	0.58	0.193	0	CK.AMs.c3	ATF5
IL27	0	0.632469	0.38	0.051	0	CK.AMs.c3	IL27
HAPLN3	0	0.626933	0.352	0.006	0	CK.AMs.c3	HAPLN3
AIM2	0	0.605037	0.41	0.074	0	CK.AMs.c3	AIM2
RELB2	0	0.60398	0.423	0.077	0	CK.AMs.c3	RELB
ETV7	0	0.55107	0.335	0.022	0	CK.AMs.c3	ETV7
MREG	0	0.491993	0.288	0.039	0	CK.AMs.c3	MREG
IL15RA	0	0.469828	0.333	0.054	0	CK.AMs.c3	IL15RA
P2RY14	0	0.467173	0.275	0.034	0	CK.AMs.c3	P2RY14
NINJ12	5.95e-307	1.15932	0.604	0.227	1.52e-302	CK.AMs.c3	NINJ1
STOM2	2.03e-296	1.00416	0.963	0.799	5.19e-292	CK.AMs.c3	STOM
IRF11	6.83e-283	1.50639	0.883	0.649	1.74e-278	CK.AMs.c3	IRF1
SAT12	6.93e-283	1.01789	0.999	0.996	1.77e-278	CK.AMs.c3	SAT1
HLA-B2	1e-279	0.782013	1	1	2.55e-275	CK.AMs.c3	HLA-B
CD38	3.85e-279	0.550148	0.289	0.057	9.85e-275	CK.AMs.c3	CD38
TNFSF10	7.28e-278	1.35265	0.84	0.515	1.86e-273	CK.AMs.c3	TNFSF10
CCL4L22	1.89e-275	1.96368	0.452	0.135	4.83e-271	CK.AMs.c3	CCL4L2
CD2741	2.53e-275	1.07776	0.662	0.288	6.46e-271	CK.AMs.c3	CD274
CCL31	1.84e-274	1.50642	0.269	0.05	4.71e-270	CK.AMs.c3	CCL3
DYNLT1	2.57e-271	0.854283	0.979	0.899	6.55e-267	CK.AMs.c3	DYNLT1
SMCO42	6.33e-267	0.848717	0.979	0.906	1.62e-262	CK.AMs.c3	SMCO4
MYOF	2.65e-266	0.996886	0.926	0.689	6.76e-262	CK.AMs.c3	MYOF
IFITM3	5.95e-264	1.25447	0.917	0.671	1.52e-259	CK.AMs.c3	IFITM3
TIFA1	2.22e-263	0.918279	0.526	0.184	5.67e-259	CK.AMs.c3	TIFA
HLA-A2	3.37e-263	0.772455	1	0.999	8.62e-259	CK.AMs.c3	HLA-A
HLA-E1	3.76e-263	0.682181	0.998	0.982	9.61e-259	CK.AMs.c3	HLA-E
SLC2A61	3.1e-262	0.720889	0.572	0.209	7.93e-258	CK.AMs.c3	SLC2A6
GK1	1.07e-259	1.04593	0.883	0.571	2.72e-255	CK.AMs.c3	GK
CFB	3.99e-259	0.470513	0.274	0.055	1.02e-254	CK.AMs.c3	CFB
IFIH1	4.33e-259	0.973207	0.808	0.47	1.11e-254	CK.AMs.c3	IFIH1
JAK2	1.46e-258	0.852161	0.741	0.374	3.74e-254	CK.AMs.c3	JAK2
HLA-F1	2.31e-250	0.868249	0.973	0.836	5.9e-246	CK.AMs.c3	HLA-F
IL18BP	3.99e-250	0.625728	0.404	0.115	1.02e-245	CK.AMs.c3	IL18BP
IFNGR22	1.96e-249	1.01385	0.92	0.723	5.01e-245	CK.AMs.c3	IFNGR2
TMSB10	1.21e-248	0.547037	1	1	3.1e-244	CK.AMs.c3	TMSB10
MT2A2	1.52e-248	1.65449	0.932	0.688	3.89e-244	CK.AMs.c3	MT2A
BIRC31	5.29e-247	0.700349	0.361	0.094	1.35e-242	CK.AMs.c3	BIRC3
DRAM12	2.79e-246	1.14902	0.855	0.6	7.14e-242	CK.AMs.c3	DRAM1
FCGR1A	1.42e-244	0.94454	0.924	0.711	3.62e-240	CK.AMs.c3	FCGR1A
XRN1	1.02e-241	0.886944	0.835	0.528	2.59e-237	CK.AMs.c3	XRN1
OPTN1	1.11e-240	0.970411	0.826	0.514	2.83e-236	CK.AMs.c3	OPTN
SAMD9L	4.26e-239	0.879217	0.965	0.826	1.09e-234	CK.AMs.c3	SAMD9L
TAPBP1	5.61e-237	0.780256	0.982	0.88	1.43e-232	CK.AMs.c3	TAPBP
NBN1	2.75e-236	1.1145	0.846	0.571	7.04e-232	CK.AMs.c3	NBN
ARID5B	2.15e-235	0.535884	0.277	0.06	5.49e-231	CK.AMs.c3	ARID5B
TNFAIP22	8.87e-235	1.14113	0.938	0.762	2.26e-230	CK.AMs.c3	TNFAIP2
NMI	1.78e-234	0.78547	0.89	0.606	4.55e-230	CK.AMs.c3	NMI
ATOX11	1.56e-232	0.83674	0.992	0.963	3.99e-228	CK.AMs.c3	ATOX1
IFIT3	2.73e-232	1.07702	0.967	0.861	6.97e-228	CK.AMs.c3	IFIT3
SLC1A32	1.84e-230	0.93154	0.617	0.272	4.69e-226	CK.AMs.c3	SLC1A3
TMEM176B2	1.54e-228	1.22114	0.701	0.358	3.95e-224	CK.AMs.c3	TMEM176B
PSMB8	2.68e-227	0.785523	0.98	0.898	6.84e-223	CK.AMs.c3	PSMB8
APOL6	6.34e-227	0.861252	0.962	0.861	1.62e-222	CK.AMs.c3	APOL6
UBE2L6	5.67e-226	0.808854	0.922	0.697	1.45e-221	CK.AMs.c3	UBE2L6
FGL21	1.44e-225	0.925243	0.548	0.215	3.69e-221	CK.AMs.c3	FGL2
NUB1	2.35e-223	0.90885	0.892	0.666	6e-219	CK.AMs.c3	NUB1
POMP	2.03e-222	0.636431	0.998	0.989	5.18e-218	CK.AMs.c3	POMP
SQOR1	9.97e-222	0.801402	0.959	0.786	2.55e-217	CK.AMs.c3	SQOR
IFI44L	6.53e-220	0.84143	0.771	0.401	1.67e-215	CK.AMs.c3	IFI44L
PARP14	4.6e-216	0.920474	0.953	0.838	1.17e-211	CK.AMs.c3	PARP14
RNF213	7.01e-213	0.791044	0.984	0.884	1.79e-208	CK.AMs.c3	RNF213
RNF19B1	8.08e-213	0.807754	0.599	0.269	2.06e-208	CK.AMs.c3	RNF19B
MTHFD22	5.63e-210	0.844406	0.75	0.435	1.44e-205	CK.AMs.c3	MTHFD2
CSF2RB	8.68e-204	0.928075	0.81	0.528	2.22e-199	CK.AMs.c3	CSF2RB
MAP3K7CL	1.88e-203	0.571979	0.377	0.114	4.8e-199	CK.AMs.c3	MAP3K7CL
PARP9	1.89e-201	0.772149	0.896	0.665	4.83e-197	CK.AMs.c3	PARP9
DOCK41	3.87e-201	0.634778	0.497	0.19	9.88e-197	CK.AMs.c3	DOCK4
BATF	1.47e-200	0.336264	0.26	0.059	3.74e-196	CK.AMs.c3	BATF
KYNU2	1.78e-200	1.0024	0.85	0.613	4.54e-196	CK.AMs.c3	KYNU
USP30-AS1	1.89e-200	0.733385	0.771	0.459	4.82e-196	CK.AMs.c3	USP30-AS1
IGSF6	4.93e-200	0.892345	0.99	0.916	1.26e-195	CK.AMs.c3	IGSF6
PPA1	2.61e-198	0.921377	0.923	0.744	6.67e-194	CK.AMs.c3	PPA1
PSMA4	1.35e-195	0.683887	0.992	0.943	3.45e-191	CK.AMs.c3	PSMA4
IFI161	4.92e-195	0.72758	0.972	0.861	1.26e-190	CK.AMs.c3	IFI16
IFIT2	1.9e-193	1.15852	0.912	0.729	4.86e-189	CK.AMs.c3	IFIT2
TMEM176A1	7.04e-192	0.898203	0.579	0.256	1.8e-187	CK.AMs.c3	TMEM176A
APOL1	2.15e-191	0.771767	0.741	0.431	5.49e-187	CK.AMs.c3	APOL1
RNF144B2	7.45e-191	0.807341	0.658	0.338	1.9e-186	CK.AMs.c3	RNF144B
PSMA2	7.6e-190	0.685432	0.98	0.92	1.94e-185	CK.AMs.c3	PSMA2
PDE4B1	3.32e-189	0.68673	0.53	0.219	8.49e-185	CK.AMs.c3	PDE4B
RSAD2	2.5e-188	0.804301	0.399	0.135	6.38e-184	CK.AMs.c3	RSAD2
MCTP12	8.35e-187	0.830371	0.655	0.343	2.13e-182	CK.AMs.c3	MCTP1
CYBB	1.71e-184	0.711989	0.995	0.967	4.38e-180	CK.AMs.c3	CYBB
RASSF42	5.4e-183	0.871304	0.769	0.477	1.38e-178	CK.AMs.c3	RASSF4
NEXN	3.81e-182	0.634475	0.516	0.211	9.72e-178	CK.AMs.c3	NEXN
DSE2	4.25e-182	0.762574	0.931	0.727	1.09e-177	CK.AMs.c3	DSE
TLR22	1.05e-181	0.576284	0.446	0.165	2.69e-177	CK.AMs.c3	TLR2
LACTB1	9.92e-181	0.697496	0.969	0.864	2.53e-176	CK.AMs.c3	LACTB
GIMAP4	3.11e-180	0.749933	0.898	0.691	7.95e-176	CK.AMs.c3	GIMAP4
APOL2	2.41e-177	0.612772	0.605	0.288	6.17e-173	CK.AMs.c3	APOL2
CD482	6.52e-177	0.832838	0.456	0.173	1.67e-172	CK.AMs.c3	CD48
CD442	3.18e-176	0.684855	0.996	0.975	8.12e-172	CK.AMs.c3	CD44
SRI1	3.7e-176	0.715464	0.975	0.903	9.46e-172	CK.AMs.c3	SRI
STAT2	1.35e-175	0.723831	0.763	0.478	3.45e-171	CK.AMs.c3	STAT2
PSMB10	2.49e-175	0.750476	0.927	0.781	6.37e-171	CK.AMs.c3	PSMB10
NFKB11	3.64e-174	0.763275	0.735	0.444	9.3e-170	CK.AMs.c3	NFKB1
MIR3945HG1	8.41e-173	1.31059	0.709	0.411	2.15e-168	CK.AMs.c3	MIR3945HG
C3AR12	5.35e-172	0.808414	0.82	0.55	1.37e-167	CK.AMs.c3	C3AR1
CCL232	9.7e-171	1.33745	0.744	0.456	2.48e-166	CK.AMs.c3	CCL23
AQP92	2.59e-169	0.720512	0.681	0.359	6.6e-165	CK.AMs.c3	AQP9
P2RX72	1.02e-168	0.749805	0.691	0.397	2.61e-164	CK.AMs.c3	P2RX7
SOCS1	1.21e-168	1.0863	0.594	0.296	3.1e-164	CK.AMs.c3	SOCS1
CD471	2.39e-168	0.645428	0.985	0.92	6.1e-164	CK.AMs.c3	CD47
LYN2	1.72e-165	0.717636	0.951	0.842	4.39e-161	CK.AMs.c3	LYN
PTPRC	2.75e-165	0.570543	0.998	0.995	7.03e-161	CK.AMs.c3	PTPRC
BCL31	5.07e-162	0.448494	0.37	0.126	1.29e-157	CK.AMs.c3	BCL3
LMNB1	2.39e-161	0.385364	0.321	0.098	6.11e-157	CK.AMs.c3	LMNB1
ACSL12	1.55e-160	0.978497	0.774	0.498	3.96e-156	CK.AMs.c3	ACSL1
CTSS2	2.96e-160	0.459729	1	1	7.55e-156	CK.AMs.c3	CTSS
SP110	3.02e-160	0.704984	0.913	0.741	7.71e-156	CK.AMs.c3	SP110
SDC41	1.76e-158	0.640931	0.436	0.172	4.49e-154	CK.AMs.c3	SDC4
IFI35	6.51e-158	0.668057	0.819	0.548	1.66e-153	CK.AMs.c3	IFI35
TAP2	2.01e-157	0.562377	0.635	0.332	5.14e-153	CK.AMs.c3	TAP2
CASP41	6.97e-157	0.633385	0.879	0.667	1.78e-152	CK.AMs.c3	CASP4
RHOQ2	2.03e-155	0.748057	0.919	0.781	5.19e-151	CK.AMs.c3	RHOQ
SCML1	3.6e-155	0.547002	0.561	0.265	9.18e-151	CK.AMs.c3	SCML1
BAZ1A1	1.48e-154	0.773824	0.905	0.755	3.79e-150	CK.AMs.c3	BAZ1A
NLRC5	3.91e-151	0.290328	0.252	0.068	9.97e-147	CK.AMs.c3	NLRC5
SEMA4D	1.93e-149	0.545497	0.525	0.243	4.93e-145	CK.AMs.c3	SEMA4D
PLSCR11	1.16e-147	0.663863	0.962	0.831	2.98e-143	CK.AMs.c3	PLSCR1
LILRB42	1.89e-147	0.655883	0.489	0.216	4.84e-143	CK.AMs.c3	LILRB4
DAPP11	3.48e-147	0.677521	0.757	0.506	8.89e-143	CK.AMs.c3	DAPP1
IL15	2.43e-145	0.450035	0.494	0.214	6.2e-141	CK.AMs.c3	IL15
TFEC	7.14e-145	0.61699	0.929	0.784	1.82e-140	CK.AMs.c3	TFEC
LYSMD2	5.91e-144	0.62051	0.901	0.73	1.51e-139	CK.AMs.c3	LYSMD2
GNG10	7.93e-144	0.559745	0.99	0.96	2.02e-139	CK.AMs.c3	GNG10
SPPL2A	3.71e-143	0.595749	0.946	0.827	9.48e-139	CK.AMs.c3	SPPL2A
B2M	1.25e-139	0.398413	1	1	3.2e-135	CK.AMs.c3	B2M
ATF31	4.06e-139	0.449471	0.33	0.112	1.04e-134	CK.AMs.c3	ATF3
HLA-C	1.16e-137	0.493457	1	1	2.95e-133	CK.AMs.c3	HLA-C
FPR12	5.78e-137	0.696621	0.79	0.543	1.48e-132	CK.AMs.c3	FPR1
NECTIN2	1.72e-136	0.445772	0.426	0.175	4.38e-132	CK.AMs.c3	NECTIN2
CIITA	1.35e-135	0.643268	0.713	0.45	3.44e-131	CK.AMs.c3	CIITA
MMP142	3.76e-134	0.512414	0.419	0.175	9.61e-130	CK.AMs.c3	MMP14
S100A82	7.76e-134	1.05661	0.976	0.928	1.98e-129	CK.AMs.c3	S100A8
GBP31	3.12e-133	0.82739	0.787	0.589	7.97e-129	CK.AMs.c3	GBP3
PSME1	2.84e-132	0.581169	0.978	0.922	7.26e-128	CK.AMs.c3	PSME1
CNDP2	3.27e-132	0.579312	0.89	0.712	8.35e-128	CK.AMs.c3	CNDP2
RARRES12	4.57e-132	0.908808	0.355	0.134	1.17e-127	CK.AMs.c3	RARRES1
C17orf492	2.8e-130	0.627671	0.808	0.599	7.16e-126	CK.AMs.c3	C17orf49
CTSH1	3.11e-130	0.573581	0.991	0.962	7.94e-126	CK.AMs.c3	CTSH
ZNFX1	4.08e-130	0.586467	0.768	0.52	1.04e-125	CK.AMs.c3	ZNFX1
LIMK21	5.17e-130	0.48996	0.463	0.209	1.32e-125	CK.AMs.c3	LIMK2
NIBAN12	1.22e-129	0.678445	0.89	0.728	3.11e-125	CK.AMs.c3	NIBAN1
HTRA4	2.66e-129	0.325417	0.289	0.093	6.78e-125	CK.AMs.c3	HTRA4
STX111	2.75e-128	0.577047	0.916	0.777	7.04e-124	CK.AMs.c3	STX11
ATG3	3.27e-126	0.572831	0.932	0.807	8.35e-122	CK.AMs.c3	ATG3
PSMA3	1.79e-124	0.555856	0.952	0.832	4.56e-120	CK.AMs.c3	PSMA3
IL10RA2	1.81e-124	0.549965	0.717	0.454	4.62e-120	CK.AMs.c3	IL10RA
PNRC12	6.26e-124	0.853396	0.959	0.908	1.6e-119	CK.AMs.c3	PNRC1
GRAMD1A1	5.79e-123	0.523955	0.403	0.173	1.48e-118	CK.AMs.c3	GRAMD1A
NFE2L3	9.76e-123	0.400109	0.36	0.139	2.49e-118	CK.AMs.c3	NFE2L3
TRIM22	3.44e-122	0.599575	0.93	0.8	8.8e-118	CK.AMs.c3	TRIM22
GNB41	1.02e-121	0.572568	0.873	0.683	2.6e-117	CK.AMs.c3	GNB4
SLC41A2	3.01e-121	0.343961	0.309	0.109	7.68e-117	CK.AMs.c3	SLC41A2
CHST11	1.29e-120	0.52027	0.59	0.324	3.29e-116	CK.AMs.c3	CHST11
SLC31A2	2.47e-120	0.55575	0.938	0.803	6.31e-116	CK.AMs.c3	SLC31A2
STAT31	2.64e-120	0.570615	0.873	0.702	6.75e-116	CK.AMs.c3	STAT3
GYPC	1.51e-119	0.5782	0.986	0.964	3.85e-115	CK.AMs.c3	GYPC
FCGR1B	1.94e-119	0.556866	0.62	0.365	4.96e-115	CK.AMs.c3	FCGR1B
CLIC41	6.4e-119	0.554069	0.886	0.728	1.63e-114	CK.AMs.c3	CLIC4
ASCL2	1.09e-118	0.308786	0.278	0.092	2.79e-114	CK.AMs.c3	ASCL2
PFKP	4.29e-118	0.456318	0.423	0.185	1.1e-113	CK.AMs.c3	PFKP
ACTR3	1.4e-117	0.461281	0.992	0.973	3.58e-113	CK.AMs.c3	ACTR3
TNIP11	2.12e-115	0.443983	0.417	0.185	5.41e-111	CK.AMs.c3	TNIP1
DEK	2.48e-115	0.513764	0.977	0.934	6.32e-111	CK.AMs.c3	DEK
CTSB2	4.99e-115	0.619285	0.998	0.994	1.27e-110	CK.AMs.c3	CTSB
JAK12	2.83e-114	0.573269	0.939	0.812	7.23e-110	CK.AMs.c3	JAK1
LPCAT2	1.74e-113	0.553744	0.85	0.644	4.46e-109	CK.AMs.c3	LPCAT2
PTPN21	5.64e-112	0.608988	0.838	0.653	1.44e-107	CK.AMs.c3	PTPN2
TNFAIP31	1.33e-111	0.843662	0.636	0.418	3.39e-107	CK.AMs.c3	TNFAIP3
SLC8A11	4.76e-111	0.590034	0.853	0.667	1.22e-106	CK.AMs.c3	SLC8A1
DNAJA11	5.48e-111	0.491463	0.996	0.97	1.4e-106	CK.AMs.c3	DNAJA1
TNS3	1.62e-110	0.56024	0.814	0.594	4.14e-106	CK.AMs.c3	TNS3
PDIA3	1.11e-109	0.530719	0.974	0.907	2.85e-105	CK.AMs.c3	PDIA3
ALAS1	1.27e-109	0.643188	0.959	0.853	3.23e-105	CK.AMs.c3	ALAS1
IKBKE	6.17e-108	0.267331	0.259	0.087	1.58e-103	CK.AMs.c3	IKBKE
PSMA6	1.54e-107	0.446977	0.985	0.965	3.94e-103	CK.AMs.c3	PSMA6
PIK3AP11	1.69e-107	0.554541	0.836	0.634	4.32e-103	CK.AMs.c3	PIK3AP1
RCN1	3.43e-107	0.509375	0.543	0.297	8.76e-103	CK.AMs.c3	RCN1
HLA-DPA12	4e-107	0.425132	1	1	1.02e-102	CK.AMs.c3	HLA-DPA1
CFLAR1	2.73e-106	0.610809	0.84	0.672	6.98e-102	CK.AMs.c3	CFLAR
ATP6V1B2	5.11e-105	0.519415	0.929	0.818	1.31e-100	CK.AMs.c3	ATP6V1B2
TXN	5.51e-105	0.730017	0.999	0.998	1.41e-100	CK.AMs.c3	TXN
FBXO6	1.22e-104	0.501555	0.644	0.402	3.12e-100	CK.AMs.c3	FBXO6
SRGN2	2.96e-104	0.503872	1	0.999	7.57e-100	CK.AMs.c3	SRGN
LHFPL22	5.22e-104	0.572167	0.618	0.371	1.33e-99	CK.AMs.c3	LHFPL2
CTSZ	5.73e-104	0.500298	1	0.998	1.46e-99	CK.AMs.c3	CTSZ
KLHL52	6.03e-104	0.288444	0.292	0.106	1.54e-99	CK.AMs.c3	KLHL5
SCIMP	9.68e-104	0.540886	0.857	0.697	2.47e-99	CK.AMs.c3	SCIMP
PLGRKT	1.05e-103	0.528469	0.748	0.524	2.68e-99	CK.AMs.c3	PLGRKT
IL1RN1	1.7e-103	0.988296	0.677	0.457	4.35e-99	CK.AMs.c3	IL1RN
MX1	3.5e-102	0.654394	0.858	0.66	8.93e-98	CK.AMs.c3	MX1
DTX3L	5.43e-101	0.514844	0.793	0.585	1.39e-96	CK.AMs.c3	DTX3L
P2RY131	8.69e-101	0.719746	0.567	0.337	2.22e-96	CK.AMs.c3	P2RY13
CDC42SE2	2.45e-100	0.481979	0.668	0.432	6.27e-96	CK.AMs.c3	CDC42SE2
CD74	3.49e-100	0.32541	1	1	8.91e-96	CK.AMs.c3	CD74
GM2A1	1.98e-99	0.603159	0.913	0.791	5.06e-95	CK.AMs.c3	GM2A
B4GALT12	2.63e-99	0.549607	0.734	0.526	6.71e-95	CK.AMs.c3	B4GALT1
OAS2	3.13e-98	0.512454	0.773	0.541	7.99e-94	CK.AMs.c3	OAS2
CYB5A2	4.27e-98	0.504564	0.97	0.897	1.09e-93	CK.AMs.c3	CYB5A
ITPR2	7.3e-98	0.553208	0.869	0.69	1.86e-93	CK.AMs.c3	ITPR2
PRELID1	2.35e-97	0.432464	0.987	0.955	6.01e-93	CK.AMs.c3	PRELID1
RHBDF2	2.45e-97	0.323693	0.348	0.147	6.25e-93	CK.AMs.c3	RHBDF2
BCL2A11	3.41e-97	0.576869	0.97	0.913	8.7e-93	CK.AMs.c3	BCL2A1
SMAP22	5.09e-97	0.520328	0.865	0.695	1.3e-92	CK.AMs.c3	SMAP2
PTPRE1	6.05e-97	0.651028	0.598	0.365	1.55e-92	CK.AMs.c3	PTPRE
NAMPT2	2.05e-96	0.689938	0.954	0.89	5.22e-92	CK.AMs.c3	NAMPT
LILRB12	2.87e-96	0.537439	0.701	0.471	7.32e-92	CK.AMs.c3	LILRB1
ATP6V1A	4.79e-96	0.484454	0.893	0.745	1.22e-91	CK.AMs.c3	ATP6V1A
CCRL21	9.39e-96	0.541626	0.578	0.353	2.4e-91	CK.AMs.c3	CCRL2
CTSL2	1.21e-95	0.745183	0.995	0.983	3.09e-91	CK.AMs.c3	CTSL
FCGR3A2	1.54e-95	0.480103	0.991	0.987	3.94e-91	CK.AMs.c3	FCGR3A
TPM4	1.65e-95	0.563956	0.955	0.886	4.22e-91	CK.AMs.c3	TPM4
TUT11	1.66e-95	0.312995	0.27	0.1	4.24e-91	CK.AMs.c3	TUT1
HLA-DQB1	2.98e-95	0.431273	1	0.999	7.61e-91	CK.AMs.c3	HLA-DQB1
IL6ST1	6.25e-95	0.511129	0.688	0.461	1.6e-90	CK.AMs.c3	IL6ST
HLA-DPB12	8.12e-95	0.416414	1	1	2.07e-90	CK.AMs.c3	HLA-DPB1
IGFLR11	3.96e-94	0.498053	0.62	0.386	1.01e-89	CK.AMs.c3	IGFLR1
ATP1B1	4.49e-94	0.531965	0.979	0.956	1.15e-89	CK.AMs.c3	ATP1B1
KIAA0040	6.22e-94	0.307031	0.331	0.137	1.59e-89	CK.AMs.c3	KIAA0040
HLA-DMB1	1.69e-93	0.507984	0.982	0.944	4.31e-89	CK.AMs.c3	HLA-DMB
NFKBIE1	5.15e-93	0.381565	0.411	0.195	1.32e-88	CK.AMs.c3	NFKBIE
S100A92	1.01e-92	0.637266	0.998	0.997	2.58e-88	CK.AMs.c3	S100A9
HNRNPC1	1.2e-92	0.435338	0.975	0.937	3.06e-88	CK.AMs.c3	HNRNPC
NCOA42	4.39e-92	0.525749	0.917	0.813	1.12e-87	CK.AMs.c3	NCOA4
CHMP5	1.87e-91	0.413119	0.978	0.925	4.79e-87	CK.AMs.c3	CHMP5
DMXL22	2.2e-91	0.532605	0.807	0.619	5.62e-87	CK.AMs.c3	DMXL2
SLFN5	9.96e-91	0.53999	0.728	0.521	2.54e-86	CK.AMs.c3	SLFN5
IRF7	1.36e-90	0.472297	0.61	0.373	3.48e-86	CK.AMs.c3	IRF7
HLA-DRA2	2.83e-90	0.400696	1	1	7.23e-86	CK.AMs.c3	HLA-DRA
ITPRIPL2	3.12e-90	0.528223	0.714	0.506	7.96e-86	CK.AMs.c3	ITPRIPL2
TRIM69	4.83e-90	0.432904	0.589	0.353	1.23e-85	CK.AMs.c3	TRIM69
ISG15	1.23e-89	0.8103	0.93	0.802	3.14e-85	CK.AMs.c3	ISG15
FKBP5	1.62e-89	0.579139	0.767	0.567	4.14e-85	CK.AMs.c3	FKBP5
CXCL81	1.94e-89	1.12869	0.27	0.103	4.95e-85	CK.AMs.c3	CXCL8
HCK1	5.28e-89	0.482174	0.932	0.809	1.35e-84	CK.AMs.c3	HCK
XAF1	5.34e-89	0.529304	0.856	0.684	1.36e-84	CK.AMs.c3	XAF1
MYD881	5.92e-89	0.492315	0.944	0.851	1.51e-84	CK.AMs.c3	MYD88
LCP21	3.09e-88	0.502298	0.796	0.617	7.88e-84	CK.AMs.c3	LCP2
ACTB	3.61e-88	0.414377	1	1	9.22e-84	CK.AMs.c3	ACTB
TMEM165	1.59e-87	0.433386	0.937	0.816	4.05e-83	CK.AMs.c3	TMEM165
UBE2Z	1.74e-87	0.425051	0.672	0.449	4.45e-83	CK.AMs.c3	UBE2Z
SAMSN11	7.08e-87	0.549393	0.639	0.423	1.81e-82	CK.AMs.c3	SAMSN1
B4GALT51	1.1e-86	0.579772	0.609	0.402	2.8e-82	CK.AMs.c3	B4GALT5
LPIN2	1.92e-86	0.536869	0.809	0.66	4.91e-82	CK.AMs.c3	LPIN2
UBE2D1	2.3e-85	0.488185	0.847	0.701	5.86e-81	CK.AMs.c3	UBE2D1
EPB41L32	3.58e-85	0.520544	0.757	0.566	9.14e-81	CK.AMs.c3	EPB41L3
ADAR	3.92e-85	0.429175	0.913	0.78	1e-80	CK.AMs.c3	ADAR
MOB1A	5.85e-85	0.401227	0.983	0.935	1.49e-80	CK.AMs.c3	MOB1A
ZNF2671	2.07e-84	0.468238	0.543	0.325	5.29e-80	CK.AMs.c3	ZNF267
PDE4DIP2	2.7e-84	0.575684	0.876	0.722	6.91e-80	CK.AMs.c3	PDE4DIP
SDCBP1	3.9e-84	0.361302	0.999	0.995	9.96e-80	CK.AMs.c3	SDCBP
APOL4	4.7e-84	0.595186	0.7	0.505	1.2e-79	CK.AMs.c3	APOL4
SSB	1.27e-83	0.451244	0.984	0.926	3.25e-79	CK.AMs.c3	SSB
C5orf56	1.34e-83	0.353254	0.48	0.258	3.43e-79	CK.AMs.c3	C5orf56
PEA152	1.53e-83	0.48047	0.559	0.343	3.9e-79	CK.AMs.c3	PEA15
TLR81	1.67e-83	0.493836	0.642	0.426	4.26e-79	CK.AMs.c3	TLR8
PSMA5	2.4e-83	0.453794	0.922	0.819	6.14e-79	CK.AMs.c3	PSMA5
IFNAR11	3.85e-83	0.478173	0.815	0.634	9.84e-79	CK.AMs.c3	IFNAR1
SCARB2	4.73e-83	0.467413	0.938	0.838	1.21e-78	CK.AMs.c3	SCARB2
RUFY32	9.21e-83	0.481198	0.629	0.415	2.35e-78	CK.AMs.c3	RUFY3
HLA-DQA11	1.45e-82	0.531344	1	0.999	3.71e-78	CK.AMs.c3	HLA-DQA1
GPX32	1.54e-82	0.397024	0.434	0.219	3.93e-78	CK.AMs.c3	GPX3
OAS3	6.56e-82	0.511283	0.703	0.479	1.68e-77	CK.AMs.c3	OAS3
CD53	8.67e-82	0.40261	0.979	0.922	2.21e-77	CK.AMs.c3	CD53
FCER1G	2.02e-81	0.347381	1	1	5.17e-77	CK.AMs.c3	FCER1G
SOCS31	2.03e-81	0.521097	0.522	0.3	5.2e-77	CK.AMs.c3	SOCS3
OAS1	2.8e-81	0.472146	0.808	0.636	7.14e-77	CK.AMs.c3	OAS1
GADD45B2	3.61e-81	0.458038	0.505	0.282	9.23e-77	CK.AMs.c3	GADD45B
RBMS1	3.77e-81	0.516979	0.878	0.759	9.63e-77	CK.AMs.c3	RBMS1
LRRK2	3.89e-81	0.362494	0.345	0.159	9.94e-77	CK.AMs.c3	LRRK2
LILRB22	7.84e-81	0.408863	0.398	0.197	2e-76	CK.AMs.c3	LILRB2
LILRB3	1.02e-80	0.472216	0.727	0.534	2.62e-76	CK.AMs.c3	LILRB3
BCL61	4.4e-80	0.377702	0.484	0.267	1.12e-75	CK.AMs.c3	BCL6
NFE2L21	1.09e-79	0.468809	0.932	0.849	2.79e-75	CK.AMs.c3	NFE2L2
TAGAP	2.97e-79	0.402629	0.424	0.219	7.58e-75	CK.AMs.c3	TAGAP
PML	9.68e-79	0.369555	0.516	0.297	2.47e-74	CK.AMs.c3	PML
LCP1	1.89e-78	0.393922	0.997	0.992	4.84e-74	CK.AMs.c3	LCP1
CLEC4E2	1.91e-78	0.917025	0.576	0.386	4.88e-74	CK.AMs.c3	CLEC4E
NCK11	1.91e-78	0.453493	0.853	0.702	4.88e-74	CK.AMs.c3	NCK1
CMTM6	4.75e-78	0.363951	0.976	0.933	1.21e-73	CK.AMs.c3	CMTM6
TNFRSF141	4.89e-78	0.455046	0.675	0.475	1.25e-73	CK.AMs.c3	TNFRSF14
FAS	7.25e-78	0.328047	0.325	0.146	1.85e-73	CK.AMs.c3	FAS
PRDX11	2.33e-77	0.425857	1	0.998	5.96e-73	CK.AMs.c3	PRDX1
PIM31	4.12e-77	0.469938	0.551	0.341	1.05e-72	CK.AMs.c3	PIM3
RAPGEF21	7.27e-77	0.419388	0.553	0.336	1.86e-72	CK.AMs.c3	RAPGEF2
PDCD1LG2	7.48e-77	0.33021	0.454	0.241	1.91e-72	CK.AMs.c3	PDCD1LG2
ARAP2	1.48e-76	0.444489	0.487	0.282	3.78e-72	CK.AMs.c3	ARAP2
CLEC2B	2.08e-76	0.416191	0.931	0.833	5.32e-72	CK.AMs.c3	CLEC2B
GRINA1	2.39e-76	0.39526	0.965	0.89	6.11e-72	CK.AMs.c3	GRINA
TOP1	5.52e-76	0.447989	0.92	0.811	1.41e-71	CK.AMs.c3	TOP1
RAB13	7.81e-76	0.459929	0.939	0.846	2e-71	CK.AMs.c3	RAB13
TRAFD1	9.61e-76	0.326922	0.423	0.221	2.45e-71	CK.AMs.c3	TRAFD1
CD801	1.27e-75	0.287499	0.302	0.132	3.24e-71	CK.AMs.c3	CD80
APOBEC3G	1.86e-75	0.335609	0.486	0.271	4.75e-71	CK.AMs.c3	APOBEC3G
TANK1	2.27e-75	0.444166	0.817	0.66	5.8e-71	CK.AMs.c3	TANK
PSMB3	2.4e-75	0.434251	0.972	0.91	6.13e-71	CK.AMs.c3	PSMB3
DDX60	4.59e-75	0.406964	0.619	0.403	1.17e-70	CK.AMs.c3	DDX60
GSAP	1.43e-74	0.450489	0.797	0.615	3.66e-70	CK.AMs.c3	GSAP
SP100	1.66e-74	0.407813	0.945	0.838	4.23e-70	CK.AMs.c3	SP100
NUP62	6.96e-74	0.361368	0.505	0.293	1.78e-69	CK.AMs.c3	NUP62
KCNMA12	1.29e-73	0.498321	0.63	0.415	3.3e-69	CK.AMs.c3	KCNMA1
SNRPG	4.99e-73	0.357202	0.98	0.927	1.27e-68	CK.AMs.c3	SNRPG
SERPING11	6.93e-73	0.459378	0.987	0.972	1.77e-68	CK.AMs.c3	SERPING1
SECTM1	3.74e-72	0.412071	0.621	0.402	9.56e-68	CK.AMs.c3	SECTM1
NFKBIA1	4.98e-72	0.817088	0.876	0.807	1.27e-67	CK.AMs.c3	NFKBIA
UBE2L3	8.74e-72	0.359123	0.966	0.888	2.23e-67	CK.AMs.c3	UBE2L3
ETV6	1.58e-71	0.373465	0.647	0.429	4.05e-67	CK.AMs.c3	ETV6
2022-03-12	4.61e-71	0.447706	0.898	0.781	1.18e-66	CK.AMs.c3	2022-03-01
RB1	1.52e-70	0.429088	0.677	0.483	3.89e-66	CK.AMs.c3	RB1
FAM241A	1.59e-70	0.387689	0.427	0.232	4.05e-66	CK.AMs.c3	FAM241A
WSB11	4.04e-70	0.456357	0.941	0.873	1.03e-65	CK.AMs.c3	WSB1
PIM1	5.41e-70	0.507591	0.515	0.315	1.38e-65	CK.AMs.c3	PIM1
SUSD6	6.84e-70	0.390591	0.617	0.412	1.75e-65	CK.AMs.c3	SUSD6
FPR21	1.04e-69	0.394727	0.543	0.326	2.65e-65	CK.AMs.c3	FPR2
GLS	1.22e-69	0.42714	0.738	0.552	3.11e-65	CK.AMs.c3	GLS
PTPRJ2	2.13e-69	0.399638	0.534	0.335	5.44e-65	CK.AMs.c3	PTPRJ
RILPL21	4.19e-69	0.425262	0.83	0.679	1.07e-64	CK.AMs.c3	RILPL2
SFT2D2	7.45e-69	0.440166	0.764	0.6	1.9e-64	CK.AMs.c3	SFT2D2
CEBPD2	4.88e-68	0.5046	0.632	0.422	1.25e-63	CK.AMs.c3	CEBPD
KARS	1.21e-67	0.380527	0.679	0.486	3.09e-63	CK.AMs.c3	KARS
ADGRE2	1.61e-67	0.28806	0.286	0.127	4.12e-63	CK.AMs.c3	ADGRE2
CD721	2.36e-67	0.262784	0.299	0.135	6.02e-63	CK.AMs.c3	CD72
DNAJC7	6.68e-67	0.386076	0.87	0.734	1.71e-62	CK.AMs.c3	DNAJC7
PPIF2	7.07e-67	0.434576	0.565	0.364	1.81e-62	CK.AMs.c3	PPIF
GNS1	7.99e-67	0.4294	0.913	0.8	2.04e-62	CK.AMs.c3	GNS
VMP12	8.08e-67	0.528285	0.872	0.75	2.06e-62	CK.AMs.c3	VMP1
DDX58	1.03e-66	0.439545	0.583	0.382	2.64e-62	CK.AMs.c3	DDX58
ACP22	1.94e-66	0.459568	0.572	0.386	4.96e-62	CK.AMs.c3	ACP2
SNX6	2.47e-66	0.341165	0.97	0.926	6.31e-62	CK.AMs.c3	SNX6
HIF1A2	5.26e-66	0.562151	0.612	0.416	1.34e-61	CK.AMs.c3	HIF1A
TLR1	1.71e-65	0.36708	0.52	0.322	4.37e-61	CK.AMs.c3	TLR1
C1QB	1.78e-65	0.351095	0.999	1	4.54e-61	CK.AMs.c3	C1QB
CMPK2	1.81e-65	0.374625	0.442	0.248	4.63e-61	CK.AMs.c3	CMPK2
ACSL4	2.45e-65	0.445528	0.757	0.574	6.25e-61	CK.AMs.c3	ACSL4
KCTD122	1.03e-64	0.426797	0.918	0.838	2.63e-60	CK.AMs.c3	KCTD12
ARMH1	1.4e-64	0.438155	0.497	0.304	3.58e-60	CK.AMs.c3	ARMH1
HLA-DOA	1.44e-64	0.409938	0.677	0.489	3.69e-60	CK.AMs.c3	HLA-DOA
NAPA	3.51e-64	0.392576	0.712	0.53	8.96e-60	CK.AMs.c3	NAPA
FAM49B	5.06e-64	0.367415	0.941	0.846	1.29e-59	CK.AMs.c3	FAM49B
BID1	6.43e-64	0.437723	0.934	0.84	1.64e-59	CK.AMs.c3	BID
PTMA	9.47e-64	0.26586	1	1	2.42e-59	CK.AMs.c3	PTMA
ATP2A2	3e-63	0.416737	0.714	0.533	7.66e-59	CK.AMs.c3	ATP2A2
CUL1	3.9e-63	0.375251	0.584	0.385	9.96e-59	CK.AMs.c3	CUL1
TBC1D2B1	7.29e-63	0.322424	0.47	0.276	1.86e-58	CK.AMs.c3	TBC1D2B
H3F3B1	7.82e-63	0.325286	0.998	0.997	2e-58	CK.AMs.c3	H3F3B
SLC31A1	7.93e-63	0.450569	0.864	0.758	2.03e-58	CK.AMs.c3	SLC31A1
PTPN11	1.63e-62	0.454073	0.788	0.637	4.17e-58	CK.AMs.c3	PTPN1
DESI1	2.91e-62	0.36283	0.793	0.612	7.44e-58	CK.AMs.c3	DESI1
CD822	3e-62	0.380072	0.59	0.396	7.66e-58	CK.AMs.c3	CD82
C5orf15	1.18e-61	0.367102	0.623	0.438	3.02e-57	CK.AMs.c3	C5orf15
BTN2A2	1.6e-61	0.357698	0.608	0.413	4.09e-57	CK.AMs.c3	BTN2A2
UBXN4	2.21e-61	0.353953	0.968	0.917	5.64e-57	CK.AMs.c3	UBXN4
LY961	2.89e-61	0.343407	0.973	0.928	7.38e-57	CK.AMs.c3	LY96
CALR	6.75e-61	0.405742	0.984	0.953	1.72e-56	CK.AMs.c3	CALR
RBM471	7.34e-61	0.396867	0.921	0.816	1.87e-56	CK.AMs.c3	RBM47
GIMAP7	1.45e-60	0.276653	0.258	0.115	3.71e-56	CK.AMs.c3	GIMAP7
ACTN1	1.66e-60	0.384563	0.934	0.83	4.23e-56	CK.AMs.c3	ACTN1
TMEM106A	2.19e-60	0.302838	0.404	0.224	5.6e-56	CK.AMs.c3	TMEM106A
ARFGAP31	3.02e-60	0.398854	0.744	0.579	7.7e-56	CK.AMs.c3	ARFGAP3
GSDMD	3.92e-60	0.382036	0.652	0.47	1e-55	CK.AMs.c3	GSDMD
RSU1	9.92e-60	0.381859	0.839	0.696	2.53e-55	CK.AMs.c3	RSU1
MRAS	2.04e-59	0.359716	0.552	0.36	5.22e-55	CK.AMs.c3	MRAS
SLC20A11	2.08e-59	0.317611	0.371	0.201	5.31e-55	CK.AMs.c3	SLC20A1
BST21	5.14e-59	0.34405	0.98	0.936	1.31e-54	CK.AMs.c3	BST2
CYLD	5.71e-59	0.398066	0.668	0.489	1.46e-54	CK.AMs.c3	CYLD
ENO1	8.26e-59	0.344941	0.974	0.914	2.11e-54	CK.AMs.c3	ENO1
VCPIP1	1.56e-58	0.376625	0.608	0.422	3.99e-54	CK.AMs.c3	VCPIP1
FMNL22	3.41e-58	0.396955	0.83	0.693	8.71e-54	CK.AMs.c3	FMNL2
TBC1D91	1.11e-57	0.402728	0.704	0.539	2.83e-53	CK.AMs.c3	TBC1D9
SASH1	5.9e-57	0.405234	0.533	0.353	1.51e-52	CK.AMs.c3	SASH1
HAVCR2	6.68e-57	0.391224	0.709	0.546	1.71e-52	CK.AMs.c3	HAVCR2
RAB101	9.18e-57	0.326957	0.977	0.911	2.34e-52	CK.AMs.c3	RAB10
GABARAP	1.3e-56	0.267479	1	0.999	3.33e-52	CK.AMs.c3	GABARAP
ZFP36L12	1.39e-56	0.50446	0.749	0.578	3.54e-52	CK.AMs.c3	ZFP36L1
CRYBG11	2.93e-56	0.383206	0.704	0.544	7.49e-52	CK.AMs.c3	CRYBG1
SLC43A21	3.95e-56	0.41671	0.655	0.479	1.01e-51	CK.AMs.c3	SLC43A2
GADD45G	4.72e-56	0.348062	0.282	0.137	1.21e-51	CK.AMs.c3	GADD45G
CD142	4.92e-56	0.523665	0.856	0.719	1.26e-51	CK.AMs.c3	CD14
CIR1	6.48e-56	0.379656	0.85	0.733	1.66e-51	CK.AMs.c3	CIR1
EFHD2	6.72e-56	0.316253	0.993	0.97	1.72e-51	CK.AMs.c3	EFHD2
ATP6V1G1	7.43e-56	0.275014	0.994	0.99	1.9e-51	CK.AMs.c3	ATP6V1G1
PLAUR1	1.04e-55	0.462934	0.988	0.949	2.66e-51	CK.AMs.c3	PLAUR
ENTPD1	4.72e-55	0.30588	0.375	0.208	1.21e-50	CK.AMs.c3	ENTPD1
RAB8A	5.93e-55	0.338124	0.915	0.816	1.52e-50	CK.AMs.c3	RAB8A
FPR32	1.09e-54	0.539075	0.454	0.284	2.79e-50	CK.AMs.c3	FPR3
PSMB4	1.12e-54	0.370398	0.887	0.764	2.87e-50	CK.AMs.c3	PSMB4
CCDC50	1.37e-54	0.386674	0.824	0.704	3.5e-50	CK.AMs.c3	CCDC50
SUB1	2.82e-54	0.356034	0.982	0.945	7.2e-50	CK.AMs.c3	SUB1
YBX3	4.03e-54	0.36805	0.941	0.853	1.03e-49	CK.AMs.c3	YBX3
PDLIM51	5.34e-54	0.354545	0.741	0.582	1.36e-49	CK.AMs.c3	PDLIM5
USP15	5.72e-54	0.358122	0.87	0.765	1.46e-49	CK.AMs.c3	USP15
IL2RG	6.1e-54	0.383953	0.788	0.657	1.56e-49	CK.AMs.c3	IL2RG
RAB5IF	1.62e-53	0.325625	0.965	0.912	4.14e-49	CK.AMs.c3	RAB5IF
HLA-DMA	1.7e-53	0.296572	1	0.999	4.35e-49	CK.AMs.c3	HLA-DMA
RIPK21	4.01e-53	0.451789	0.549	0.388	1.02e-48	CK.AMs.c3	RIPK2
VPS13C	5.87e-53	0.374358	0.922	0.829	1.5e-48	CK.AMs.c3	VPS13C
ATP1B3	7.28e-53	0.328876	0.969	0.898	1.86e-48	CK.AMs.c3	ATP1B3
SLC25A28	8.94e-53	0.260213	0.427	0.249	2.28e-48	CK.AMs.c3	SLC25A28
LY75	9.43e-53	0.366884	0.655	0.483	2.41e-48	CK.AMs.c3	LY75
VCAN	1.13e-52	0.549223	0.365	0.204	2.89e-48	CK.AMs.c3	VCAN
C1orf542	1.82e-52	0.420611	0.36	0.203	4.64e-48	CK.AMs.c3	C1orf54
ITGB82	2.63e-52	0.726036	0.585	0.44	6.71e-48	CK.AMs.c3	ITGB8
IFNAR2	2.74e-52	0.309469	0.485	0.307	6.99e-48	CK.AMs.c3	IFNAR2
BTG31	2.8e-52	0.33839	0.466	0.291	7.16e-48	CK.AMs.c3	BTG3
UBE2D3	3.52e-52	0.278599	0.99	0.958	8.99e-48	CK.AMs.c3	UBE2D3
TNFAIP81	4.16e-52	0.426696	0.718	0.572	1.06e-47	CK.AMs.c3	TNFAIP8
IL182	7.62e-52	0.624696	0.83	0.741	1.95e-47	CK.AMs.c3	IL18
SQSTM12	1.09e-51	0.41602	0.964	0.905	2.78e-47	CK.AMs.c3	SQSTM1
PRRC2C	1.37e-51	0.306584	0.982	0.937	3.49e-47	CK.AMs.c3	PRRC2C
DICER12	1.86e-51	0.410783	0.804	0.674	4.76e-47	CK.AMs.c3	DICER1
UGP21	2.25e-51	0.33484	0.936	0.849	5.74e-47	CK.AMs.c3	UGP2
CAMK2D	6.06e-51	0.33814	0.537	0.359	1.55e-46	CK.AMs.c3	CAMK2D
SLC25A24	8.25e-51	0.328912	0.907	0.812	2.11e-46	CK.AMs.c3	SLC25A24
HMGA1	1.32e-50	0.324294	0.53	0.352	3.36e-46	CK.AMs.c3	HMGA1
TMEM51	1.7e-50	0.272782	0.398	0.232	4.33e-46	CK.AMs.c3	TMEM51
GSTK1	2.03e-50	0.31536	0.939	0.873	5.18e-46	CK.AMs.c3	GSTK1
AKR1A1	2.59e-50	0.311234	0.958	0.896	6.62e-46	CK.AMs.c3	AKR1A1
OAZ21	3.01e-50	0.299142	0.414	0.25	7.7e-46	CK.AMs.c3	OAZ2
NR1H32	6.22e-50	0.544125	0.53	0.367	1.59e-45	CK.AMs.c3	NR1H3
SGK12	7.72e-50	0.497088	0.622	0.455	1.97e-45	CK.AMs.c3	SGK1
RALGDS	8.82e-50	0.293529	0.47	0.293	2.25e-45	CK.AMs.c3	RALGDS
EIF5A	2.28e-49	0.32978	0.853	0.724	5.81e-45	CK.AMs.c3	EIF5A
EHD11	2.55e-49	0.279309	0.334	0.181	6.52e-45	CK.AMs.c3	EHD1
MITD1	4.28e-49	0.293112	0.505	0.333	1.09e-44	CK.AMs.c3	MITD1
CAPG	5.58e-49	0.3262	0.996	0.982	1.43e-44	CK.AMs.c3	CAPG
PSD32	7.99e-49	0.414764	0.556	0.389	2.04e-44	CK.AMs.c3	PSD3
NPC21	1.14e-48	0.289123	1	0.999	2.9e-44	CK.AMs.c3	NPC2
NADK	2.16e-48	0.278561	0.457	0.285	5.53e-44	CK.AMs.c3	NADK
SERPINB1	2.18e-48	0.316846	0.992	0.964	5.56e-44	CK.AMs.c3	SERPINB1
PFN1	2.48e-48	0.264063	1	1	6.33e-44	CK.AMs.c3	PFN1
ALDH1A1	2.69e-48	0.343988	0.937	0.876	6.88e-44	CK.AMs.c3	ALDH1A1
PTAFR	3.03e-48	0.400195	0.735	0.594	7.74e-44	CK.AMs.c3	PTAFR
TLR71	4.94e-48	0.298568	0.434	0.266	1.26e-43	CK.AMs.c3	TLR7
ISOC2	9.31e-48	0.409778	0.682	0.527	2.38e-43	CK.AMs.c3	ISOC2
UGCG1	9.9e-48	0.466718	0.628	0.472	2.53e-43	CK.AMs.c3	UGCG
NAGK	1.67e-47	0.354882	0.829	0.69	4.28e-43	CK.AMs.c3	NAGK
DPYD1	1.69e-47	0.334044	0.688	0.526	4.33e-43	CK.AMs.c3	DPYD
ACSL5	2.16e-47	0.271248	0.401	0.239	5.52e-43	CK.AMs.c3	ACSL5
FERMT3	3.8e-47	0.328007	0.899	0.798	9.7e-43	CK.AMs.c3	FERMT3
UBC	4.57e-47	0.332419	0.99	0.957	1.17e-42	CK.AMs.c3	UBC
ACOX1	7.94e-47	0.344215	0.721	0.571	2.03e-42	CK.AMs.c3	ACOX1
PPIB	1.08e-46	0.305422	0.99	0.953	2.75e-42	CK.AMs.c3	PPIB
CERS6	1.18e-46	0.35649	0.715	0.567	3.01e-42	CK.AMs.c3	CERS6
RNF19A1	1.7e-46	0.390856	0.695	0.548	4.35e-42	CK.AMs.c3	RNF19A
MBD2	5.27e-46	0.335908	0.922	0.832	1.35e-41	CK.AMs.c3	MBD2
HLA-DQB21	8.95e-46	0.523947	0.655	0.514	2.29e-41	CK.AMs.c3	HLA-DQB2
IRF2	1.19e-45	0.339909	0.81	0.705	3.05e-41	CK.AMs.c3	IRF2
SUCNR1	1.73e-45	0.468372	0.583	0.432	4.43e-41	CK.AMs.c3	SUCNR1
SLC43A31	1.79e-45	0.304426	0.519	0.349	4.57e-41	CK.AMs.c3	SLC43A3
PRKAR2B	1.86e-45	0.339039	0.485	0.32	4.74e-41	CK.AMs.c3	PRKAR2B
TMEM140	1.99e-45	0.291275	0.436	0.274	5.09e-41	CK.AMs.c3	TMEM140
RAB18	2.01e-45	0.310745	0.771	0.63	5.14e-41	CK.AMs.c3	RAB18
ALPK1	2.58e-45	0.301137	0.541	0.371	6.59e-41	CK.AMs.c3	ALPK1
SIGLEC1	2.73e-45	0.320239	0.637	0.462	6.98e-41	CK.AMs.c3	SIGLEC1
AK2	3.52e-45	0.305321	0.576	0.415	8.99e-41	CK.AMs.c3	AK2
ANKRD13A	9.99e-45	0.294594	0.522	0.353	2.55e-40	CK.AMs.c3	ANKRD13A
PHLDA2	1.09e-44	0.311734	0.384	0.226	2.77e-40	CK.AMs.c3	PHLDA2
HSPA5	1.66e-44	0.359348	0.946	0.886	4.23e-40	CK.AMs.c3	HSPA5
SNAP23	1.81e-44	0.315765	0.658	0.494	4.61e-40	CK.AMs.c3	SNAP23
PSMB1	2.56e-44	0.274592	0.972	0.925	6.54e-40	CK.AMs.c3	PSMB1
M6PR	3.8e-44	0.277678	0.979	0.925	9.7e-40	CK.AMs.c3	M6PR
RBM3	3.85e-44	0.272429	0.978	0.957	9.82e-40	CK.AMs.c3	RBM3
IER31	3.96e-44	0.522637	0.444	0.295	1.01e-39	CK.AMs.c3	IER3
PCNX11	4.17e-44	0.357095	0.649	0.499	1.06e-39	CK.AMs.c3	PCNX1
DDX21	5.31e-44	0.331693	0.916	0.831	1.36e-39	CK.AMs.c3	DDX21
ANXA7	5.31e-44	0.293678	0.889	0.769	1.36e-39	CK.AMs.c3	ANXA7
RGS10	5.47e-44	0.33978	0.898	0.798	1.4e-39	CK.AMs.c3	RGS10
MTF11	7.4e-44	0.294206	0.416	0.26	1.89e-39	CK.AMs.c3	MTF1
KPNB1	1.42e-43	0.323902	0.903	0.814	3.63e-39	CK.AMs.c3	KPNB1
C1orf1221	1.54e-43	0.345384	0.779	0.641	3.92e-39	CK.AMs.c3	C1orf122
ABCA12	1.95e-43	0.51964	0.51	0.349	4.97e-39	CK.AMs.c3	ABCA1
LACC11	2.02e-43	0.269362	0.403	0.244	5.16e-39	CK.AMs.c3	LACC1
TBCA	3.21e-43	0.264102	0.988	0.965	8.19e-39	CK.AMs.c3	TBCA
BTN3A2	4.82e-43	0.300285	0.573	0.413	1.23e-38	CK.AMs.c3	BTN3A2
HPS5	8.82e-43	0.306425	0.764	0.621	2.25e-38	CK.AMs.c3	HPS5
RASGEF1B1	2.01e-42	0.326544	0.744	0.585	5.14e-38	CK.AMs.c3	RASGEF1B
GPD21	2.96e-42	0.337435	0.575	0.422	7.56e-38	CK.AMs.c3	GPD2
CLEC7A	3.06e-42	0.348888	0.941	0.905	7.81e-38	CK.AMs.c3	CLEC7A
UBE2E1	3.11e-42	0.287635	0.572	0.412	7.93e-38	CK.AMs.c3	UBE2E1
TGFB1	3.51e-42	0.283437	0.84	0.707	8.97e-38	CK.AMs.c3	TGFB1
NT5C3A	3.53e-42	0.460564	0.685	0.552	9.01e-38	CK.AMs.c3	NT5C3A
BLVRA	4.2e-42	0.327907	0.944	0.886	1.07e-37	CK.AMs.c3	BLVRA
SRSF3	4.51e-42	0.293681	0.921	0.844	1.15e-37	CK.AMs.c3	SRSF3
PARP12	4.58e-42	0.294503	0.632	0.469	1.17e-37	CK.AMs.c3	PARP12
NRP2	4.97e-42	0.387508	0.72	0.555	1.27e-37	CK.AMs.c3	NRP2
MAX	5.1e-42	0.271881	0.657	0.488	1.3e-37	CK.AMs.c3	MAX
BACH11	5.9e-42	0.32246	0.871	0.758	1.51e-37	CK.AMs.c3	BACH1
PILRA	7.54e-42	0.293529	0.959	0.913	1.93e-37	CK.AMs.c3	PILRA
NR3C1	7.98e-42	0.298303	0.887	0.789	2.04e-37	CK.AMs.c3	NR3C1
PSMB6	8.1e-42	0.276541	0.954	0.88	2.07e-37	CK.AMs.c3	PSMB6
STAT5A	9.29e-42	0.291774	0.596	0.436	2.37e-37	CK.AMs.c3	STAT5A
UVRAG	1.02e-41	0.30423	0.561	0.406	2.61e-37	CK.AMs.c3	UVRAG
C3orf38	1.4e-41	0.275262	0.54	0.379	3.57e-37	CK.AMs.c3	C3orf38
ANKRD44	1.47e-41	0.291334	0.569	0.405	3.75e-37	CK.AMs.c3	ANKRD44
OTUD4	1.85e-41	0.315399	0.573	0.414	4.72e-37	CK.AMs.c3	OTUD4
MPP1	2.65e-41	0.30299	0.706	0.565	6.77e-37	CK.AMs.c3	MPP1
AGTRAP	2.74e-41	0.32517	0.73	0.581	7e-37	CK.AMs.c3	AGTRAP
EIF4A1	3.78e-41	0.2766	0.993	0.973	9.66e-37	CK.AMs.c3	EIF4A1
FGR1	4.33e-41	0.306694	0.718	0.563	1.1e-36	CK.AMs.c3	FGR
RAP2B1	5.09e-41	0.324252	0.72	0.589	1.3e-36	CK.AMs.c3	RAP2B
GIMAP2	6.34e-41	0.30134	0.576	0.428	1.62e-36	CK.AMs.c3	GIMAP2
ACO12	9.19e-41	0.356815	0.901	0.837	2.35e-36	CK.AMs.c3	ACO1
SCPEP1	1.14e-40	0.305903	0.959	0.897	2.92e-36	CK.AMs.c3	SCPEP1
IFI61	1.55e-40	0.346341	0.995	0.976	3.97e-36	CK.AMs.c3	IFI6
N4BP11	1.76e-40	0.343711	0.728	0.571	4.49e-36	CK.AMs.c3	N4BP1
RAB1A	1.82e-40	0.276851	0.92	0.833	4.64e-36	CK.AMs.c3	RAB1A
HERC5	2.93e-40	0.388051	0.744	0.621	7.47e-36	CK.AMs.c3	HERC5
MFSD14A	3.66e-40	0.261998	0.503	0.34	9.36e-36	CK.AMs.c3	MFSD14A
HNRNPF	4.48e-40	0.270595	0.934	0.834	1.14e-35	CK.AMs.c3	HNRNPF
CPM2	4.56e-40	0.395272	0.853	0.756	1.17e-35	CK.AMs.c3	CPM
DIAPH2	5e-40	0.302214	0.652	0.495	1.28e-35	CK.AMs.c3	DIAPH2
MAFB2	5.13e-40	0.485908	0.594	0.451	1.31e-35	CK.AMs.c3	MAFB
PLAC8	1.27e-39	0.772358	0.761	0.661	3.25e-35	CK.AMs.c3	PLAC8
CDKN1A1	1.32e-39	0.449459	0.43	0.278	3.38e-35	CK.AMs.c3	CDKN1A
WDFY1	3.73e-39	0.295414	0.582	0.429	9.53e-35	CK.AMs.c3	WDFY1
RNF114	7.83e-39	0.298747	0.645	0.503	2e-34	CK.AMs.c3	RNF114
HNRNPA2B1	9.82e-39	0.257431	0.995	0.982	2.51e-34	CK.AMs.c3	HNRNPA2B1
WTAP1	9.88e-39	0.331021	0.713	0.572	2.52e-34	CK.AMs.c3	WTAP
ABI1	1.49e-38	0.305584	0.776	0.648	3.81e-34	CK.AMs.c3	ABI1
HNRNPR	1.87e-38	0.285011	0.91	0.819	4.79e-34	CK.AMs.c3	HNRNPR
ST3GAL5	2.14e-38	0.274435	0.461	0.308	5.46e-34	CK.AMs.c3	ST3GAL5
DDX60L	2.77e-38	0.338639	0.787	0.68	7.09e-34	CK.AMs.c3	DDX60L
LMO41	2.78e-38	0.351125	0.816	0.715	7.11e-34	CK.AMs.c3	LMO4
EAF11	3.65e-38	0.266207	0.407	0.259	9.32e-34	CK.AMs.c3	EAF1
MNDA	6.13e-38	0.303784	0.995	0.981	1.57e-33	CK.AMs.c3	MNDA
ZEB22	7.44e-38	0.361026	0.946	0.921	1.9e-33	CK.AMs.c3	ZEB2
RNF115	7.58e-38	0.266355	0.55	0.397	1.94e-33	CK.AMs.c3	RNF115
PDXK	9.58e-38	0.282342	0.934	0.834	2.45e-33	CK.AMs.c3	PDXK
FNIP21	1.29e-37	0.403685	0.459	0.313	3.3e-33	CK.AMs.c3	FNIP2
CALCOCO2	1.3e-37	0.299069	0.797	0.686	3.31e-33	CK.AMs.c3	CALCOCO2
PSMB2	1.37e-37	0.280947	0.897	0.796	3.51e-33	CK.AMs.c3	PSMB2
CASP8	1.82e-37	0.327813	0.638	0.5	4.65e-33	CK.AMs.c3	CASP8
NFKBIZ1	2.01e-37	0.311071	0.411	0.264	5.13e-33	CK.AMs.c3	NFKBIZ
HDGF	2.39e-37	0.27832	0.664	0.509	6.11e-33	CK.AMs.c3	HDGF
MAP1LC3A	3.03e-37	0.261256	0.287	0.161	7.75e-33	CK.AMs.c3	MAP1LC3A
TMEM208	3.11e-37	0.284124	0.773	0.652	7.96e-33	CK.AMs.c3	TMEM208
PRPS2	5.38e-37	0.265012	0.455	0.309	1.37e-32	CK.AMs.c3	PRPS2
ASCC3	6.68e-37	0.267444	0.592	0.436	1.71e-32	CK.AMs.c3	ASCC3
FOXN2	9.18e-37	0.27714	0.566	0.418	2.34e-32	CK.AMs.c3	FOXN2
PLEKHA2	1.06e-36	0.296522	0.679	0.547	2.71e-32	CK.AMs.c3	PLEKHA2
BLOC1S6	1.07e-36	0.309333	0.759	0.626	2.73e-32	CK.AMs.c3	BLOC1S6
UBE2E2	1.14e-36	0.2779	0.794	0.685	2.91e-32	CK.AMs.c3	UBE2E2
DUSP10	1.89e-36	0.25025	0.409	0.264	4.83e-32	CK.AMs.c3	DUSP10
HSPA8	1.91e-36	0.251069	0.986	0.974	4.88e-32	CK.AMs.c3	HSPA8
USO1	2.39e-36	0.285491	0.793	0.674	6.11e-32	CK.AMs.c3	USO1
ITPR11	2.51e-36	0.30689	0.497	0.347	6.41e-32	CK.AMs.c3	ITPR1
CHMP4B	3.41e-36	0.282964	0.778	0.653	8.71e-32	CK.AMs.c3	CHMP4B
CRTAM	3.88e-36	0.338589	0.537	0.4	9.9e-32	CK.AMs.c3	CRTAM
MIA3	4.46e-36	0.278862	0.741	0.598	1.14e-31	CK.AMs.c3	MIA3
HNRNPM	4.71e-36	0.277094	0.849	0.722	1.2e-31	CK.AMs.c3	HNRNPM
RBCK1	5.07e-36	0.261783	0.705	0.559	1.29e-31	CK.AMs.c3	RBCK1
CBR1	6.68e-36	0.300563	0.827	0.709	1.71e-31	CK.AMs.c3	CBR1
CLINT1	8.13e-36	0.303889	0.838	0.74	2.08e-31	CK.AMs.c3	CLINT1
SRP54	9.41e-36	0.291588	0.762	0.643	2.4e-31	CK.AMs.c3	SRP54
HNRNPA3	9.45e-36	0.269153	0.953	0.901	2.41e-31	CK.AMs.c3	HNRNPA3
GNA13	1.15e-35	0.300143	0.625	0.487	2.93e-31	CK.AMs.c3	GNA13
IRF9	1.18e-35	0.261533	0.781	0.645	3e-31	CK.AMs.c3	IRF9
SMS2	2.39e-35	0.309431	0.863	0.78	6.09e-31	CK.AMs.c3	SMS
MVP	2.39e-35	0.266897	0.619	0.468	6.12e-31	CK.AMs.c3	MVP
DNAJC3	4e-35	0.3037	0.913	0.845	1.02e-30	CK.AMs.c3	DNAJC3
ITGB21	4.21e-35	0.28113	0.985	0.962	1.08e-30	CK.AMs.c3	ITGB2
NT5C2	5.45e-35	0.260372	0.589	0.434	1.39e-30	CK.AMs.c3	NT5C2
FAM177A1	6.67e-35	0.30572	0.781	0.661	1.7e-30	CK.AMs.c3	FAM177A1
CYC1	9.97e-35	0.283186	0.746	0.614	2.55e-30	CK.AMs.c3	CYC1
SMARCA5	1.15e-34	0.26644	0.886	0.787	2.94e-30	CK.AMs.c3	SMARCA5
ATP6V1H	2.01e-34	0.308506	0.661	0.536	5.13e-30	CK.AMs.c3	ATP6V1H
AGPAT3	2.93e-34	0.263648	0.579	0.429	7.49e-30	CK.AMs.c3	AGPAT3
RAB20	3.09e-34	0.29457	0.586	0.443	7.88e-30	CK.AMs.c3	RAB20
RSPO3	3.13e-34	0.671979	0.378	0.256	7.98e-30	CK.AMs.c3	RSPO3
MALAT12	4.64e-34	0.352134	0.998	0.992	1.18e-29	CK.AMs.c3	MALAT1
MYCBP2	5.41e-34	0.290151	0.795	0.678	1.38e-29	CK.AMs.c3	MYCBP2
PLEKHO21	6.32e-34	0.297607	0.679	0.548	1.61e-29	CK.AMs.c3	PLEKHO2
FNDC3B1	6.36e-34	0.309877	0.9	0.839	1.62e-29	CK.AMs.c3	FNDC3B
ABCF1	9.61e-34	0.268415	0.648	0.511	2.46e-29	CK.AMs.c3	ABCF1
NABP11	1.03e-33	0.365747	0.617	0.474	2.63e-29	CK.AMs.c3	NABP1
G3BP11	1.05e-33	0.296668	0.794	0.683	2.68e-29	CK.AMs.c3	G3BP1
IFI44	1.12e-33	0.28849	0.631	0.486	2.85e-29	CK.AMs.c3	IFI44
CTSO	1.25e-33	0.272734	0.553	0.411	3.19e-29	CK.AMs.c3	CTSO
NASP	1.25e-33	0.277596	0.62	0.479	3.2e-29	CK.AMs.c3	NASP
SFPQ1	1.62e-33	0.285347	0.824	0.709	4.14e-29	CK.AMs.c3	SFPQ
RRAGC	1.85e-33	0.279077	0.667	0.534	4.71e-29	CK.AMs.c3	RRAGC
HLA-DRB11	2.03e-33	0.344511	1	1	5.18e-29	CK.AMs.c3	HLA-DRB1
NECAP2	2.91e-33	0.273984	0.826	0.735	7.43e-29	CK.AMs.c3	NECAP2
RELA1	4.53e-33	0.265015	0.435	0.3	1.16e-28	CK.AMs.c3	RELA
SSPN	5.42e-33	0.278955	0.372	0.242	1.38e-28	CK.AMs.c3	SSPN
TNIK2	6.5e-33	0.334401	0.509	0.371	1.66e-28	CK.AMs.c3	TNIK
IFIT5	6.74e-33	0.277023	0.56	0.425	1.72e-28	CK.AMs.c3	IFIT5
CGAS	8.85e-33	0.264749	0.522	0.379	2.26e-28	CK.AMs.c3	CGAS
RHOU	1.19e-32	0.282487	0.53	0.393	3.04e-28	CK.AMs.c3	RHOU
DENND5A	1.25e-32	0.275872	0.807	0.698	3.2e-28	CK.AMs.c3	DENND5A
CASP51	1.33e-32	0.25531	0.358	0.227	3.41e-28	CK.AMs.c3	CASP5
GPR651	1.46e-32	0.325036	0.768	0.667	3.74e-28	CK.AMs.c3	GPR65
ITGAV1	1.53e-32	0.330481	0.462	0.33	3.91e-28	CK.AMs.c3	ITGAV
SLC11A21	2.63e-32	0.301532	0.512	0.373	6.72e-28	CK.AMs.c3	SLC11A2
EIF1AY	3.11e-32	0.297351	0.408	0.28	7.93e-28	CK.AMs.c3	EIF1AY
PBDC1	4.74e-32	0.257663	0.851	0.737	1.21e-27	CK.AMs.c3	PBDC1
PHF11	5.11e-32	0.25321	0.689	0.554	1.3e-27	CK.AMs.c3	PHF11
ARID4B	8.85e-32	0.257072	0.805	0.692	2.26e-27	CK.AMs.c3	ARID4B
AKAP9	9.49e-32	0.293605	0.914	0.853	2.42e-27	CK.AMs.c3	AKAP9
RNF181	1.46e-31	0.250909	0.938	0.864	3.73e-27	CK.AMs.c3	RNF181
ERLIN1	1.5e-31	0.263055	0.56	0.423	3.82e-27	CK.AMs.c3	ERLIN1
NUPR12	1.5e-31	0.420788	0.926	0.892	3.82e-27	CK.AMs.c3	NUPR1
CD831	2.02e-31	0.346403	0.806	0.698	5.16e-27	CK.AMs.c3	CD83
SMCHD1	2.66e-31	0.296996	0.68	0.549	6.8e-27	CK.AMs.c3	SMCHD1
ABCE1	2.97e-31	0.267493	0.654	0.519	7.57e-27	CK.AMs.c3	ABCE1
PTPN12	6.12e-31	0.263385	0.937	0.885	1.56e-26	CK.AMs.c3	PTPN12
FLOT1	7.03e-31	0.27454	0.782	0.678	1.8e-26	CK.AMs.c3	FLOT1
PRCP1	7.81e-31	0.25729	0.462	0.323	1.99e-26	CK.AMs.c3	PRCP
LIPA2	1.02e-30	0.339856	0.898	0.826	2.6e-26	CK.AMs.c3	LIPA
C1QC1	1.07e-30	0.270743	0.997	0.996	2.74e-26	CK.AMs.c3	C1QC
UBE2S	1.14e-30	0.250584	0.521	0.384	2.91e-26	CK.AMs.c3	UBE2S
FUS	1.37e-30	0.264408	0.784	0.667	3.5e-26	CK.AMs.c3	FUS
MAT2B	1.66e-30	0.260865	0.696	0.581	4.23e-26	CK.AMs.c3	MAT2B
SPART	1.67e-30	0.264006	0.746	0.627	4.27e-26	CK.AMs.c3	SPART
CCR11	1.71e-30	0.332771	0.576	0.449	4.36e-26	CK.AMs.c3	CCR1
IFITM21	3.12e-30	0.282368	0.645	0.507	7.96e-26	CK.AMs.c3	IFITM2
PDCD5	3.26e-30	0.255391	0.838	0.733	8.32e-26	CK.AMs.c3	PDCD5
ENPP4	3.36e-30	0.282953	0.817	0.716	8.59e-26	CK.AMs.c3	ENPP4
ATP13A31	5.66e-30	0.379176	0.561	0.425	1.44e-25	CK.AMs.c3	ATP13A3
PDIA6	8.02e-30	0.258558	0.931	0.858	2.05e-25	CK.AMs.c3	PDIA6
CTSC1	1.05e-29	0.251945	1	1	2.69e-25	CK.AMs.c3	CTSC
UBE2J11	1.18e-29	0.276267	0.713	0.602	3.01e-25	CK.AMs.c3	UBE2J1
FGD2	1.41e-29	0.253339	0.587	0.448	3.61e-25	CK.AMs.c3	FGD2
SRSF7	1.71e-29	0.261896	0.901	0.796	4.36e-25	CK.AMs.c3	SRSF7
ACBD5	1.72e-29	0.257743	0.648	0.517	4.4e-25	CK.AMs.c3	ACBD5
C2	2.14e-29	0.364074	0.682	0.581	5.47e-25	CK.AMs.c3	C2
IER21	2.27e-29	0.278739	0.604	0.478	5.81e-25	CK.AMs.c3	IER2
TSFM	2.47e-29	0.265751	0.526	0.401	6.32e-25	CK.AMs.c3	TSFM
NOTCH22	4.26e-29	0.25774	0.546	0.42	1.09e-24	CK.AMs.c3	NOTCH2
IL7R1	9.54e-29	0.537257	0.81	0.708	2.44e-24	CK.AMs.c3	IL7R
SGTB	1.31e-28	0.257776	0.301	0.187	3.35e-24	CK.AMs.c3	SGTB
ANOS1	1.51e-28	0.270822	0.675	0.559	3.85e-24	CK.AMs.c3	ANOS1
GTF2B	1.95e-28	0.270842	0.734	0.626	4.98e-24	CK.AMs.c3	GTF2B
C6orf62	3.09e-28	0.268189	0.886	0.805	7.88e-24	CK.AMs.c3	C6orf62
IGF2R	3.99e-28	0.294284	0.87	0.778	1.02e-23	CK.AMs.c3	IGF2R
FCHO22	5.41e-28	0.294701	0.733	0.643	1.38e-23	CK.AMs.c3	FCHO2
TRADD	1.27e-27	0.253202	0.634	0.505	3.24e-23	CK.AMs.c3	TRADD
ARL8B	1.3e-27	0.278985	0.818	0.741	3.32e-23	CK.AMs.c3	ARL8B
CREBL21	2.28e-27	0.26092	0.598	0.479	5.83e-23	CK.AMs.c3	CREBL2
DAPK11	2.67e-27	0.251806	0.736	0.614	6.81e-23	CK.AMs.c3	DAPK1
FTX1	4.4e-27	0.330303	0.651	0.535	1.12e-22	CK.AMs.c3	FTX
ASAP1	4.82e-27	0.254835	0.8	0.693	1.23e-22	CK.AMs.c3	ASAP1
MYO1G	9.97e-27	0.286299	0.584	0.464	2.55e-22	CK.AMs.c3	MYO1G
FAM107B1	1.97e-26	0.285905	0.897	0.854	5.03e-22	CK.AMs.c3	FAM107B
CUL2	2.11e-26	0.253078	0.638	0.52	5.4e-22	CK.AMs.c3	CUL2
MMP2-AS12	2.83e-26	0.279628	0.254	0.154	7.22e-22	CK.AMs.c3	MMP2-AS1
PPP1R181	3.77e-26	0.281727	0.668	0.572	9.63e-22	CK.AMs.c3	PPP1R18
MCMBP	7.03e-26	0.259416	0.556	0.44	1.8e-21	CK.AMs.c3	MCMBP
DPH3	4.03e-25	0.253719	0.801	0.696	1.03e-20	CK.AMs.c3	DPH3
TSC22D11	4.4e-25	0.313751	0.427	0.312	1.12e-20	CK.AMs.c3	TSC22D1
CD842	6.12e-25	0.356872	0.546	0.436	1.56e-20	CK.AMs.c3	CD84
SAMD9	1.89e-24	0.275326	0.721	0.614	4.84e-20	CK.AMs.c3	SAMD9
TUBA1C1	1.77e-23	0.277801	0.764	0.664	4.52e-19	CK.AMs.c3	TUBA1C
PTGER41	2.4e-23	0.258074	0.792	0.7	6.12e-19	CK.AMs.c3	PTGER4
BMP2K2	3.65e-23	0.257235	0.596	0.485	9.32e-19	CK.AMs.c3	BMP2K
CD69	4.65e-23	0.404098	0.448	0.33	1.19e-18	CK.AMs.c3	CD69
LITAF1	1.4e-22	0.250292	1	0.995	3.57e-18	CK.AMs.c3	LITAF
VOPP1	1.6e-22	0.258528	0.699	0.61	4.08e-18	CK.AMs.c3	VOPP1
ADGRE12	4.41e-22	0.263468	0.446	0.337	1.13e-17	CK.AMs.c3	ADGRE1
ELL22	6.82e-22	0.253899	0.577	0.476	1.74e-17	CK.AMs.c3	ELL2
PRXL2A	2.11e-21	0.259078	0.399	0.292	5.39e-17	CK.AMs.c3	PRXL2A
ZFP361	3.2e-21	0.301265	0.784	0.703	8.17e-17	CK.AMs.c3	ZFP36
CXCL52	3.41e-21	0.461264	0.325	0.221	8.7e-17	CK.AMs.c3	CXCL5
AP1S2	4.76e-21	0.266657	0.576	0.472	1.22e-16	CK.AMs.c3	AP1S2
CD551	4.87e-20	0.284182	0.844	0.782	1.24e-15	CK.AMs.c3	CD55
APOE2	1.52e-19	0.262876	0.998	0.996	3.89e-15	CK.AMs.c3	APOE
CEP350	1.82e-19	0.257487	0.831	0.751	4.65e-15	CK.AMs.c3	CEP350
MT1F1	6.84e-19	0.28609	0.334	0.24	1.75e-14	CK.AMs.c3	MT1F
RGS12	3.26e-18	0.342963	0.401	0.302	8.33e-14	CK.AMs.c3	RGS1
RALA	5.12e-16	0.307605	0.611	0.519	1.31e-11	CK.AMs.c3	RALA
CCL181	2.2e-14	0.988593	0.82	0.759	5.63e-10	CK.AMs.c3	CCL18
PLTP2	4.66e-13	0.25373	0.297	0.215	1.19e-08	CK.AMs.c3	PLTP
IFIT1	2.55e-11	0.27544	0.596	0.509	6.51e-07	CK.AMs.c3	IFIT1
TIMP12	9.64e-11	0.374798	0.858	0.816	2.46e-06	CK.AMs.c3	TIMP1
IL1B1	1.18e-10	0.904747	0.477	0.419	3.01e-06	CK.AMs.c3	IL1B
LGMN1	4.58e-10	0.497379	0.358	0.291	1.17e-05	CK.AMs.c3	LGMN
HLA-DQA21	4.05e-08	0.370636	0.655	0.651	0.001035	CK.AMs.c3	HLA-DQA2
CCL42	4.5e-32	0.95797	0.521	0.106	1.15e-27	CK.AMs.c4	CCL4
CCL201	5.88e-19	1.20128	0.268	0.047	1.5e-14	CK.AMs.c4	CCL20
CXCL31	4.49e-15	1.24799	0.972	0.596	1.15e-10	CK.AMs.c4	CXCL3
EGR1	1.74e-14	0.458755	0.268	0.057	4.46e-10	CK.AMs.c4	EGR1
CXCL53	6.7e-14	1.34759	0.549	0.222	1.71e-09	CK.AMs.c4	CXCL5
FN1	8.2e-12	0.67843	0.972	0.875	2.1e-07	CK.AMs.c4	FN1
ATP5F1E	2.13e-11	0.507498	1	1	5.44e-07	CK.AMs.c4	ATP5F1E
LIPA3	2.23e-11	0.851254	0.972	0.827	5.7e-07	CK.AMs.c4	LIPA
CCL182	2.01e-10	0.64562	0.944	0.76	5.14e-06	CK.AMs.c4	CCL18
TGM2	2.34e-10	0.758781	0.972	0.827	5.99e-06	CK.AMs.c4	TGM2
PHLDA11	9.5e-10	0.632672	0.394	0.155	2.43e-05	CK.AMs.c4	PHLDA1
SOD23	2.26e-09	0.252187	0.958	0.766	5.77e-05	CK.AMs.c4	SOD2
SCD1	4.72e-09	0.407233	0.972	0.93	0.00012056	CK.AMs.c4	SCD
CLEC7A1	6.95e-09	0.479224	1	0.905	0.000177394	CK.AMs.c4	CLEC7A
CCL4L23	8.55e-09	0.561563	0.366	0.139	0.000218261	CK.AMs.c4	CCL4L2
MAFB3	1.3e-08	0.637651	0.761	0.453	0.00033308	CK.AMs.c4	MAFB
CTSL3	1.63e-08	0.397429	1	0.983	0.00041618	CK.AMs.c4	CTSL
CXCL22	1.81e-08	0.715824	0.563	0.301	0.000462289	CK.AMs.c4	CXCL2
AC026369.31	3.76e-08	0.609533	0.986	0.906	0.000960701	CK.AMs.c4	AC026369.3
KLF61	2.65e-07	0.521439	0.958	0.783	0.00676059	CK.AMs.c4	KLF6
CTNNB1	3.87e-07	0.462541	0.972	0.86	0.00989149	CK.AMs.c4	CTNNB1
LTA4H	4.14e-07	0.388832	1	0.996	0.0105666	CK.AMs.c4	LTA4H
TFRC1	5.9e-07	0.553712	1	0.961	0.0150706	CK.AMs.c4	TFRC
NMT1	7.4e-07	0.301037	0.761	0.451	0.0189073	CK.AMs.c4	NMT1
ATP5MD	1.32e-06	0.412918	0.986	0.991	0.0337214	CK.AMs.c4	ATP5MD
FDX1	1.58e-06	0.430174	0.93	0.829	0.0403933	CK.AMs.c4	FDX1
DSE3	1.89e-06	0.446285	0.915	0.73	0.0483595	CK.AMs.c4	DSE
HIST1H4C	3.46e-06	0.277776	0.817	0.5	0.0882665	CK.AMs.c4	HIST1H4C
DUSP61	4.46e-06	0.530516	0.549	0.346	0.113808	CK.AMs.c4	DUSP6
MSR1	5.26e-06	0.314968	0.986	0.995	0.134421	CK.AMs.c4	MSR1
MYD882	6.44e-06	0.366047	0.944	0.852	0.164396	CK.AMs.c4	MYD88
FABP5	6.51e-06	0.502407	1	0.999	0.166202	CK.AMs.c4	FABP5
FABP44	6.9e-06	0.404573	1	0.999	0.176166	CK.AMs.c4	FABP4
CSTB1	1.41e-05	0.25612	1	1	0.360031	CK.AMs.c4	CSTB
THBD	1.55e-05	0.254019	0.845	0.545	0.39579	CK.AMs.c4	THBD
CD552	1.59e-05	0.458572	0.944	0.783	0.406843	CK.AMs.c4	CD55
SAT13	1.73e-05	0.308937	1	0.996	0.440745	CK.AMs.c4	SAT1
CTSB3	1.74e-05	0.310615	1	0.994	0.444429	CK.AMs.c4	CTSB
FCGR3A3	1.89e-05	0.353998	0.986	0.987	0.481725	CK.AMs.c4	FCGR3A
MALAT13	1.91e-05	0.398477	1	0.993	0.48761	CK.AMs.c4	MALAT1
XPO1	2.07e-05	0.323928	0.845	0.627	0.529772	CK.AMs.c4	XPO1
NAMPT3	2.63e-05	0.453643	0.986	0.891	0.672414	CK.AMs.c4	NAMPT
PRKAR1A	3.54e-05	0.338114	0.958	0.784	0.903375	CK.AMs.c4	PRKAR1A
TRIO	3.81e-05	0.341518	0.845	0.648	0.972568	CK.AMs.c4	TRIO
GALNT1	3.94e-05	0.366775	0.845	0.676	1	CK.AMs.c4	GALNT1
ATP6V1A1	4.03e-05	0.323868	0.901	0.747	1	CK.AMs.c4	ATP6V1A
C6orf621	4.7e-05	0.334062	1	0.806	1	CK.AMs.c4	C6orf62
SLC31A11	5.1e-05	0.333425	0.958	0.76	1	CK.AMs.c4	SLC31A1
PLEK2	5.52e-05	0.299411	1	0.895	1	CK.AMs.c4	PLEK
SNRPE	5.58e-05	0.361426	0.944	0.855	1	CK.AMs.c4	SNRPE
DDX3X1	6.61e-05	0.399459	0.958	0.744	1	CK.AMs.c4	DDX3X
GNB42	6.77e-05	0.318907	0.901	0.686	1	CK.AMs.c4	GNB4
USP3	8.42e-05	0.311961	0.887	0.661	1	CK.AMs.c4	USP3
PRKACB	8.8e-05	0.342439	0.817	0.567	1	CK.AMs.c4	PRKACB
AQP93	9.64e-05	0.394669	0.549	0.363	1	CK.AMs.c4	AQP9
NFKBIZ2	0.000111699	0.340975	0.437	0.266	1	CK.AMs.c4	NFKBIZ
ANXA4	0.00013743	0.348612	0.93	0.813	1	CK.AMs.c4	ANXA4
PLAC81	0.000140171	0.362235	0.789	0.662	1	CK.AMs.c4	PLAC8
NCEH1	0.000142174	0.328327	0.986	0.94	1	CK.AMs.c4	NCEH1
ATP5PF	0.000152963	0.306443	1	0.983	1	CK.AMs.c4	ATP5PF
ZFP36L13	0.000159927	0.38385	0.789	0.58	1	CK.AMs.c4	ZFP36L1
SLA	0.00016564	0.385287	0.944	0.787	1	CK.AMs.c4	SLA
NDUFB1	0.000175241	0.349807	0.986	0.958	1	CK.AMs.c4	NDUFB1
SSR1	0.000180216	0.310231	0.944	0.775	1	CK.AMs.c4	SSR1
RASGEF1B2	0.000189778	0.540296	0.676	0.588	1	CK.AMs.c4	RASGEF1B
ADA22	0.000193457	0.303822	0.958	0.81	1	CK.AMs.c4	ADA2
ZFP362	0.000196531	0.420846	0.873	0.704	1	CK.AMs.c4	ZFP36
SQSTM13	0.00020723	0.347259	0.986	0.906	1	CK.AMs.c4	SQSTM1
LMO42	0.000226545	0.385018	0.887	0.716	1	CK.AMs.c4	LMO4
MAP3K2	0.000239139	0.345116	0.887	0.672	1	CK.AMs.c4	MAP3K2
HSPE1	0.000241719	0.280302	0.986	0.949	1	CK.AMs.c4	HSPE1
PAG1	0.000284216	0.291087	0.915	0.722	1	CK.AMs.c4	PAG1
ARPP19	0.000290334	0.336703	0.803	0.647	1	CK.AMs.c4	ARPP19
KAT2B	0.000294025	0.253342	0.31	0.16	1	CK.AMs.c4	KAT2B
ZEB23	0.000304295	0.274378	0.972	0.921	1	CK.AMs.c4	ZEB2
FNIP22	0.00031652	0.294251	0.493	0.315	1	CK.AMs.c4	FNIP2
CYB5A3	0.000350364	0.303642	0.958	0.897	1	CK.AMs.c4	CYB5A
PLIN21	0.000380265	0.420797	1	0.964	1	CK.AMs.c4	PLIN2
NFE2L22	0.000385992	0.308813	0.93	0.85	1	CK.AMs.c4	NFE2L2
CPEB4	0.00044175	0.290603	0.972	0.805	1	CK.AMs.c4	CPEB4
ZFAND51	0.000463478	0.334247	0.972	0.901	1	CK.AMs.c4	ZFAND5
TSPAN141	0.000464553	0.291621	0.859	0.646	1	CK.AMs.c4	TSPAN14
TNS31	0.000511341	0.348418	0.775	0.597	1	CK.AMs.c4	TNS3
CA2	0.000527581	0.545674	0.563	0.409	1	CK.AMs.c4	CA2
DDX51	0.000570677	0.300965	1	0.974	1	CK.AMs.c4	DDX5
ENY2	0.000582458	0.301112	1	0.949	1	CK.AMs.c4	ENY2
ZFYVE16	0.000600251	0.323849	0.859	0.663	1	CK.AMs.c4	ZFYVE16
SGK3	0.000636099	0.287252	0.915	0.758	1	CK.AMs.c4	SGK3
EGR2	0.000638825	0.460681	0.465	0.312	1	CK.AMs.c4	EGR2
DICER13	0.000683292	0.273838	0.915	0.676	1	CK.AMs.c4	DICER1
ME2	0.00068898	0.260793	0.831	0.605	1	CK.AMs.c4	ME2
PPIC1	0.000784217	0.309597	0.887	0.71	1	CK.AMs.c4	PPIC
GNS2	0.000787992	0.282176	0.915	0.801	1	CK.AMs.c4	GNS
NEAT11	0.000839852	0.369811	0.986	0.947	1	CK.AMs.c4	NEAT1
SNRPD1	0.000870996	0.305489	0.944	0.822	1	CK.AMs.c4	SNRPD1
VMP13	0.000895903	0.325143	0.887	0.751	1	CK.AMs.c4	VMP1
HAVCR21	0.000956746	0.334432	0.662	0.548	1	CK.AMs.c4	HAVCR2
BACH12	0.000973735	0.324853	0.901	0.76	1	CK.AMs.c4	BACH1
RBM472	0.000976491	0.303584	0.958	0.818	1	CK.AMs.c4	RBM47
ADAM10	0.00109986	0.25134	0.887	0.745	1	CK.AMs.c4	ADAM10
ATP5ME	0.00113182	0.256218	0.958	0.892	1	CK.AMs.c4	ATP5ME
ABHD3	0.00115084	0.338788	0.507	0.376	1	CK.AMs.c4	ABHD3
MTCH1	0.00115416	0.268727	0.873	0.68	1	CK.AMs.c4	MTCH1
ACSL13	0.00122857	0.345832	0.634	0.502	1	CK.AMs.c4	ACSL1
ACO13	0.00123218	0.277806	0.944	0.838	1	CK.AMs.c4	ACO1
ADAMTSL4	0.00125214	0.2864	0.944	0.782	1	CK.AMs.c4	ADAMTSL4
RHOB1	0.00125719	0.359014	0.873	0.729	1	CK.AMs.c4	RHOB
CYSTM1	0.00128095	0.254701	0.887	0.7	1	CK.AMs.c4	CYSTM1
TNFAIP23	0.00145176	0.305416	0.93	0.764	1	CK.AMs.c4	TNFAIP2
CITED2	0.00149623	0.352241	0.958	0.831	1	CK.AMs.c4	CITED2
UFM1	0.00149767	0.278287	0.915	0.815	1	CK.AMs.c4	UFM1
PHACTR1	0.00169717	0.351092	0.831	0.66	1	CK.AMs.c4	PHACTR1
PTPRE2	0.00170159	0.356966	0.507	0.368	1	CK.AMs.c4	PTPRE
ARRDC41	0.00179007	0.291632	0.831	0.673	1	CK.AMs.c4	ARRDC4
PRNP	0.00180547	0.324268	0.718	0.595	1	CK.AMs.c4	PRNP
KDELR2	0.00197061	0.252721	0.972	0.762	1	CK.AMs.c4	KDELR2
TUBA1A	0.00202543	0.35051	0.845	0.677	1	CK.AMs.c4	TUBA1A
LYN3	0.00206708	0.266206	0.972	0.844	1	CK.AMs.c4	LYN
B4GALT13	0.00242397	0.335224	0.62	0.529	1	CK.AMs.c4	B4GALT1
SRGN3	0.00267683	0.30242	1	0.999	1	CK.AMs.c4	SRGN
RPS4Y1	0.00269959	0.322861	0.718	0.544	1	CK.AMs.c4	RPS4Y1
KDM6B1	0.00291317	0.316102	0.521	0.402	1	CK.AMs.c4	KDM6B
OGFRL1	0.00305083	0.254813	0.901	0.705	1	CK.AMs.c4	OGFRL1
SMCO43	0.0031847	0.353354	0.93	0.907	1	CK.AMs.c4	SMCO4
AC020916.1	0.00340718	0.262488	0.254	0.14	1	CK.AMs.c4	AC020916.1
ATP13A32	0.00352243	0.368866	0.521	0.427	1	CK.AMs.c4	ATP13A3
OTULINL	0.00383722	0.357102	0.592	0.486	1	CK.AMs.c4	OTULINL
TUBA1C2	0.00410456	0.285625	0.831	0.665	1	CK.AMs.c4	TUBA1C
CD2742	0.00457675	0.2965	0.408	0.293	1	CK.AMs.c4	CD274
MACC11	0.00541525	0.286275	0.817	0.639	1	CK.AMs.c4	MACC1
TNFAIP32	0.00545041	0.373602	0.507	0.421	1	CK.AMs.c4	TNFAIP3
CAMTA1	0.0058559	0.289416	0.944	0.811	1	CK.AMs.c4	CAMTA1
STOM3	0.00669412	0.351058	0.958	0.801	1	CK.AMs.c4	STOM
AREG	0.00700278	0.543807	0.254	0.145	1	CK.AMs.c4	AREG
FOSL21	0.00710903	0.334354	0.465	0.373	1	CK.AMs.c4	FOSL2
SNX103	0.00805693	0.299823	1	0.995	1	CK.AMs.c4	SNX10
LINC02154	0.00818202	0.25092	0.479	0.342	1	CK.AMs.c4	LINC02154
MIR3945HG2	0.00848128	0.516166	0.507	0.415	1	CK.AMs.c4	MIR3945HG
SLC8A12	0.00851276	0.254579	0.817	0.669	1	CK.AMs.c4	SLC8A1
GADD45B3	0.00858899	0.405328	0.38	0.285	1	CK.AMs.c4	GADD45B
MT1G	0	3.84663	0.66	0.079	0	MT.AMs	MT1G
MT1X1	0	3.75074	0.82	0.082	0	MT.AMs	MT1X
MT2A3	0	3.73566	1	0.683	0	MT.AMs	MT2A
MT1E1	0	2.78032	0.536	0.081	0	MT.AMs	MT1E
MT1M	0	2.58522	0.362	0.015	0	MT.AMs	MT1M
MT1F2	0	2.16375	0.828	0.225	0	MT.AMs	MT1F
MT1H	0	1.96578	0.29	0.013	0	MT.AMs	MT1H
MT1A	0	1.53917	0.385	0.085	0	MT.AMs	MT1A
FABP51	1.02e-46	0.368466	0.999	0.999	2.6e-42	MT.AMs	FABP5
S100A83	3.9e-29	0.304675	0.963	0.927	9.96e-25	MT.AMs	S100A8
TPM41	1.06e-21	0.250614	0.894	0.887	2.7e-17	MT.AMs	TPM4
FN11	1.32e-21	0.342488	0.903	0.874	3.37e-17	MT.AMs	FN1
CXCL54	1.93e-17	0.592904	0.284	0.221	4.93e-13	MT.AMs	CXCL5
VCAN1	9.49e-14	0.501542	0.256	0.205	2.42e-09	MT.AMs	VCAN
HMOX12	7.4e-13	0.705049	0.81	0.781	1.89e-08	MT.AMs	HMOX1
CSF11	4.07e-10	0.30466	0.311	0.263	1.04e-05	MT.AMs	CSF1
CTSL4	2.4e-09	0.29875	0.982	0.983	6.12e-05	MT.AMs	CTSL
CXCL102	0	2.90232	0.435	0.051	0	IFN.AMs	CXCL10
ISG151	0	2.76926	0.999	0.803	0	IFN.AMs	ISG15
IFIT21	0	2.74467	0.979	0.729	0	IFN.AMs	IFIT2
IFIT11	0	2.72253	0.981	0.506	0	IFN.AMs	IFIT1
RSAD21	0	2.34883	0.893	0.133	0	IFN.AMs	RSAD2
MX11	0	2.34622	0.99	0.66	0	IFN.AMs	MX1
IFIT31	0	2.2307	0.994	0.862	0	IFN.AMs	IFIT3
HERC51	0	2.16992	0.993	0.62	0	IFN.AMs	HERC5
NT5C3A1	0	1.92378	0.965	0.551	0	IFN.AMs	NT5C3A
NEXN1	0	1.77226	0.842	0.21	0	IFN.AMs	NEXN
IFI44L1	0	1.65662	0.952	0.402	0	IFN.AMs	IFI44L
DDX581	0	1.61616	0.88	0.381	0	IFN.AMs	DDX58
CMPK21	0	1.43282	0.85	0.246	0	IFN.AMs	CMPK2
ISG201	0	1.26787	0.396	0.039	0	IFN.AMs	ISG20
USP18	0	0.862769	0.575	0.121	0	IFN.AMs	USP18
HELZ2	0	0.779526	0.546	0.108	0	IFN.AMs	HELZ2
HESX1	0	0.502148	0.31	0.019	0	IFN.AMs	HESX1
OAS21	2e-303	1.37788	0.954	0.541	5.1e-299	IFN.AMs	OAS2
EPSTI11	3.31e-282	1.60473	0.957	0.598	8.46e-278	IFN.AMs	EPSTI1
OAS31	8.21e-268	1.51529	0.888	0.479	2.1e-263	IFN.AMs	OAS3
IFITM31	4.38e-264	1.8506	0.97	0.672	1.12e-259	IFN.AMs	IFITM3
IFIH11	2.77e-260	1.49432	0.888	0.472	7.08e-256	IFN.AMs	IFIH1
TNFSF101	1.47e-258	2.2	0.898	0.517	3.76e-254	IFN.AMs	TNFSF10
SAMD91	8.24e-258	1.37399	0.943	0.613	2.11e-253	IFN.AMs	SAMD9
SAMD9L1	8.33e-241	1.36885	0.975	0.827	2.13e-236	IFN.AMs	SAMD9L
PNPT1	3.07e-240	1.22457	0.819	0.373	7.84e-236	IFN.AMs	PNPT1
TNFSF13B3	9.53e-240	1.35434	0.963	0.788	2.44e-235	IFN.AMs	TNFSF13B
STAT12	3.52e-231	1.21734	0.979	0.792	8.98e-227	IFN.AMs	STAT1
IFI441	5.17e-229	1.16724	0.886	0.485	1.32e-224	IFN.AMs	IFI44
RNF2131	1.82e-227	1.26713	0.989	0.884	4.65e-223	IFN.AMs	RNF213
EIF2AK2	4.55e-227	1.22401	0.975	0.807	1.16e-222	IFN.AMs	EIF2AK2
PARP141	5e-226	1.29543	0.985	0.839	1.28e-221	IFN.AMs	PARP14
DDX60L1	2.67e-218	1.232	0.957	0.679	6.83e-214	IFN.AMs	DDX60L
MX2	5e-214	0.997977	0.77	0.322	1.28e-209	IFN.AMs	MX2
XAF11	1.53e-209	1.20776	0.956	0.685	3.91e-205	IFN.AMs	XAF1
SP1101	4.04e-205	1.17259	0.96	0.742	1.03e-200	IFN.AMs	SP110
PARP91	1.58e-204	1.13208	0.942	0.666	4.04e-200	IFN.AMs	PARP9
GMPR	2.09e-187	0.892311	0.622	0.219	5.34e-183	IFN.AMs	GMPR
RABGAP1L	1.22e-182	1.05914	0.794	0.387	3.11e-178	IFN.AMs	RABGAP1L
ZBP1	2.74e-171	0.419939	0.296	0.056	7e-167	IFN.AMs	ZBP1
IRF71	4.77e-170	0.981744	0.771	0.373	1.22e-165	IFN.AMs	IRF7
TRIM221	8.67e-169	0.975057	0.965	0.801	2.21e-164	IFN.AMs	TRIM22
DYNLT11	5e-165	1.07473	0.97	0.899	1.28e-160	IFN.AMs	DYNLT1
GBP13	1.58e-163	1.26893	0.921	0.707	4.02e-159	IFN.AMs	GBP1
IL271	3.3e-159	0.506756	0.278	0.053	8.44e-155	IFN.AMs	IL27
LAP32	7.53e-159	1.05073	0.985	0.885	1.92e-154	IFN.AMs	LAP3
PLSCR12	1.75e-158	0.955291	0.961	0.832	4.46e-154	IFN.AMs	PLSCR1
IFI62	2.61e-156	1.08823	0.999	0.976	6.65e-152	IFN.AMs	IFI6
OAS11	3.26e-156	1.02623	0.917	0.636	8.33e-152	IFN.AMs	OAS1
STAT21	4.07e-156	0.929749	0.827	0.479	1.04e-151	IFN.AMs	STAT2
STAP1	1.04e-154	0.505987	0.313	0.068	2.65e-150	IFN.AMs	STAP1
HERC6	1.9e-153	0.548225	0.456	0.132	4.84e-149	IFN.AMs	HERC6
IFI162	3.3e-151	0.993306	0.96	0.862	8.44e-147	IFN.AMs	IFI16
SLFN51	2e-149	1.0052	0.852	0.521	5.1e-145	IFN.AMs	SLFN5
APOL61	1.91e-148	0.919683	0.974	0.861	4.87e-144	IFN.AMs	APOL6
GBP42	7.83e-143	1.0078	0.796	0.464	2e-138	IFN.AMs	GBP4
IFI351	3.95e-140	0.97319	0.85	0.55	1.01e-135	IFN.AMs	IFI35
DDX601	2.63e-133	0.828528	0.751	0.403	6.73e-129	IFN.AMs	DDX60
XRN11	5.57e-128	0.897824	0.814	0.53	1.42e-123	IFN.AMs	XRN1
ADAR1	9.4e-126	0.762072	0.945	0.781	2.4e-121	IFN.AMs	ADAR
OASL	3.63e-125	0.991165	0.886	0.61	9.28e-121	IFN.AMs	OASL
ZNFX11	5.36e-120	0.839847	0.817	0.521	1.37e-115	IFN.AMs	ZNFX1
SIGLEC11	1.15e-116	0.783537	0.785	0.462	2.93e-112	IFN.AMs	SIGLEC1
TRIM5	1.81e-115	0.562297	0.525	0.206	4.62e-111	IFN.AMs	TRIM5
PML1	1.3e-114	0.632861	0.636	0.298	3.32e-110	IFN.AMs	PML
DTX3L1	1.55e-112	0.755964	0.856	0.586	3.96e-108	IFN.AMs	DTX3L
SSB1	9.54e-110	0.868892	0.979	0.926	2.44e-105	IFN.AMs	SSB
SP1001	1.96e-105	0.732998	0.945	0.838	5.02e-101	IFN.AMs	SP100
UBE2L61	9.91e-104	0.780261	0.899	0.698	2.53e-99	IFN.AMs	UBE2L6
TAP12	2.13e-103	0.668405	0.662	0.344	5.43e-99	IFN.AMs	TAP1
PSMA41	3.33e-93	0.659516	0.988	0.944	8.49e-89	IFN.AMs	PSMA4
MT2A4	7.92e-91	0.644629	0.916	0.69	2.02e-86	IFN.AMs	MT2A
GCH12	2.62e-88	0.383847	0.256	0.069	6.68e-84	IFN.AMs	GCH1
WARS2	4.58e-88	0.815873	0.881	0.68	1.17e-83	IFN.AMs	WARS
RTCB	6.52e-87	0.644054	0.807	0.56	1.66e-82	IFN.AMs	RTCB
TMEM123	1.1e-85	0.664307	0.929	0.797	2.81e-81	IFN.AMs	TMEM123
TFEC1	1.51e-84	0.631953	0.942	0.785	3.87e-80	IFN.AMs	TFEC
TOR1B	1.58e-84	0.524932	0.584	0.29	4.04e-80	IFN.AMs	TOR1B
RTP4	1.12e-83	0.547409	0.501	0.23	2.87e-79	IFN.AMs	RTP4
MNDA1	9.57e-83	0.62262	0.994	0.981	2.44e-78	IFN.AMs	MNDA
SPATS2L	3.98e-82	0.642738	0.95	0.86	1.02e-77	IFN.AMs	SPATS2L
LY6E1	6.54e-81	0.591846	0.997	0.978	1.67e-76	IFN.AMs	LY6E
LMO2	4.75e-80	0.713978	0.726	0.461	1.21e-75	IFN.AMs	LMO2
PHACTR4	6.57e-79	0.64419	0.676	0.409	1.68e-74	IFN.AMs	PHACTR4
BST22	6.74e-78	0.597474	0.986	0.937	1.72e-73	IFN.AMs	BST2
MYD883	1.69e-77	0.611842	0.956	0.851	4.31e-73	IFN.AMs	MYD88
SHFL	5.6e-76	0.504032	0.535	0.264	1.43e-71	IFN.AMs	SHFL
SCIMP1	7.85e-73	0.629093	0.86	0.698	2e-68	IFN.AMs	SCIMP
IL1RN2	9.02e-73	0.761609	0.731	0.458	2.3e-68	IFN.AMs	IL1RN
TCF4	1.96e-72	0.405822	0.301	0.101	4.99e-68	IFN.AMs	TCF4
NIBAN13	4.4e-72	0.640717	0.896	0.729	1.12e-67	IFN.AMs	NIBAN1
TENT5A	6.42e-72	0.642751	0.828	0.615	1.64e-67	IFN.AMs	TENT5A
CNP	1.26e-71	0.479488	0.526	0.261	3.23e-67	IFN.AMs	CNP
PSMB92	4.18e-70	0.679933	0.952	0.864	1.07e-65	IFN.AMs	PSMB9
STIMATE	4.53e-69	0.573412	0.561	0.306	1.16e-64	IFN.AMs	STIMATE
CHMP51	2.9e-68	0.508702	0.976	0.926	7.42e-64	IFN.AMs	CHMP5
NMI1	6.26e-66	0.626166	0.805	0.608	1.6e-61	IFN.AMs	NMI
RRBP1	4.79e-63	0.545378	0.925	0.805	1.22e-58	IFN.AMs	RRBP1
BAZ1A2	6.04e-63	0.640493	0.886	0.756	1.54e-58	IFN.AMs	BAZ1A
OPTN2	3.11e-61	0.644564	0.738	0.517	7.95e-57	IFN.AMs	OPTN
ZCCHC2	3.42e-61	0.551653	0.842	0.644	8.74e-57	IFN.AMs	ZCCHC2
UNC93B1	7.93e-60	0.519932	0.789	0.56	2.03e-55	IFN.AMs	UNC93B1
BMPR2	2.17e-59	0.520713	0.801	0.593	5.55e-55	IFN.AMs	BMPR2
SPTLC2	3.6e-59	0.478542	0.65	0.4	9.19e-55	IFN.AMs	SPTLC2
LGALS9	6.11e-59	0.491013	0.954	0.846	1.56e-54	IFN.AMs	LGALS9
TRANK1	1e-58	0.403744	0.418	0.193	2.56e-54	IFN.AMs	TRANK1
ZC3HAV1	2.77e-58	0.551278	0.684	0.449	7.08e-54	IFN.AMs	ZC3HAV1
JAK21	5.43e-57	0.496705	0.619	0.378	1.39e-52	IFN.AMs	JAK2
PARP121	8.81e-55	0.490788	0.704	0.469	2.25e-50	IFN.AMs	PARP12
UBE2S1	1.37e-54	0.543151	0.602	0.384	3.51e-50	IFN.AMs	UBE2S
DRAP1	6.03e-54	0.470467	0.953	0.866	1.54e-49	IFN.AMs	DRAP1
IFIT51	6.37e-54	0.464	0.663	0.425	1.63e-49	IFN.AMs	IFIT5
BLVRA1	1.5e-53	0.502622	0.954	0.887	3.84e-49	IFN.AMs	BLVRA
LYSMD21	1.37e-52	0.495945	0.868	0.731	3.49e-48	IFN.AMs	LYSMD2
SMCHD11	5.54e-52	0.546471	0.748	0.549	1.42e-47	IFN.AMs	SMCHD1
CBR11	5.41e-51	0.549906	0.841	0.71	1.38e-46	IFN.AMs	CBR1
AC009950.1	3.29e-50	0.270288	0.274	0.105	8.41e-46	IFN.AMs	AC009950.1
OSBPL1A	7.12e-49	0.477936	0.916	0.819	1.82e-44	IFN.AMs	OSBPL1A
TYMP3	9.09e-49	0.50366	0.975	0.921	2.32e-44	IFN.AMs	TYMP
JADE2	1.85e-48	0.368167	0.4	0.196	4.72e-44	IFN.AMs	JADE2
GIMAP41	5.21e-48	0.535531	0.838	0.692	1.33e-43	IFN.AMs	GIMAP4
CD691	2.28e-47	0.647108	0.56	0.33	5.83e-43	IFN.AMs	CD69
MS4A4A	1.72e-46	0.474158	0.988	0.973	4.39e-42	IFN.AMs	MS4A4A
PHF111	3.59e-46	0.499682	0.734	0.555	9.17e-42	IFN.AMs	PHF11
DHX58	4.62e-46	0.315772	0.374	0.179	1.18e-41	IFN.AMs	DHX58
ACSL14	1.44e-45	0.553915	0.712	0.5	3.68e-41	IFN.AMs	ACSL1
USP25	1.86e-45	0.428853	0.767	0.564	4.75e-41	IFN.AMs	USP25
IFITM22	3.44e-45	0.534674	0.711	0.508	8.77e-41	IFN.AMs	IFITM2
NCOA7	1.94e-44	0.508311	0.704	0.514	4.95e-40	IFN.AMs	NCOA7
GNB43	2.77e-44	0.469483	0.828	0.685	7.08e-40	IFN.AMs	GNB4
NUB11	4.21e-44	0.466608	0.823	0.668	1.07e-39	IFN.AMs	NUB1
CCR12	2.89e-43	0.51819	0.657	0.449	7.38e-39	IFN.AMs	CCR1
CHROMR	9.41e-43	0.317998	0.395	0.199	2.4e-38	IFN.AMs	CHROMR
FBXO61	1.34e-42	0.422992	0.618	0.403	3.41e-38	IFN.AMs	FBXO6
PPM1K	1.35e-42	0.425007	0.655	0.444	3.44e-38	IFN.AMs	PPM1K
RIN2	1.73e-42	0.405294	0.576	0.362	4.42e-38	IFN.AMs	RIN2
PHACTR2	2.24e-42	0.469922	0.861	0.723	5.72e-38	IFN.AMs	PHACTR2
TRIM56	2.55e-42	0.401876	0.612	0.394	6.52e-38	IFN.AMs	TRIM56
PIK3AP12	3.25e-42	0.442847	0.802	0.635	8.31e-38	IFN.AMs	PIK3AP1
HLA-E2	3.7e-42	0.387041	0.989	0.982	9.45e-38	IFN.AMs	HLA-E
MLKL	3.91e-42	0.420093	0.632	0.415	9.98e-38	IFN.AMs	MLKL
GTF2B1	1.58e-41	0.535305	0.76	0.626	4.03e-37	IFN.AMs	GTF2B
NAMPT4	3.31e-41	0.443042	0.947	0.891	8.46e-37	IFN.AMs	NAMPT
NRIP1	3.79e-41	0.517732	0.891	0.78	9.69e-37	IFN.AMs	NRIP1
SLC25A281	4.63e-41	0.396297	0.445	0.25	1.18e-36	IFN.AMs	SLC25A28
SCARB21	6.74e-41	0.442324	0.91	0.839	1.72e-36	IFN.AMs	SCARB2
APOL11	7.33e-41	0.473941	0.629	0.434	1.87e-36	IFN.AMs	APOL1
SOCS11	1.71e-40	0.562208	0.503	0.299	4.38e-36	IFN.AMs	SOCS1
STARD4	2.32e-40	0.429132	0.435	0.24	5.92e-36	IFN.AMs	STARD4
MYOF1	3.02e-40	0.468279	0.823	0.691	7.72e-36	IFN.AMs	MYOF
STAC3	3.96e-40	0.443903	0.64	0.449	1.01e-35	IFN.AMs	STAC3
RAB8B	1.19e-39	0.440558	0.813	0.659	3.03e-35	IFN.AMs	RAB8B
RUBCN	1.81e-39	0.335068	0.393	0.208	4.61e-35	IFN.AMs	RUBCN
NUPR13	2.43e-39	0.916941	0.91	0.892	6.21e-35	IFN.AMs	NUPR1
ANKFY1	9.47e-39	0.3934	0.562	0.368	2.42e-34	IFN.AMs	ANKFY1
SECTM11	4.74e-38	0.418263	0.601	0.403	1.21e-33	IFN.AMs	SECTM1
DNAJA12	7.04e-38	0.3869	0.988	0.97	1.8e-33	IFN.AMs	DNAJA1
IRF21	1.32e-37	0.407916	0.832	0.706	3.38e-33	IFN.AMs	IRF2
APPL1	1.47e-37	0.396479	0.91	0.835	3.76e-33	IFN.AMs	APPL1
PI4K2B	1.88e-37	0.366622	0.425	0.24	4.81e-33	IFN.AMs	PI4K2B
PATL1	2.24e-37	0.373854	0.554	0.359	5.73e-33	IFN.AMs	PATL1
SNX61	2.38e-37	0.380616	0.976	0.926	6.08e-33	IFN.AMs	SNX6
USP151	5.1e-37	0.393933	0.875	0.766	1.3e-32	IFN.AMs	USP15
TRIM34	5.95e-37	0.330279	0.526	0.323	1.52e-32	IFN.AMs	TRIM34
PSMB81	6.87e-37	0.401433	0.954	0.899	1.76e-32	IFN.AMs	PSMB8
BAG1	8.08e-37	0.415672	0.831	0.701	2.06e-32	IFN.AMs	BAG1
SHISA5	9.29e-37	0.373433	0.758	0.582	2.37e-32	IFN.AMs	SHISA5
NCF13	1.03e-36	0.644392	0.72	0.566	2.64e-32	IFN.AMs	NCF1
MIR3945HG3	1.05e-36	0.638716	0.604	0.414	2.69e-32	IFN.AMs	MIR3945HG
RBCK11	1.11e-36	0.424182	0.719	0.559	2.83e-32	IFN.AMs	RBCK1
TRIM25	1.16e-36	0.436805	0.604	0.412	2.96e-32	IFN.AMs	TRIM25
PCGF5	1.51e-36	0.43109	0.734	0.571	3.85e-32	IFN.AMs	PCGF5
APOBEC3G1	2.81e-36	0.369931	0.463	0.273	7.19e-32	IFN.AMs	APOBEC3G
TRIM14	4.95e-36	0.406785	0.864	0.748	1.26e-31	IFN.AMs	TRIM14
TRIM21	5.55e-36	0.378126	0.583	0.392	1.42e-31	IFN.AMs	TRIM21
TAGAP1	6.83e-36	0.36648	0.4	0.22	1.74e-31	IFN.AMs	TAGAP
SP140L	1.19e-35	0.33475	0.573	0.369	3.04e-31	IFN.AMs	SP140L
NT5C21	2.91e-35	0.392361	0.625	0.434	7.44e-31	IFN.AMs	NT5C2
C5orf561	3.75e-35	0.337353	0.442	0.26	9.59e-31	IFN.AMs	C5orf56
SEPTIN4	1.28e-34	0.300852	0.337	0.17	3.26e-30	IFN.AMs	SEPTIN4
RBMS11	2.58e-34	0.405123	0.88	0.76	6.59e-30	IFN.AMs	RBMS1
BLZF1	4.59e-34	0.366331	0.511	0.325	1.17e-29	IFN.AMs	BLZF1
LILRB13	8.38e-34	0.388863	0.659	0.472	2.14e-29	IFN.AMs	LILRB1
LPIN21	1.54e-33	0.446256	0.805	0.661	3.92e-29	IFN.AMs	LPIN2
SRP541	2.32e-33	0.392329	0.789	0.644	5.93e-29	IFN.AMs	SRP54
SEMA4D1	7.3e-33	0.332527	0.424	0.246	1.86e-28	IFN.AMs	SEMA4D
APC	7.4e-32	0.407308	0.729	0.571	1.89e-27	IFN.AMs	APC
MSR11	2.13e-31	0.397323	0.994	0.995	5.44e-27	IFN.AMs	MSR1
H3F3B2	2.4e-31	0.330224	0.999	0.997	6.14e-27	IFN.AMs	H3F3B
AP5B1	3.49e-31	0.380369	0.668	0.506	8.91e-27	IFN.AMs	AP5B1
APOL21	3.74e-31	0.306458	0.474	0.29	9.54e-27	IFN.AMs	APOL2
MEF2A	6.49e-31	0.358171	0.807	0.666	1.66e-26	IFN.AMs	MEF2A
WSB12	1.31e-30	0.435471	0.921	0.873	3.35e-26	IFN.AMs	WSB1
CD2743	1.75e-30	0.366915	0.464	0.292	4.48e-26	IFN.AMs	CD274
RBM43	1.89e-30	0.323251	0.46	0.283	4.83e-26	IFN.AMs	RBM43
GPR180	2.74e-30	0.323497	0.388	0.226	6.99e-26	IFN.AMs	GPR180
N4BP12	6.58e-30	0.430399	0.716	0.572	1.68e-25	IFN.AMs	N4BP1
SETX	7.51e-30	0.356116	0.907	0.796	1.92e-25	IFN.AMs	SETX
WASHC4	8.12e-30	0.384893	0.82	0.68	2.08e-25	IFN.AMs	WASHC4
SLC27A3	1.14e-29	0.360966	0.715	0.558	2.91e-25	IFN.AMs	SLC27A3
RASGEF1B3	2.52e-29	0.417164	0.741	0.586	6.42e-25	IFN.AMs	RASGEF1B
STAT32	2.59e-29	0.376118	0.812	0.704	6.62e-25	IFN.AMs	STAT3
ST3GAL51	6.4e-29	0.336081	0.481	0.309	1.63e-24	IFN.AMs	ST3GAL5
MIA31	1.23e-28	0.342039	0.758	0.599	3.13e-24	IFN.AMs	MIA3
TDRD7	1.45e-28	0.338544	0.422	0.263	3.7e-24	IFN.AMs	TDRD7
CGAS1	1.65e-28	0.350188	0.554	0.38	4.22e-24	IFN.AMs	CGAS
HAVCR22	1.69e-28	0.427972	0.691	0.547	4.31e-24	IFN.AMs	HAVCR2
PPP2R2A	1.79e-28	0.349222	0.602	0.431	4.58e-24	IFN.AMs	PPP2R2A
LYN4	2.28e-28	0.362981	0.909	0.843	5.82e-24	IFN.AMs	LYN
DDX3X2	3.93e-28	0.354012	0.859	0.743	1e-23	IFN.AMs	DDX3X
QSER1	5.6e-28	0.356675	0.596	0.431	1.43e-23	IFN.AMs	QSER1
SIGLEC14	8.41e-28	0.32083	0.471	0.304	2.15e-23	IFN.AMs	SIGLEC14
SH3GLB1	8.5e-28	0.327289	0.924	0.881	2.17e-23	IFN.AMs	SH3GLB1
KIAA00401	8.81e-28	0.252797	0.276	0.139	2.25e-23	IFN.AMs	KIAA0040
NAGK1	1.29e-27	0.411615	0.795	0.691	3.29e-23	IFN.AMs	NAGK
DOCK8	1.61e-27	0.335933	0.949	0.898	4.11e-23	IFN.AMs	DOCK8
C6orf622	2.06e-27	0.33624	0.906	0.806	5.27e-23	IFN.AMs	C6orf62
SFT2D21	2.12e-27	0.386081	0.738	0.601	5.41e-23	IFN.AMs	SFT2D2
TRIM691	2.22e-27	0.317341	0.528	0.355	5.66e-23	IFN.AMs	TRIM69
SP140	2.51e-27	0.363685	0.532	0.367	6.4e-23	IFN.AMs	SP140
BBX	2.76e-27	0.369346	0.819	0.731	7.05e-23	IFN.AMs	BBX
PPA11	3.44e-27	0.384685	0.837	0.746	8.8e-23	IFN.AMs	PPA1
HK2	3.58e-27	0.360405	0.706	0.552	9.14e-23	IFN.AMs	HK2
SAMD4A	8.43e-27	0.284515	0.368	0.216	2.15e-22	IFN.AMs	SAMD4A
SPPL2A1	9.16e-27	0.344919	0.9	0.828	2.34e-22	IFN.AMs	SPPL2A
PARP10	1.04e-26	0.274945	0.391	0.234	2.67e-22	IFN.AMs	PARP10
CLEC7A2	1.09e-26	0.358053	0.956	0.905	2.78e-22	IFN.AMs	CLEC7A
TAP21	1.6e-26	0.30011	0.506	0.335	4.07e-22	IFN.AMs	TAP2
PLEKHO12	1.89e-26	0.323809	0.388	0.229	4.82e-22	IFN.AMs	PLEKHO1
TPM3	2.1e-26	0.279948	0.999	0.995	5.36e-22	IFN.AMs	TPM3
KIAA1109	4.43e-26	0.311962	0.655	0.489	1.13e-21	IFN.AMs	KIAA1109
RNF19A2	5.07e-26	0.328206	0.711	0.549	1.3e-21	IFN.AMs	RNF19A
VAMP52	7.36e-26	0.748656	0.463	0.321	1.88e-21	IFN.AMs	VAMP5
GPBP1	1.18e-25	0.325108	0.769	0.627	3.01e-21	IFN.AMs	GPBP1
TPM42	3.46e-25	0.376049	0.942	0.887	8.84e-21	IFN.AMs	TPM4
KLF62	6.57e-25	0.422305	0.859	0.783	1.68e-20	IFN.AMs	KLF6
PLAAT3	2.13e-24	0.331124	0.978	0.946	5.43e-20	IFN.AMs	PLAAT3
RNF19B2	2.5e-24	0.269031	0.432	0.272	6.38e-20	IFN.AMs	RNF19B
SAMHD1	4.73e-24	0.281558	0.992	0.973	1.21e-19	IFN.AMs	SAMHD1
USP30-AS11	4.96e-24	0.319559	0.62	0.462	1.27e-19	IFN.AMs	USP30-AS1
MRPL17	5.42e-24	0.31574	0.712	0.576	1.38e-19	IFN.AMs	MRPL17
AKAP7	8.4e-24	0.293595	0.532	0.374	2.15e-19	IFN.AMs	AKAP7
CAST	1.17e-23	0.262401	0.997	0.993	2.98e-19	IFN.AMs	CAST
SPATA13	1.18e-23	0.353821	0.58	0.429	3.02e-19	IFN.AMs	SPATA13
STX17	1.25e-23	0.275678	0.474	0.318	3.19e-19	IFN.AMs	STX17
CD2AP	1.46e-23	0.284314	0.496	0.333	3.73e-19	IFN.AMs	CD2AP
ETNK1	2.63e-23	0.300138	0.745	0.606	6.73e-19	IFN.AMs	ETNK1
DEK1	3.58e-23	0.319065	0.958	0.934	9.14e-19	IFN.AMs	DEK
DEFB1	3.67e-23	0.606762	0.547	0.394	9.38e-19	IFN.AMs	DEFB1
EFR3A	5.7e-23	0.317197	0.828	0.718	1.46e-18	IFN.AMs	EFR3A
MAFB4	6.73e-23	0.409515	0.604	0.452	1.72e-18	IFN.AMs	MAFB
TGFB11	7.21e-23	0.320123	0.812	0.708	1.84e-18	IFN.AMs	TGFB1
FMR1	8.56e-23	0.292074	0.548	0.395	2.19e-18	IFN.AMs	FMR1
TRIM38	1.17e-22	0.308459	0.87	0.777	2.99e-18	IFN.AMs	TRIM38
CMC2	1.28e-22	0.327642	0.809	0.727	3.27e-18	IFN.AMs	CMC2
TLK2	1.43e-22	0.2625	0.485	0.329	3.66e-18	IFN.AMs	TLK2
NHLRC3	1.44e-22	0.336001	0.731	0.605	3.68e-18	IFN.AMs	NHLRC3
MRC1	1.48e-22	0.308021	0.997	0.991	3.77e-18	IFN.AMs	MRC1
MYL12A	1.51e-22	0.27788	1	0.999	3.87e-18	IFN.AMs	MYL12A
LILRA5	2.34e-22	0.303585	0.435	0.285	5.98e-18	IFN.AMs	LILRA5
LEPROTL1	3.1e-22	0.278765	0.935	0.9	7.93e-18	IFN.AMs	LEPROTL1
MRAS1	3.78e-22	0.28162	0.517	0.361	9.65e-18	IFN.AMs	MRAS
DTNA	6.76e-22	0.353196	0.269	0.148	1.73e-17	IFN.AMs	DTNA
SASH11	1.33e-21	0.367343	0.493	0.354	3.4e-17	IFN.AMs	SASH1
IRF12	1.33e-21	0.333548	0.77	0.651	3.41e-17	IFN.AMs	IRF1
RICTOR	2.21e-21	0.255031	0.398	0.254	5.65e-17	IFN.AMs	RICTOR
EHD4	2.39e-21	0.330465	0.756	0.638	6.11e-17	IFN.AMs	EHD4
PANK2	2.64e-21	0.279671	0.55	0.401	6.73e-17	IFN.AMs	PANK2
TRIP12	2.97e-21	0.292787	0.837	0.728	7.58e-17	IFN.AMs	TRIP12
NADK1	5.79e-21	0.251374	0.431	0.286	1.48e-16	IFN.AMs	NADK
BRCA2	6.59e-21	0.308968	0.418	0.276	1.68e-16	IFN.AMs	BRCA2
RUNX1	7.58e-21	0.293827	0.907	0.821	1.93e-16	IFN.AMs	RUNX1
ARHGAP25	1.01e-20	0.252004	0.555	0.399	2.58e-16	IFN.AMs	ARHGAP25
RSBN1L	1.03e-20	0.297509	0.706	0.573	2.64e-16	IFN.AMs	RSBN1L
STOM4	1.38e-20	0.353861	0.884	0.8	3.52e-16	IFN.AMs	STOM
CARD16	1.69e-20	0.258453	0.985	0.967	4.32e-16	IFN.AMs	CARD16
NAPA1	1.78e-20	0.289107	0.662	0.532	4.56e-16	IFN.AMs	NAPA
HERPUD2	2e-20	0.271237	0.565	0.421	5.11e-16	IFN.AMs	HERPUD2
SAV1	2.1e-20	0.295591	0.688	0.562	5.38e-16	IFN.AMs	SAV1
CASP1	2.13e-20	0.303168	0.903	0.833	5.45e-16	IFN.AMs	CASP1
SIDT2	2.15e-20	0.316587	0.694	0.576	5.49e-16	IFN.AMs	SIDT2
DMXL1	2.66e-20	0.289938	0.564	0.418	6.8e-16	IFN.AMs	DMXL1
CXorf21	2.91e-20	0.279554	0.388	0.252	7.44e-16	IFN.AMs	CXorf21
CASP81	2.96e-20	0.312344	0.632	0.501	7.57e-16	IFN.AMs	CASP8
KPNB11	3.54e-20	0.29988	0.885	0.815	9.04e-16	IFN.AMs	KPNB1
ITPRIPL21	3.82e-20	0.288053	0.652	0.508	9.76e-16	IFN.AMs	ITPRIPL2
TMEM50A	6.44e-20	0.274328	0.978	0.947	1.65e-15	IFN.AMs	TMEM50A
SLCO2B1	6.53e-20	0.300255	0.938	0.879	1.67e-15	IFN.AMs	SLCO2B1
INHBA	7.14e-20	0.427158	0.938	0.892	1.82e-15	IFN.AMs	INHBA
YME1L1	8.83e-20	0.280935	0.812	0.715	2.25e-15	IFN.AMs	YME1L1
MAML2	9.1e-20	0.280492	0.758	0.626	2.33e-15	IFN.AMs	MAML2
CUL11	9.24e-20	0.264519	0.528	0.387	2.36e-15	IFN.AMs	CUL1
TANK2	1.06e-19	0.309997	0.769	0.662	2.72e-15	IFN.AMs	TANK
CYLD1	1.27e-19	0.297686	0.633	0.49	3.23e-15	IFN.AMs	CYLD
VMP14	1.38e-19	0.424132	0.827	0.751	3.52e-15	IFN.AMs	VMP1
MCL1	1.39e-19	0.284501	0.95	0.891	3.55e-15	IFN.AMs	MCL1
FFAR4	1.78e-19	0.308158	0.843	0.761	4.54e-15	IFN.AMs	FFAR4
FCGR3A4	1.84e-19	0.300691	0.997	0.987	4.7e-15	IFN.AMs	FCGR3A
THEMIS2	1.91e-19	0.279802	0.888	0.789	4.87e-15	IFN.AMs	THEMIS2
RB11	2.29e-19	0.28106	0.626	0.485	5.84e-15	IFN.AMs	RB1
MSL3	2.29e-19	0.260557	0.727	0.6	5.84e-15	IFN.AMs	MSL3
FYTTD1	2.51e-19	0.320705	0.723	0.607	6.42e-15	IFN.AMs	FYTTD1
C3AR13	3.33e-19	0.383664	0.681	0.553	8.51e-15	IFN.AMs	C3AR1
PSME22	4.94e-19	0.315189	0.971	0.948	1.26e-14	IFN.AMs	PSME2
ADPRHL2	1.03e-18	0.281228	0.508	0.374	2.64e-14	IFN.AMs	ADPRHL2
CDC73	1.16e-18	0.286887	0.661	0.535	2.97e-14	IFN.AMs	CDC73
RAB8A1	1.26e-18	0.266218	0.882	0.817	3.21e-14	IFN.AMs	RAB8A
FPR22	1.29e-18	0.29207	0.476	0.328	3.29e-14	IFN.AMs	FPR2
SLFN11	1.37e-18	0.266622	0.871	0.771	3.49e-14	IFN.AMs	SLFN11
MGAT3	1.81e-18	0.263509	0.5	0.358	4.63e-14	IFN.AMs	MGAT3
CHD1	1.9e-18	0.27068	0.65	0.514	4.86e-14	IFN.AMs	CHD1
BACH13	2.66e-18	0.315095	0.834	0.759	6.78e-14	IFN.AMs	BACH1
OGFR	2.69e-18	0.28235	0.68	0.565	6.87e-14	IFN.AMs	OGFR
FKBP51	2.94e-18	0.307486	0.701	0.568	7.52e-14	IFN.AMs	FKBP5
STX112	2.97e-18	0.303103	0.852	0.778	7.6e-14	IFN.AMs	STX11
CHCHD7	3.27e-18	0.322532	0.652	0.543	8.34e-14	IFN.AMs	CHCHD7
CD553	3.37e-18	0.323391	0.859	0.783	8.6e-14	IFN.AMs	CD55
NR3C11	3.41e-18	0.26758	0.868	0.79	8.7e-14	IFN.AMs	NR3C1
EVL	6.7e-18	0.272564	0.929	0.85	1.71e-13	IFN.AMs	EVL
LPCAT21	1.13e-17	0.269735	0.759	0.646	2.89e-13	IFN.AMs	LPCAT2
PLAC82	1.44e-17	0.54483	0.776	0.661	3.68e-13	IFN.AMs	PLAC8
2022-03-13	2.26e-17	0.265724	0.868	0.782	5.77e-13	IFN.AMs	2022-03-01
GBP53	2.92e-17	0.294577	0.375	0.25	7.46e-13	IFN.AMs	GBP5
EREG1	3.41e-17	0.30095	0.259	0.151	8.71e-13	IFN.AMs	EREG
SMARCA51	4.43e-17	0.277934	0.849	0.788	1.13e-12	IFN.AMs	SMARCA5
GBP32	5.46e-17	0.274977	0.704	0.59	1.39e-12	IFN.AMs	GBP3
UBE2F	5.88e-17	0.264956	0.744	0.645	1.5e-12	IFN.AMs	UBE2F
RAB131	8.38e-17	0.35091	0.895	0.847	2.14e-12	IFN.AMs	RAB13
C5AR11	8.8e-17	0.271905	0.946	0.926	2.25e-12	IFN.AMs	C5AR1
APOL41	1.07e-16	0.274258	0.639	0.506	2.73e-12	IFN.AMs	APOL4
TRIM44	1.48e-16	0.267443	0.796	0.696	3.78e-12	IFN.AMs	TRIM44
FGD21	2.1e-16	0.297573	0.565	0.449	5.37e-12	IFN.AMs	FGD2
CSF2RB1	2.25e-16	0.276059	0.651	0.531	5.74e-12	IFN.AMs	CSF2RB
CCDC85B	3.41e-16	0.286822	0.769	0.681	8.71e-12	IFN.AMs	CCDC85B
UTRN	3.55e-16	0.273871	0.612	0.481	9.06e-12	IFN.AMs	UTRN
IRF91	3.77e-16	0.260757	0.755	0.646	9.64e-12	IFN.AMs	IRF9
CD472	3.86e-16	0.263403	0.964	0.92	9.87e-12	IFN.AMs	CD47
NASP1	7.88e-16	0.273746	0.591	0.48	2.01e-11	IFN.AMs	NASP
PTAFR1	7.9e-16	0.267904	0.704	0.595	2.02e-11	IFN.AMs	PTAFR
STK4	1.4e-15	0.250818	0.871	0.792	3.59e-11	IFN.AMs	STK4
EEA1	2.17e-15	0.270375	0.846	0.782	5.53e-11	IFN.AMs	EEA1
SIPA1L2	2.82e-15	0.254765	0.53	0.407	7.21e-11	IFN.AMs	SIPA1L2
NEAT12	3.72e-15	0.354673	0.963	0.947	9.5e-11	IFN.AMs	NEAT1
STK17B	4.37e-15	0.255416	0.72	0.61	1.12e-10	IFN.AMs	STK17B
SLC31A12	7.26e-15	0.263614	0.832	0.759	1.85e-10	IFN.AMs	SLC31A1
PARAL11	1.62e-14	0.259598	0.859	0.78	4.14e-10	IFN.AMs	PARAL1
RBBP6	2.09e-14	0.257327	0.583	0.472	5.34e-10	IFN.AMs	RBBP6
HBEGF	6.27e-14	0.28859	0.899	0.838	1.6e-09	IFN.AMs	HBEGF
GLDN	9.35e-14	0.277682	0.881	0.823	2.39e-09	IFN.AMs	GLDN
RABAC1	2.1e-13	0.302133	0.828	0.774	5.36e-09	IFN.AMs	RABAC1
FCGR2A	2.48e-13	0.278319	0.947	0.916	6.33e-09	IFN.AMs	FCGR2A
CFLAR2	3.08e-13	0.250403	0.765	0.673	7.86e-09	IFN.AMs	CFLAR
ARHGEF28	3.26e-13	0.277708	0.663	0.568	8.32e-09	IFN.AMs	ARHGEF28
CD402	4.19e-13	0.273382	0.622	0.51	1.07e-08	IFN.AMs	CD40
GK2	2.28e-12	0.250671	0.683	0.575	5.83e-08	IFN.AMs	GK
SLC2A3	2.72e-12	0.260798	0.64	0.529	6.96e-08	IFN.AMs	SLC2A3
AXL	7.22e-12	0.291879	0.789	0.718	1.84e-07	IFN.AMs	AXL
VCAN2	3.54e-11	0.379717	0.295	0.206	9.04e-07	IFN.AMs	VCAN
RETN	9.62e-11	0.308229	0.956	0.944	2.46e-06	IFN.AMs	RETN
CD163	3.68e-10	0.277099	0.867	0.818	9.4e-06	IFN.AMs	CD163
THBS1	2.23e-08	0.267893	0.838	0.779	0.000569536	IFN.AMs	THBS1
ID2	1.82e-07	0.29385	0.848	0.806	0.00463696	IFN.AMs	ID2
CSF12	2.49e-07	0.284129	0.343	0.264	0.00635348	IFN.AMs	CSF1
TGM21	1.83e-06	0.308684	0.867	0.827	0.0466637	IFN.AMs	TGM2
TUBA1A1	3.2e-06	0.262821	0.741	0.677	0.0816236	IFN.AMs	TUBA1A
PCLAF	0	1.00078	0.492	0.027	0	Cyc.AMs	PCLAF
MKI67	0	0.869292	0.353	0.007	0	Cyc.AMs	MKI67
TROAP	0	0.652066	0.339	0.01	0	Cyc.AMs	TROAP
BIRC5	0	0.584949	0.297	0.005	0	Cyc.AMs	BIRC5
AZU1	1.17e-219	0.866801	0.425	0.053	2.99e-215	Cyc.AMs	AZU1
PTTG1	4.12e-215	1.55309	0.686	0.156	1.05e-210	Cyc.AMs	PTTG1
GIHCG	2.56e-201	1.18885	0.614	0.124	6.55e-197	Cyc.AMs	GIHCG
LGALS12	6.99e-157	1.54996	1	0.999	1.79e-152	Cyc.AMs	LGALS1
GGH	2.38e-154	1.02224	0.594	0.142	6.08e-150	Cyc.AMs	GGH
VCAN3	2.99e-111	1.70152	0.622	0.205	7.65e-107	Cyc.AMs	VCAN
MZT2B	4.19e-108	1.19855	0.944	0.803	1.07e-103	Cyc.AMs	MZT2B
SNHG32	6.4e-108	1.25689	0.936	0.728	1.63e-103	Cyc.AMs	SNHG32
HMGN2	5.64e-104	1.45156	0.994	0.978	1.44e-99	Cyc.AMs	HMGN2
CENPF	4.66e-103	1.20246	0.433	0.106	1.19e-98	Cyc.AMs	CENPF
ANP32B	5.4e-101	1.16362	0.989	0.949	1.38e-96	Cyc.AMs	ANP32B
HNRNPA1	1.2e-98	0.953271	0.969	0.878	3.07e-94	Cyc.AMs	HNRNPA1
HIST1H1D	5.73e-95	0.689597	0.353	0.073	1.46e-90	Cyc.AMs	HIST1H1D
LYZ2	4.87e-91	0.973589	1	1	1.24e-86	Cyc.AMs	LYZ
IGFBP7	4.65e-89	0.508352	0.308	0.06	1.19e-84	Cyc.AMs	IGFBP7
ANXA1	1.16e-87	0.985267	1	0.998	2.95e-83	Cyc.AMs	ANXA1
MS4A6A	2.98e-87	1.14141	0.958	0.791	7.6e-83	Cyc.AMs	MS4A6A
SNHG6	7.27e-80	0.864686	0.972	0.906	1.86e-75	Cyc.AMs	SNHG6
PLP2	1.77e-77	1.09645	0.817	0.521	4.53e-73	Cyc.AMs	PLP2
VIM	8.44e-77	0.837116	1	1	2.16e-72	Cyc.AMs	VIM
H1FX	2.08e-75	1.18363	0.75	0.424	5.32e-71	Cyc.AMs	H1FX
TKT	5.82e-69	0.819374	1	0.981	1.49e-64	Cyc.AMs	TKT
LMNA	9.79e-68	0.924257	0.972	0.868	2.5e-63	Cyc.AMs	LMNA
NUP214	1.59e-67	0.873924	0.925	0.788	4.05e-63	Cyc.AMs	NUP214
HIST1H1C	3.63e-64	0.745924	0.503	0.188	9.28e-60	Cyc.AMs	HIST1H1C
PTMA1	2.04e-62	0.613347	1	1	5.22e-58	Cyc.AMs	PTMA
NUCB2	6.46e-60	1.07615	0.731	0.495	1.65e-55	Cyc.AMs	NUCB2
HSP90B1	3.1e-59	0.772878	1	0.989	7.91e-55	Cyc.AMs	HSP90B1
AGRP	6.37e-58	1.33933	0.85	0.662	1.63e-53	Cyc.AMs	AGRP
SAMHD11	1.19e-57	0.74276	1	0.973	3.04e-53	Cyc.AMs	SAMHD1
AHNAK	1.64e-57	0.823339	0.986	0.917	4.19e-53	Cyc.AMs	AHNAK
H3F3B3	1.89e-55	0.678766	1	0.997	4.82e-51	Cyc.AMs	H3F3B
PMP22	1.89e-54	0.777015	0.531	0.23	4.82e-50	Cyc.AMs	PMP22
BTG11	8.29e-54	0.738586	0.986	0.944	2.12e-49	Cyc.AMs	BTG1
H2AFV	1.38e-53	0.831982	0.933	0.853	3.51e-49	Cyc.AMs	H2AFV
AC020656.12	2.29e-52	0.752081	0.989	0.888	5.85e-48	Cyc.AMs	AC020656.1
CD99	3.32e-49	0.761031	0.906	0.754	8.49e-45	Cyc.AMs	CD99
PCBP2	2.61e-46	0.5274	0.992	0.966	6.66e-42	Cyc.AMs	PCBP2
MT-CYB	4.04e-46	0.595341	1	0.998	1.03e-41	Cyc.AMs	MT-CYB
RAC1	9.11e-46	0.467954	1	1	2.33e-41	Cyc.AMs	RAC1
LRRFIP1	7.66e-45	0.557709	0.997	0.991	1.96e-40	Cyc.AMs	LRRFIP1
NEAT13	1.01e-44	1.03632	1	0.947	2.57e-40	Cyc.AMs	NEAT1
NCAPD2	6.3e-43	0.483563	0.375	0.139	1.61e-38	Cyc.AMs	NCAPD2
SRSF31	9.78e-43	0.616782	0.933	0.844	2.5e-38	Cyc.AMs	SRSF3
MS4A14	1.02e-41	0.547068	0.375	0.142	2.61e-37	Cyc.AMs	MS4A14
HMGB3	1.04e-41	0.47284	0.319	0.107	2.65e-37	Cyc.AMs	HMGB3
EEF1D	2.39e-41	0.569201	0.986	0.966	6.11e-37	Cyc.AMs	EEF1D
MTRNR2L12	7.92e-41	0.587474	0.986	0.961	2.02e-36	Cyc.AMs	MTRNR2L12
ZFAS1	8.42e-41	0.664325	0.994	0.968	2.15e-36	Cyc.AMs	ZFAS1
EVI2B	2.99e-40	0.548754	0.986	0.971	7.63e-36	Cyc.AMs	EVI2B
RAB132	1.54e-39	0.62663	0.933	0.847	3.94e-35	Cyc.AMs	RAB13
MT-CO2	3.39e-39	0.44635	1	0.998	8.66e-35	Cyc.AMs	MT-CO2
CRNDE	4.21e-39	0.442919	0.261	0.08	1.07e-34	Cyc.AMs	CRNDE
VIM-AS1	6.78e-39	0.510971	0.386	0.155	1.73e-34	Cyc.AMs	VIM-AS1
FAM200B	1.02e-38	0.616786	0.85	0.722	2.62e-34	Cyc.AMs	FAM200B
MT-ND4	1.27e-37	0.518211	1	0.997	3.24e-33	Cyc.AMs	MT-ND4
MGST1	1.3e-37	0.661192	0.869	0.647	3.33e-33	Cyc.AMs	MGST1
ZFP36L2	1.78e-37	0.649777	0.961	0.912	4.54e-33	Cyc.AMs	ZFP36L2
HNRNPC2	5.47e-37	0.529063	0.975	0.937	1.4e-32	Cyc.AMs	HNRNPC
MCL11	7.93e-37	0.594374	0.967	0.891	2.03e-32	Cyc.AMs	MCL1
S100A10	8.53e-37	0.481286	1	1	2.18e-32	Cyc.AMs	S100A10
APLP2	3.97e-36	0.491087	1	0.995	1.01e-31	Cyc.AMs	APLP2
HSD17B11	5.25e-36	0.554858	0.947	0.878	1.34e-31	Cyc.AMs	HSD17B11
PABPC1	2.21e-35	0.423906	1	0.998	5.66e-31	Cyc.AMs	PABPC1
ZEB24	3.64e-35	0.659258	0.972	0.921	9.31e-31	Cyc.AMs	ZEB2
CCL233	3.84e-35	0.595911	0.708	0.459	9.81e-31	Cyc.AMs	CCL23
EMP31	1.49e-34	0.51226	0.992	0.965	3.8e-30	Cyc.AMs	EMP3
DDX171	3.89e-34	0.557221	0.939	0.854	9.93e-30	Cyc.AMs	DDX17
OSBPL11	4.8e-34	0.558557	0.992	0.923	1.22e-29	Cyc.AMs	OSBPL11
MT-ND5	9.05e-34	0.468808	1	0.993	2.31e-29	Cyc.AMs	MT-ND5
CSTA	1.01e-33	0.534051	1	0.979	2.58e-29	Cyc.AMs	CSTA
MYADM	1.78e-32	0.633757	0.931	0.815	4.54e-28	Cyc.AMs	MYADM
PECAM1	2.35e-32	0.517273	0.947	0.916	5.99e-28	Cyc.AMs	PECAM1
PARP142	3.56e-32	0.545973	0.939	0.84	9.08e-28	Cyc.AMs	PARP14
TAGLN2	3.89e-32	0.475188	1	0.993	9.94e-28	Cyc.AMs	TAGLN2
MT-ATP6	4.26e-32	0.505871	1	0.997	1.09e-27	Cyc.AMs	MT-ATP6
IFI163	1.82e-31	0.565514	0.944	0.863	4.65e-27	Cyc.AMs	IFI16
AKAP13	6.81e-31	0.531687	0.947	0.867	1.74e-26	Cyc.AMs	AKAP13
HMGB1	1.8e-30	0.583281	1	0.999	4.59e-26	Cyc.AMs	HMGB1
TAF1D	1.94e-30	0.590634	0.806	0.656	4.96e-26	Cyc.AMs	TAF1D
YBX31	2.35e-30	0.534663	0.936	0.853	6e-26	Cyc.AMs	YBX3
EIF3F	2.83e-30	0.507247	0.944	0.892	7.22e-26	Cyc.AMs	EIF3F
ATP5MC2	1.38e-29	0.395647	1	0.997	3.51e-25	Cyc.AMs	ATP5MC2
GRB2	1.49e-29	0.462646	0.997	0.982	3.8e-25	Cyc.AMs	GRB2
PTTG1IP	4.95e-29	0.545377	0.928	0.89	1.26e-24	Cyc.AMs	PTTG1IP
CAST1	1.3e-28	0.417773	1	0.993	3.31e-24	Cyc.AMs	CAST
HACD4	5e-28	0.514803	0.839	0.724	1.28e-23	Cyc.AMs	HACD4
IFITM32	9.23e-28	0.605685	0.833	0.674	2.36e-23	Cyc.AMs	IFITM3
CEP170	2e-27	0.521552	0.878	0.769	5.11e-23	Cyc.AMs	CEP170
SNHG5	2.32e-27	0.476971	0.942	0.873	5.93e-23	Cyc.AMs	SNHG5
AHR	4.07e-27	0.634146	0.714	0.584	1.04e-22	Cyc.AMs	AHR
[truncated: 3,731 more rows]
