# Supplementary material for: ScRNA-seq expression of IFI27 and APOC2 identifies four alveolar macrophage superclusters in healthy BALF
Source: Life Sci Alliance. 2022 Jul 12;5(11):e202201458. doi: 10.26508/lsa.202201458 (PMC9275597; doi:10.26508/lsa.202201458)
Supplement: Supplementary file 5 [file LSA-2022-01458_TableS5.xls]

## Sheet: Table S5_DEGs of monocyte and I
	p_val	avg_log2FC	pct.1	pct.2	p_val_adj	cluster	gene
MCEMP1	5.46e-308	0.589874	0.997	0.95	1.39e-303	Conv.Mono	MCEMP1
ALDH2	6.49e-299	0.553458	0.998	0.996	1.66e-294	Conv.Mono	ALDH2
CD52	4.54e-280	0.63135	0.999	0.988	1.16e-275	Conv.Mono	CD52
MARCO	2.23e-279	0.604265	1	0.996	5.69e-275	Conv.Mono	MARCO
PPARG	7.51e-266	0.536828	0.983	0.937	1.92e-261	Conv.Mono	PPARG
SVIL	1.32e-251	0.545753	0.957	0.867	3.36e-247	Conv.Mono	SVIL
UBB	2.85e-232	0.46796	1	0.999	7.29e-228	Conv.Mono	UBB
GLRX	5.4e-223	0.435739	0.999	0.996	1.38e-218	Conv.Mono	GLRX
VSIG4	4.88e-218	0.527147	0.989	0.964	1.25e-213	Conv.Mono	VSIG4
C1QA	1.38e-216	0.572015	1	0.993	3.53e-212	Conv.Mono	C1QA
INHBA	1.11e-204	0.791151	0.926	0.848	2.83e-200	Conv.Mono	INHBA
TCF7L2	7.67e-203	0.465243	0.949	0.87	1.96e-198	Conv.Mono	TCF7L2
FAM89A	4.52e-199	0.50697	0.921	0.835	1.15e-194	Conv.Mono	FAM89A
SERPINA1	2.85e-192	0.438034	0.998	0.989	7.28e-188	Conv.Mono	SERPINA1
ABHD5	6.99e-188	0.501329	0.929	0.867	1.79e-183	Conv.Mono	ABHD5
RETN	1.99e-185	0.568418	0.973	0.921	5.08e-181	Conv.Mono	RETN
LTA4H	4.64e-185	0.424679	0.999	0.994	1.19e-180	Conv.Mono	LTA4H
AQP3	6.63e-181	0.541472	0.887	0.766	1.69e-176	Conv.Mono	AQP3
FABP4	7.24e-179	0.723133	0.994	0.979	1.85e-174	Conv.Mono	FABP4
ALOX5AP	2.03e-177	0.423116	0.999	0.981	5.19e-173	Conv.Mono	ALOX5AP
MGST3	8.77e-163	0.341393	1	1	2.24e-158	Conv.Mono	MGST3
FBP1	1.36e-158	0.472119	1	0.997	3.48e-154	Conv.Mono	FBP1
GLIPR2	6.15e-156	0.376719	0.997	0.987	1.57e-151	Conv.Mono	GLIPR2
PHLDA3	1.59e-155	0.466987	0.844	0.742	4.07e-151	Conv.Mono	PHLDA3
MS4A7	1.18e-154	0.297131	1	0.999	3.03e-150	Conv.Mono	MS4A7
TKT	6.85e-149	0.360759	0.991	0.986	1.75e-144	Conv.Mono	TKT
TSPO	9.23e-149	0.306862	1	1	2.36e-144	Conv.Mono	TSPO
CXCL16	4.08e-147	0.347209	0.997	0.995	1.04e-142	Conv.Mono	CXCL16
SPN	3.29e-146	0.41542	0.957	0.905	8.41e-142	Conv.Mono	SPN
GYPC	1.14e-145	0.398586	0.967	0.932	2.91e-141	Conv.Mono	GYPC
HCAR2	4.35e-142	0.454809	0.467	0.241	1.11e-137	Conv.Mono	HCAR2
THBS1	5.46e-134	0.55239	0.829	0.725	1.4e-129	Conv.Mono	THBS1
APOC1	3.97e-133	0.266552	1	1	1.02e-128	Conv.Mono	APOC1
HLA-C	7.79e-129	0.293445	1	1	1.99e-124	Conv.Mono	HLA-C
GCHFR	2.46e-127	0.381895	0.996	0.989	6.28e-123	Conv.Mono	GCHFR
LY6E	1.78e-123	0.364386	0.988	0.963	4.54e-119	Conv.Mono	LY6E
PLAC8	2.35e-122	0.488852	0.727	0.538	6e-118	Conv.Mono	PLAC8
GRN	4.7e-115	0.259634	1	1	1.2e-110	Conv.Mono	GRN
ALOX5	7.42e-115	0.304438	0.988	0.968	1.9e-110	Conv.Mono	ALOX5
TBC1D10C	3.57e-113	0.374752	0.529	0.317	9.11e-109	Conv.Mono	TBC1D10C
AGRP	7.08e-112	0.526526	0.75	0.629	1.81e-107	Conv.Mono	AGRP
SEPTIN11	4.48e-111	0.336003	0.968	0.949	1.14e-106	Conv.Mono	SEPTIN11
ATP1B1	3.04e-109	0.356613	0.943	0.906	7.76e-105	Conv.Mono	ATP1B1
AC026369.3	3.03e-106	0.481145	0.881	0.823	7.74e-102	Conv.Mono	AC026369.3
TREM1	3.11e-101	0.303088	0.983	0.953	7.94e-97	Conv.Mono	TREM1
PLAAT3	1.92e-100	0.327521	0.942	0.89	4.9e-96	Conv.Mono	PLAAT3
CARD16	1.73e-96	0.297592	0.956	0.931	4.43e-92	Conv.Mono	CARD16
LPL	2.56e-96	0.409579	0.92	0.865	6.53e-92	Conv.Mono	LPL
APIP	1.52e-94	0.318728	0.939	0.914	3.89e-90	Conv.Mono	APIP
PDLIM1	3.8e-93	0.351244	0.905	0.848	9.7e-89	Conv.Mono	PDLIM1
GPA33	1.75e-92	0.316434	0.336	0.17	4.46e-88	Conv.Mono	GPA33
ARHGEF28	1.15e-89	0.355298	0.495	0.329	2.94e-85	Conv.Mono	ARHGEF28
RGCC	1.19e-89	0.281405	0.992	0.961	3.03e-85	Conv.Mono	RGCC
AL365361.1	1.41e-89	0.333073	0.485	0.298	3.61e-85	Conv.Mono	AL365361.1
PYCARD	4.49e-89	0.267847	0.994	0.989	1.15e-84	Conv.Mono	PYCARD
LRPAP1	5.56e-88	0.274335	0.99	0.987	1.42e-83	Conv.Mono	LRPAP1
HDDC2	6.74e-88	0.310991	0.897	0.86	1.72e-83	Conv.Mono	HDDC2
EVL	1.56e-87	0.346301	0.867	0.805	3.99e-83	Conv.Mono	EVL
AMIGO2	7.21e-87	0.350676	0.78	0.696	1.84e-82	Conv.Mono	AMIGO2
CDC42EP3	3.12e-86	0.353838	0.824	0.748	7.98e-82	Conv.Mono	CDC42EP3
VCAN	8.77e-85	0.276176	0.942	0.716	2.24e-80	Conv.Mono	VCAN
PNPLA6	1.54e-82	0.283737	0.907	0.849	3.93e-78	Conv.Mono	PNPLA6
LGALS3BP	9.52e-82	0.320179	0.936	0.909	2.43e-77	Conv.Mono	LGALS3BP
S100A8	1.26e-81	0.32206	0.992	0.972	3.22e-77	Conv.Mono	S100A8
S100A13	1.45e-81	0.331743	0.886	0.834	3.7e-77	Conv.Mono	S100A13
DECR1	1.61e-80	0.305533	0.955	0.938	4.12e-76	Conv.Mono	DECR1
STXBP2	1.79e-80	0.355354	0.949	0.926	4.56e-76	Conv.Mono	STXBP2
POR	4.01e-80	0.300537	0.815	0.714	1.03e-75	Conv.Mono	POR
FFAR4	1.38e-78	0.320397	0.757	0.65	3.52e-74	Conv.Mono	FFAR4
S1PR4	9.92e-78	0.304381	0.61	0.43	2.53e-73	Conv.Mono	S1PR4
JAML	1.21e-76	0.292144	0.865	0.799	3.08e-72	Conv.Mono	JAML
ARL4A	3.3e-76	0.362792	0.859	0.806	8.43e-72	Conv.Mono	ARL4A
RASGRP2	2.36e-74	0.304234	0.596	0.421	6.04e-70	Conv.Mono	RASGRP2
MME	5.34e-73	0.470311	0.802	0.758	1.36e-68	Conv.Mono	MME
AKAP5	8.36e-72	0.25705	0.295	0.154	2.14e-67	Conv.Mono	AKAP5
CES1	3.09e-71	0.463468	0.829	0.762	7.9e-67	Conv.Mono	CES1
CYSLTR1	3.63e-71	0.284571	0.573	0.399	9.26e-67	Conv.Mono	CYSLTR1
PARAL1	4.63e-71	0.318891	0.764	0.681	1.18e-66	Conv.Mono	PARAL1
TLCD2	7.66e-71	0.287339	0.368	0.215	1.96e-66	Conv.Mono	TLCD2
GCA	5.33e-69	0.255712	0.972	0.948	1.36e-64	Conv.Mono	GCA
MGST1	1.29e-68	0.310213	0.791	0.723	3.29e-64	Conv.Mono	MGST1
SH3BP5	2.05e-66	0.287518	0.803	0.716	5.22e-62	Conv.Mono	SH3BP5
S100P	3.63e-66	0.407315	0.286	0.153	9.27e-62	Conv.Mono	S100P
FHL1	1.03e-62	0.335559	0.596	0.495	2.62e-58	Conv.Mono	FHL1
RAB13	1.65e-61	0.283366	0.95	0.939	4.21e-57	Conv.Mono	RAB13
FOLR3	2.7e-61	0.451137	0.653	0.558	6.9e-57	Conv.Mono	FOLR3
C1QB	1.45e-59	0.33455	0.999	0.995	3.71e-55	Conv.Mono	C1QB
CCND3	1.53e-58	0.279196	0.708	0.605	3.9e-54	Conv.Mono	CCND3
ACKR3	1.84e-56	0.310545	0.406	0.27	4.7e-52	Conv.Mono	ACKR3
ABCG1	1.72e-54	0.305899	0.863	0.84	4.39e-50	Conv.Mono	ABCG1
TMEM173	1.92e-54	0.254778	0.67	0.548	4.9e-50	Conv.Mono	TMEM173
OSCAR	3.04e-54	0.258785	0.866	0.804	7.77e-50	Conv.Mono	OSCAR
RARA	9.37e-54	0.257051	0.69	0.58	2.39e-49	Conv.Mono	RARA
GLDN	2.08e-52	0.277363	0.782	0.723	5.31e-48	Conv.Mono	GLDN
ACVRL1	4.85e-52	0.250463	0.507	0.374	1.24e-47	Conv.Mono	ACVRL1
LIMA1	9.38e-52	0.285959	0.784	0.736	2.39e-47	Conv.Mono	LIMA1
C1QC	2.62e-50	0.278949	0.999	0.992	6.68e-46	Conv.Mono	C1QC
STAC	7.89e-50	0.251153	0.666	0.543	2.01e-45	Conv.Mono	STAC
COLEC12	1.53e-46	0.256589	0.821	0.76	3.91e-42	Conv.Mono	COLEC12
SGMS2	2.88e-45	0.254536	0.829	0.772	7.37e-41	Conv.Mono	SGMS2
GPATCH11	5.46e-42	0.251512	0.641	0.537	1.39e-37	Conv.Mono	GPATCH11
ALAS1	7.22e-41	0.251291	0.85	0.841	1.85e-36	Conv.Mono	ALAS1
VMO1	2.23e-37	0.323764	0.69	0.634	5.71e-33	Conv.Mono	VMO1
HLA-DRB5	1.47e-23	0.279286	0.929	0.89	3.75e-19	Conv.Mono	HLA-DRB5
CLEC10A	6.89e-176	0.856276	0.455	0.123	1.76e-171	Int.Mono	CLEC10A
CCR2	7.57e-122	0.598244	0.341	0.093	1.93e-117	Int.Mono	CCR2
EMP1	9.45e-117	1.04466	0.744	0.442	2.41e-112	Int.Mono	EMP1
FPR3	4.54e-99	0.649394	0.918	0.702	1.16e-94	Int.Mono	FPR3
ALCAM	6.72e-89	0.699069	0.964	0.899	1.72e-84	Int.Mono	ALCAM
CORO1A	1.52e-82	0.641611	0.657	0.394	3.87e-78	Int.Mono	CORO1A
EMP3	1.02e-81	0.648702	0.998	0.994	2.61e-77	Int.Mono	EMP3
FGL2	3.84e-81	0.668336	0.732	0.486	9.8e-77	Int.Mono	FGL2
YWHAH	4.05e-81	0.616662	0.999	0.996	1.03e-76	Int.Mono	YWHAH
CLEC5A	8.76e-77	0.832815	0.719	0.485	2.24e-72	Int.Mono	CLEC5A
LGALS1	1.76e-76	0.541312	1	1	4.49e-72	Int.Mono	LGALS1
CSF1R	1.06e-75	0.619883	0.791	0.609	2.7e-71	Int.Mono	CSF1R
FCGR2B	6.61e-75	0.701412	0.567	0.298	1.69e-70	Int.Mono	FCGR2B
S100A10	8.42e-75	0.528075	1	1	2.15e-70	Int.Mono	S100A10
GPR183	9.6e-69	0.497332	0.404	0.173	2.45e-64	Int.Mono	GPR183
KCTD12	6.63e-64	0.432276	0.98	0.954	1.69e-59	Int.Mono	KCTD12
LIMD2	5.98e-62	0.420392	0.366	0.159	1.53e-57	Int.Mono	LIMD2
AHNAK	1.04e-58	0.483808	0.996	0.984	2.66e-54	Int.Mono	AHNAK
CAMK1	1.48e-57	0.602054	0.348	0.162	3.79e-53	Int.Mono	CAMK1
MS4A6A	4.07e-57	0.489781	0.98	0.935	1.04e-52	Int.Mono	MS4A6A
TGFBI	7.7e-55	0.50687	0.952	0.909	1.97e-50	Int.Mono	TGFBI
ENO1	3.66e-53	0.382922	0.984	0.973	9.34e-49	Int.Mono	ENO1
LMNA	7.82e-53	0.672485	0.967	0.947	2e-48	Int.Mono	LMNA
SH3BGRL3	7.88e-52	0.298118	1	1	2.01e-47	Int.Mono	SH3BGRL3
METRNL	2.63e-51	0.507278	0.847	0.746	6.72e-47	Int.Mono	METRNL
PLXDC2	1.54e-50	0.357975	0.999	0.994	3.95e-46	Int.Mono	PLXDC2
PLXNC1	3.62e-50	0.362811	0.413	0.204	9.24e-46	Int.Mono	PLXNC1
MAFB	1.66e-49	0.562479	0.831	0.676	4.24e-45	Int.Mono	MAFB
KLF6	3.39e-49	0.516272	0.96	0.906	8.65e-45	Int.Mono	KLF6
TPM3	8.76e-49	0.319639	1	1	2.24e-44	Int.Mono	TPM3
KCNN4	3.15e-48	0.30776	0.278	0.117	8.04e-44	Int.Mono	KCNN4
LIMS1	2.05e-47	0.443859	0.958	0.917	5.24e-43	Int.Mono	LIMS1
RBPJ	2.29e-47	0.438585	0.991	0.985	5.85e-43	Int.Mono	RBPJ
TREM2	3.54e-47	0.464335	0.925	0.815	9.05e-43	Int.Mono	TREM2
HSP90AB1	5.02e-47	0.374567	1	0.999	1.28e-42	Int.Mono	HSP90AB1
CCL2	6.16e-46	0.854798	0.444	0.241	1.57e-41	Int.Mono	CCL2
TGFBR1	8.42e-45	0.484448	0.731	0.587	2.15e-40	Int.Mono	TGFBR1
ANTXR2	2.11e-44	0.368003	0.41	0.221	5.39e-40	Int.Mono	ANTXR2
PRKCB	3.8e-44	0.446881	0.471	0.285	9.7e-40	Int.Mono	PRKCB
PLP2	4.5e-44	0.479891	0.766	0.636	1.15e-39	Int.Mono	PLP2
DNMT1	8e-44	0.520745	0.754	0.647	2.04e-39	Int.Mono	DNMT1
GAPDH	8.16e-44	0.359911	0.998	0.994	2.08e-39	Int.Mono	GAPDH
PEA15	4.43e-43	0.420637	0.639	0.461	1.13e-38	Int.Mono	PEA15
SPRED1	1.52e-42	0.567627	0.808	0.7	3.87e-38	Int.Mono	SPRED1
CD84	2e-42	0.412772	0.699	0.519	5.1e-38	Int.Mono	CD84
EMB	4.4e-42	0.37928	0.531	0.333	1.12e-37	Int.Mono	EMB
MALAT1	1.02e-41	0.390561	1	0.999	2.61e-37	Int.Mono	MALAT1
UBC	2.87e-40	0.349774	0.99	0.981	7.33e-36	Int.Mono	UBC
ZFP36L1	3.94e-40	0.402404	0.925	0.834	1.01e-35	Int.Mono	ZFP36L1
LHFPL2	1.4e-39	0.46761	0.739	0.589	3.58e-35	Int.Mono	LHFPL2
TYMP	1.35e-38	0.329413	0.988	0.977	3.46e-34	Int.Mono	TYMP
CCND2	3.54e-38	0.385064	0.303	0.153	9.04e-34	Int.Mono	CCND2
AP1S2	4.07e-38	0.394405	0.799	0.706	1.04e-33	Int.Mono	AP1S2
AHR	9.57e-38	0.387033	0.858	0.761	2.44e-33	Int.Mono	AHR
MTHFD2	1.02e-37	0.457469	0.713	0.584	2.61e-33	Int.Mono	MTHFD2
SGK1	1.21e-37	0.494919	0.772	0.612	3.09e-33	Int.Mono	SGK1
MIF	1.52e-37	0.372576	0.995	0.985	3.89e-33	Int.Mono	MIF
YWHAZ	5.95e-37	0.298273	0.998	0.997	1.52e-32	Int.Mono	YWHAZ
RGS10	1.01e-36	0.330094	0.959	0.903	2.57e-32	Int.Mono	RGS10
MYADM	4.49e-36	0.50381	0.946	0.926	1.15e-31	Int.Mono	MYADM
MT-ATP6	1.07e-35	0.317205	1	1	2.72e-31	Int.Mono	MT-ATP6
CD99	1.99e-35	0.331863	0.955	0.924	5.08e-31	Int.Mono	CD99
TUBA1A	2.66e-35	0.466792	0.863	0.777	6.79e-31	Int.Mono	TUBA1A
PTGES3	3.29e-35	0.292176	0.992	0.986	8.41e-31	Int.Mono	PTGES3
KLF2	3.96e-35	0.661988	0.667	0.551	1.01e-30	Int.Mono	KLF2
GNB4	5.06e-35	0.350949	0.913	0.827	1.29e-30	Int.Mono	GNB4
AC020916.1	7.57e-35	0.404343	0.485	0.318	1.93e-30	Int.Mono	AC020916.1
PLEKHO1	1.05e-33	0.391166	0.663	0.514	2.67e-29	Int.Mono	PLEKHO1
CALM1	3.8e-33	0.319408	1	1	9.69e-29	Int.Mono	CALM1
ITGAM	8.74e-33	0.408879	0.787	0.698	2.23e-28	Int.Mono	ITGAM
EZR	2.26e-32	0.499206	0.842	0.762	5.77e-28	Int.Mono	EZR
MTDH	3.11e-32	0.262083	0.998	0.995	7.94e-28	Int.Mono	MTDH
LSP1	4.59e-32	0.316744	0.921	0.812	1.17e-27	Int.Mono	LSP1
MAP3K2	1.38e-31	0.358601	0.887	0.808	3.51e-27	Int.Mono	MAP3K2
CCR1	8.75e-31	0.421929	0.793	0.704	2.24e-26	Int.Mono	CCR1
PPP1R14B	1.17e-30	0.380265	0.876	0.81	2.98e-26	Int.Mono	PPP1R14B
PMP22	1.33e-30	0.424863	0.74	0.628	3.4e-26	Int.Mono	PMP22
MARCKS	2.64e-30	0.279313	0.553	0.353	6.75e-26	Int.Mono	MARCKS
ARF6	3.03e-30	0.330706	0.938	0.903	7.74e-26	Int.Mono	ARF6
SEPTIN7	8.94e-30	0.271091	0.993	0.981	2.28e-25	Int.Mono	SEPTIN7
QPCT	1.1e-29	0.388245	0.46	0.309	2.8e-25	Int.Mono	QPCT
SNCA	1.86e-29	0.322034	0.44	0.29	4.76e-25	Int.Mono	SNCA
SLC8A1	2.71e-29	0.324708	0.918	0.863	6.93e-25	Int.Mono	SLC8A1
TUBB	3.07e-29	0.274611	0.989	0.967	7.85e-25	Int.Mono	TUBB
CKLF	3.98e-28	0.39474	0.981	0.965	1.02e-23	Int.Mono	CKLF
KRAS	5.28e-28	0.321074	0.859	0.791	1.35e-23	Int.Mono	KRAS
CREB5	8.55e-28	0.325863	0.481	0.329	2.18e-23	Int.Mono	CREB5
DPYSL2	1.09e-27	0.316474	0.953	0.916	2.78e-23	Int.Mono	DPYSL2
ZEB2	2.22e-27	0.313069	0.996	0.984	5.67e-23	Int.Mono	ZEB2
SORL1	2.77e-27	0.344123	0.651	0.523	7.08e-23	Int.Mono	SORL1
MEF2C	6.81e-27	0.313774	0.5	0.352	1.74e-22	Int.Mono	MEF2C
CPM	2.16e-26	0.327139	0.923	0.856	5.52e-22	Int.Mono	CPM
ADGRE5	3.67e-26	0.372449	0.917	0.878	9.37e-22	Int.Mono	ADGRE5
NIBAN2	6.62e-26	0.304243	0.402	0.261	1.69e-21	Int.Mono	NIBAN2
RASSF2	6.66e-26	0.330202	0.397	0.256	1.7e-21	Int.Mono	RASSF2
PTPRE	1.1e-25	0.405762	0.595	0.463	2.82e-21	Int.Mono	PTPRE
MEF2A	1.58e-25	0.294337	0.845	0.767	4.04e-21	Int.Mono	MEF2A
SLC39A10	2.11e-25	0.328406	0.878	0.823	5.38e-21	Int.Mono	SLC39A10
SET	2.47e-25	0.25072	0.99	0.984	6.31e-21	Int.Mono	SET
KDM7A	2.66e-25	0.288563	0.337	0.205	6.79e-21	Int.Mono	KDM7A
IQGAP1	3.56e-25	0.254154	0.998	0.993	9.09e-21	Int.Mono	IQGAP1
HSPA8	9.86e-25	0.297474	0.998	0.994	2.52e-20	Int.Mono	HSPA8
TAGLN2	1.15e-24	0.273311	0.998	0.999	2.93e-20	Int.Mono	TAGLN2
CCR5	1.72e-24	0.281088	0.307	0.182	4.4e-20	Int.Mono	CCR5
A2M	1.91e-24	0.352664	0.393	0.248	4.89e-20	Int.Mono	A2M
ANPEP	1.91e-23	0.346372	0.698	0.606	4.89e-19	Int.Mono	ANPEP
ANXA1	2.23e-23	0.293246	0.999	0.999	5.69e-19	Int.Mono	ANXA1
VCAN1	2.72e-23	0.476572	0.852	0.824	6.96e-19	Int.Mono	VCAN
VIM	4.2e-23	0.268604	1	1	1.07e-18	Int.Mono	VIM
HCST	4.29e-23	0.332972	0.989	0.959	1.1e-18	Int.Mono	HCST
RPS6KA3	5.2e-23	0.381319	0.748	0.684	1.33e-18	Int.Mono	RPS6KA3
CAPN2	7.99e-23	0.318375	0.747	0.652	2.04e-18	Int.Mono	CAPN2
LILRB3	1.42e-22	0.302302	0.726	0.647	3.62e-18	Int.Mono	LILRB3
ELK3	1.44e-22	0.296055	0.41	0.282	3.67e-18	Int.Mono	ELK3
PFKP	3.65e-22	0.393685	0.371	0.256	9.31e-18	Int.Mono	PFKP
MBNL1	6.28e-22	0.25409	0.995	0.978	1.6e-17	Int.Mono	MBNL1
ZFP36L2	7.71e-22	0.284703	0.979	0.964	1.97e-17	Int.Mono	ZFP36L2
POU2F2	8.26e-22	0.300311	0.263	0.152	2.11e-17	Int.Mono	POU2F2
RHOC	1.91e-21	0.356425	0.471	0.363	4.89e-17	Int.Mono	RHOC
ZFP36	1.03e-20	0.337694	0.884	0.828	2.63e-16	Int.Mono	ZFP36
PAK1	1.71e-20	0.30809	0.566	0.457	4.37e-16	Int.Mono	PAK1
LPCAT2	1.72e-20	0.346499	0.746	0.691	4.4e-16	Int.Mono	LPCAT2
RALA	2.07e-20	0.254018	0.742	0.642	5.29e-16	Int.Mono	RALA
DIAPH1	3.18e-20	0.301892	0.915	0.881	8.12e-16	Int.Mono	DIAPH1
LILRB2	4.09e-20	0.322953	0.449	0.331	1.05e-15	Int.Mono	LILRB2
HM13	7.17e-20	0.325209	0.668	0.568	1.83e-15	Int.Mono	HM13
CALHM6	1.68e-19	0.267837	0.494	0.38	4.29e-15	Int.Mono	CALHM6
PLEC	1.68e-19	0.298375	0.85	0.797	4.3e-15	Int.Mono	PLEC
FN1	1.77e-19	0.510102	0.982	0.952	4.52e-15	Int.Mono	FN1
OSBPL8	2.27e-19	0.286059	0.941	0.891	5.79e-15	Int.Mono	OSBPL8
SH3KBP1	2.99e-19	0.296889	0.564	0.458	7.64e-15	Int.Mono	SH3KBP1
RAPH1	2.58e-18	0.301393	0.3	0.197	6.58e-14	Int.Mono	RAPH1
SERINC5	3.22e-18	0.284557	0.514	0.406	8.22e-14	Int.Mono	SERINC5
PRMT2	3.62e-18	0.26179	0.773	0.699	9.24e-14	Int.Mono	PRMT2
DOCK10	1.57e-17	0.317261	0.654	0.585	4.01e-13	Int.Mono	DOCK10
IER3	2.02e-17	0.275807	0.564	0.446	5.15e-13	Int.Mono	IER3
MTRNR2L12	4.36e-17	0.27155	0.998	0.989	1.11e-12	Int.Mono	MTRNR2L12
MMP14	1.07e-16	0.259278	0.421	0.31	2.73e-12	Int.Mono	MMP14
MOB3B	1.2e-16	0.275728	0.795	0.73	3.07e-12	Int.Mono	MOB3B
CRIP1	2.53e-16	0.301685	1	0.998	6.47e-12	Int.Mono	CRIP1
RPL22L1	2.69e-16	0.310872	0.772	0.717	6.88e-12	Int.Mono	RPL22L1
DAAM1	4.53e-16	0.291885	0.39	0.288	1.16e-11	Int.Mono	DAAM1
RAP2B	4.96e-16	0.262971	0.783	0.742	1.27e-11	Int.Mono	RAP2B
RAP2A	5.11e-16	0.27608	0.555	0.468	1.31e-11	Int.Mono	RAP2A
CARD19	8.28e-16	0.26184	0.419	0.319	2.11e-11	Int.Mono	CARD19
DPYD	1.21e-15	0.270911	0.674	0.609	3.09e-11	Int.Mono	DPYD
ITPRIPL2	1.46e-15	0.253902	0.696	0.621	3.73e-11	Int.Mono	ITPRIPL2
NIBAN1	1.76e-15	0.257968	0.864	0.814	4.5e-11	Int.Mono	NIBAN1
BCAT1	5.47e-15	0.285702	0.507	0.407	1.4e-10	Int.Mono	BCAT1
NME1	6.32e-15	0.290278	0.695	0.642	1.61e-10	Int.Mono	NME1
DUSP6	1.4e-14	0.384978	0.623	0.55	3.58e-10	Int.Mono	DUSP6
ARL4C	1.52e-14	0.328747	0.514	0.404	3.87e-10	Int.Mono	ARL4C
ANKRD28	2.21e-14	0.31578	0.539	0.457	5.65e-10	Int.Mono	ANKRD28
CCDC112	3.42e-14	0.268946	0.513	0.43	8.73e-10	Int.Mono	CCDC112
HIST1H4C	5.25e-14	0.255028	0.685	0.612	1.34e-09	Int.Mono	HIST1H4C
UBE2Q2	7.46e-14	0.250764	0.596	0.524	1.91e-09	Int.Mono	UBE2Q2
TSC22D3	7.67e-14	0.303907	0.758	0.707	1.96e-09	Int.Mono	TSC22D3
IL3RA	4.39e-13	0.323141	0.618	0.537	1.12e-08	Int.Mono	IL3RA
TRPS1	3.81e-12	0.258921	0.53	0.455	9.74e-08	Int.Mono	TRPS1
ATF4	4.49e-12	0.252908	0.702	0.645	1.15e-07	Int.Mono	ATF4
TLR2	1.56e-11	0.2621	0.426	0.349	3.99e-07	Int.Mono	TLR2
GAS7	2e-11	0.257835	0.377	0.296	5.12e-07	Int.Mono	GAS7
PHLDA1	1.13e-10	0.331099	0.294	0.217	2.88e-06	Int.Mono	PHLDA1
NEAT1	2.69e-10	0.252866	0.999	0.993	6.88e-06	Int.Mono	NEAT1
BASP1	1e-08	0.2801	0.381	0.303	0.000255402	Int.Mono	BASP1
FILIP1L	2.19e-06	0.278389	0.448	0.415	0.0558222	Int.Mono	FILIP1L
MTRNR2L1	2.07e-05	0.274635	0.696	0.697	0.527873	Int.Mono	MTRNR2L1
PLAC81	1.25e-220	1.72652	0.922	0.606	3.19e-216	FCN1.Mono	PLAC8
FCN1	8.55e-194	1.45785	0.778	0.331	2.18e-189	FCN1.Mono	FCN1
THBS11	1.88e-144	1.266	0.95	0.761	4.81e-140	FCN1.Mono	THBS1
RETN1	4.85e-129	1.13208	0.992	0.943	1.24e-124	FCN1.Mono	RETN
MNDA	1.29e-101	0.554709	1	0.996	3.29e-97	FCN1.Mono	MNDA
S100A81	3.22e-81	0.717105	1	0.981	8.23e-77	FCN1.Mono	S100A8
AC020656.1	4.12e-80	0.94632	0.974	0.908	1.05e-75	FCN1.Mono	AC020656.1
S100A9	3.2e-79	0.613302	1	0.998	8.17e-75	FCN1.Mono	S100A9
LYZ	1.02e-73	0.74917	1	1	2.61e-69	FCN1.Mono	LYZ
VSIG41	3.63e-67	0.559974	0.989	0.976	9.28e-63	FCN1.Mono	VSIG4
TKT1	4.44e-66	0.483745	0.994	0.988	1.13e-61	FCN1.Mono	TKT
VCAN2	7.76e-66	0.711335	0.962	0.815	1.98e-61	FCN1.Mono	VCAN
ALOX5AP1	8.3e-56	0.449929	1	0.989	2.12e-51	FCN1.Mono	ALOX5AP
GCA1	2.54e-49	0.486837	0.968	0.959	6.48e-45	FCN1.Mono	GCA
AC037198.1	3.32e-46	0.427224	0.307	0.132	8.48e-42	FCN1.Mono	AC037198.1
FPR2	1.32e-45	0.573827	0.492	0.29	3.38e-41	FCN1.Mono	FPR2
HMGN2	1.09e-41	0.366019	0.992	0.988	2.77e-37	FCN1.Mono	HMGN2
SLC24A4	1.78e-41	0.376279	0.346	0.168	4.55e-37	FCN1.Mono	SLC24A4
CLEC12A	1.39e-39	0.375055	0.961	0.858	3.55e-35	FCN1.Mono	CLEC12A
MYB	6.01e-38	0.40732	0.304	0.144	1.54e-33	FCN1.Mono	MYB
SRGN	1.13e-36	0.432238	1	1	2.89e-32	FCN1.Mono	SRGN
AGRP1	8.24e-36	0.752302	0.767	0.682	2.1e-31	FCN1.Mono	AGRP
SVIL1	3.72e-35	0.348146	0.964	0.907	9.51e-31	FCN1.Mono	SVIL
SMIM25	6.72e-35	0.383599	0.998	0.993	1.72e-30	FCN1.Mono	SMIM25
HLA-B	1.94e-32	0.271827	1	1	4.95e-28	FCN1.Mono	HLA-B
OLR1	1.97e-32	0.305275	1	0.988	5.02e-28	FCN1.Mono	OLR1
MS4A71	7.66e-32	0.25817	1	0.999	1.96e-27	FCN1.Mono	MS4A7
HLA-C1	3.94e-31	0.258786	1	1	1.01e-26	FCN1.Mono	HLA-C
ARL4A1	1.08e-30	0.49846	0.891	0.827	2.76e-26	FCN1.Mono	ARL4A
AL034397.3	3.69e-29	0.393193	0.364	0.209	9.43e-25	FCN1.Mono	AL034397.3
TMEM1731	2.26e-28	0.412658	0.705	0.6	5.76e-24	FCN1.Mono	TMEM173
PCED1B-AS1	6.67e-28	0.349984	0.871	0.819	1.7e-23	FCN1.Mono	PCED1B-AS1
CXCL161	3.43e-27	0.29368	0.999	0.996	8.76e-23	FCN1.Mono	CXCL16
TNFSF10	3.97e-27	0.434598	0.749	0.627	1.01e-22	FCN1.Mono	TNFSF10
FOS	6e-27	0.538541	0.99	0.969	1.53e-22	FCN1.Mono	FOS
TCF7L21	1.11e-26	0.29816	0.963	0.904	2.83e-22	FCN1.Mono	TCF7L2
HP	3.79e-26	0.772988	0.446	0.321	9.68e-22	FCN1.Mono	HP
CD302	8.41e-26	0.298051	0.992	0.964	2.15e-21	FCN1.Mono	CD302
MCEMP11	1.07e-25	0.300202	1	0.971	2.74e-21	FCN1.Mono	MCEMP1
LYST	7.37e-25	0.405101	0.788	0.719	1.88e-20	FCN1.Mono	LYST
FAM107B	2.41e-24	0.315141	0.933	0.892	6.15e-20	FCN1.Mono	FAM107B
CARD161	3.39e-24	0.28976	0.962	0.941	8.65e-20	FCN1.Mono	CARD16
MARCO1	6.3e-24	0.27705	1	0.998	1.61e-19	FCN1.Mono	MARCO
EREG	6.43e-24	0.549492	0.444	0.295	1.64e-19	FCN1.Mono	EREG
APLP2	6.87e-24	0.252061	1	0.999	1.75e-19	FCN1.Mono	APLP2
S100P1	8.36e-24	0.447616	0.349	0.207	2.14e-19	FCN1.Mono	S100P
GAPT	4.04e-23	0.345155	0.441	0.289	1.03e-18	FCN1.Mono	GAPT
BTG1	9.68e-23	0.292062	0.993	0.98	2.47e-18	FCN1.Mono	BTG1
H2AFV	2.85e-22	0.362361	0.917	0.906	7.27e-18	FCN1.Mono	H2AFV
LRPAP11	1.23e-21	0.283278	0.994	0.988	3.15e-17	FCN1.Mono	LRPAP1
ABHD51	4.15e-21	0.326605	0.916	0.895	1.06e-16	FCN1.Mono	ABHD5
HSD17B11	4.52e-21	0.282535	0.896	0.849	1.15e-16	FCN1.Mono	HSD17B11
PPARG1	7.72e-21	0.261801	0.976	0.958	1.97e-16	FCN1.Mono	PPARG
IFI6	8.09e-20	0.362411	0.99	0.991	2.07e-15	FCN1.Mono	IFI6
ROGDI	8.71e-19	0.297115	0.495	0.368	2.23e-14	FCN1.Mono	ROGDI
AREG	2.32e-18	0.637071	0.309	0.192	5.92e-14	FCN1.Mono	AREG
PDGFD	2.63e-18	0.301254	0.31	0.19	6.72e-14	FCN1.Mono	PDGFD
INHBA1	9.5e-18	0.374059	0.957	0.88	2.43e-13	FCN1.Mono	INHBA
HDDC21	1.04e-17	0.251086	0.9	0.876	2.65e-13	FCN1.Mono	HDDC2
GYPC1	4.35e-17	0.257694	0.965	0.948	1.11e-12	FCN1.Mono	GYPC
MGST11	1.26e-16	0.323414	0.788	0.754	3.21e-12	FCN1.Mono	MGST1
TRIM22	2.36e-16	0.270771	0.874	0.83	6.03e-12	FCN1.Mono	TRIM22
CYSLTR11	3.36e-16	0.271303	0.59	0.475	8.59e-12	FCN1.Mono	CYSLTR1
CD55	6.57e-16	0.262543	0.901	0.868	1.68e-11	FCN1.Mono	CD55
BST1	1.07e-15	0.311731	0.696	0.624	2.74e-11	FCN1.Mono	BST1
SOCS3	1.78e-15	0.32779	0.639	0.539	4.54e-11	FCN1.Mono	SOCS3
RASGRP21	3.2e-15	0.285958	0.603	0.499	8.18e-11	FCN1.Mono	RASGRP2
STAC3	6.6e-15	0.292232	0.44	0.338	1.69e-10	FCN1.Mono	STAC3
AKAP51	1.28e-14	0.266061	0.319	0.215	3.27e-10	FCN1.Mono	AKAP5
MEGF9	1.39e-14	0.291635	0.724	0.66	3.55e-10	FCN1.Mono	MEGF9
FPR1	1.95e-14	0.256012	0.659	0.556	4.98e-10	FCN1.Mono	FPR1
OSM	2.04e-14	0.332237	0.367	0.252	5.21e-10	FCN1.Mono	OSM
ASGR1	2.72e-14	0.287582	0.628	0.543	6.95e-10	FCN1.Mono	ASGR1
STK17B	4e-14	0.251142	0.774	0.709	1.02e-09	FCN1.Mono	STK17B
RILPL2	6.6e-14	0.251487	0.769	0.703	1.69e-09	FCN1.Mono	RILPL2
HLA-F	1.48e-12	0.250349	0.895	0.889	3.78e-08	FCN1.Mono	HLA-F
ETS2	1.81e-12	0.265274	0.707	0.634	4.62e-08	FCN1.Mono	ETS2
FCGR2A	1.84e-12	0.267023	0.978	0.968	4.69e-08	FCN1.Mono	FCGR2A
FOLR31	3.73e-12	0.575795	0.653	0.6	9.52e-08	FCN1.Mono	FOLR3
IL7R	9.99e-12	0.332743	0.909	0.897	2.55e-07	FCN1.Mono	IL7R
HERC5	2.91e-11	0.257318	0.596	0.523	7.43e-07	FCN1.Mono	HERC5
IFITM3	4.38e-11	0.310643	0.873	0.857	1.12e-06	FCN1.Mono	IFITM3
GPR65	2.45e-09	0.277499	0.709	0.692	6.25e-05	FCN1.Mono	GPR65
MPEG1	3.92e-09	0.256523	0.579	0.51	0.00010016	FCN1.Mono	MPEG1
IGFBP2	2.03e-08	0.272866	0.39	0.305	0.000518403	FCN1.Mono	IGFBP2
ISG15	6.3e-08	0.279169	0.888	0.887	0.00160971	FCN1.Mono	ISG15
HLA-DRB51	9.19e-06	0.253769	0.92	0.908	0.234722	FCN1.Mono	HLA-DRB5
IFRD1	1.67e-05	0.331928	0.464	0.417	0.426911	FCN1.Mono	IFRD1
ACKR31	3.21e-05	0.263507	0.378	0.333	0.820362	FCN1.Mono	ACKR3
CCL21	4.62e-196	2.31382	0.77	0.233	1.18e-191	CCL2.Mono	CCL2
CD48	1.08e-166	1.33662	0.718	0.24	2.75e-162	CCL2.Mono	CD48
RPL13	4.09e-166	0.773067	1	1	1.04e-161	CCL2.Mono	RPL13
RPL36A	1.91e-157	0.900444	1	1	4.88e-153	CCL2.Mono	RPL36A
RPS8	2.72e-144	0.743259	1	1	6.95e-140	CCL2.Mono	RPS8
RPL35A	4.52e-143	0.727409	1	1	1.15e-138	CCL2.Mono	RPL35A
RPL10	1.45e-142	0.757913	1	1	3.71e-138	CCL2.Mono	RPL10
RPS6	6.39e-140	0.730839	1	1	1.63e-135	CCL2.Mono	RPS6
RPL18	3.15e-135	0.717202	1	1	8.03e-131	CCL2.Mono	RPL18
RPL34	7.91e-135	0.736238	1	1	2.02e-130	CCL2.Mono	RPL34
CD300E	4.49e-134	1.04573	0.493	0.131	1.15e-129	CCL2.Mono	CD300E
EIF1	1.34e-133	0.731505	1	1	3.42e-129	CCL2.Mono	EIF1
RPL24	3.87e-133	0.680655	1	1	9.89e-129	CCL2.Mono	RPL24
RPL9	7.07e-131	0.595446	1	1	1.81e-126	CCL2.Mono	RPL9
SNHG5	9.33e-129	1.01836	0.994	0.904	2.38e-124	CCL2.Mono	SNHG5
RPL18A	9.54e-124	0.669897	1	1	2.44e-119	CCL2.Mono	RPL18A
RPL26	1.23e-123	0.697685	1	1	3.13e-119	CCL2.Mono	RPL26
RPL5	4.99e-123	0.745055	1	1	1.28e-118	CCL2.Mono	RPL5
RPL32	5.95e-122	0.625683	1	1	1.52e-117	CCL2.Mono	RPL32
RPL7	3.13e-121	0.698775	1	1	8.01e-117	CCL2.Mono	RPL7
RPL8	3.62e-116	0.671108	1	1	9.24e-112	CCL2.Mono	RPL8
RPS7	4.54e-116	0.635748	1	1	1.16e-111	CCL2.Mono	RPS7
MALAT11	2.21e-115	0.862984	1	0.999	5.64e-111	CCL2.Mono	MALAT1
RPS24	3.41e-115	0.572825	1	1	8.7e-111	CCL2.Mono	RPS24
RPL37A	1.22e-114	0.657209	1	1	3.11e-110	CCL2.Mono	RPL37A
CKLF1	2.13e-114	1.16763	0.998	0.965	5.44e-110	CCL2.Mono	CKLF
RPL6	8.17e-114	0.665942	1	1	2.09e-109	CCL2.Mono	RPL6
CCR21	4.91e-113	0.836618	0.409	0.101	1.25e-108	CCL2.Mono	CCR2
RPS14	4.96e-113	0.586487	1	1	1.27e-108	CCL2.Mono	RPS14
RPS3A	2e-112	0.608529	1	1	5.12e-108	CCL2.Mono	RPS3A
RPS11	2.45e-111	0.563991	1	1	6.26e-107	CCL2.Mono	RPS11
RPL39	6.51e-111	0.561415	1	1	1.66e-106	CCL2.Mono	RPL39
RPL37	7.12e-111	0.645001	1	1	1.82e-106	CCL2.Mono	RPL37
IER31	2.16e-110	1.21257	0.796	0.439	5.51e-106	CCL2.Mono	IER3
RPS16	1.24e-108	0.547111	1	1	3.18e-104	CCL2.Mono	RPS16
LIMS11	1.62e-108	0.916598	0.993	0.917	4.14e-104	CCL2.Mono	LIMS1
RPS15A	1.23e-107	0.591234	1	1	3.15e-103	CCL2.Mono	RPS15A
RPLP2	1.43e-107	0.483528	1	1	3.66e-103	CCL2.Mono	RPLP2
RPL23	1.84e-107	0.577321	1	1	4.71e-103	CCL2.Mono	RPL23
RPS17	6.53e-106	0.655378	1	1	1.67e-101	CCL2.Mono	RPS17
CST6	1.23e-105	0.920175	0.364	0.087	3.15e-101	CCL2.Mono	CST6
H3F3B	4.44e-105	0.647615	1	0.999	1.13e-100	CCL2.Mono	H3F3B
EEF1B2	4.48e-105	0.717122	1	0.999	1.15e-100	CCL2.Mono	EEF1B2
RPL36	4.45e-103	0.587295	1	1	1.14e-98	CCL2.Mono	RPL36
RPL29	2.44e-102	0.581621	1	1	6.24e-98	CCL2.Mono	RPL29
RPL17	2.11e-99	0.566267	1	1	5.39e-95	CCL2.Mono	RPL17
C15orf48	2.48e-99	1.33348	0.865	0.527	6.34e-95	CCL2.Mono	C15orf48
RPL41	9.12e-97	0.464271	1	1	2.33e-92	CCL2.Mono	RPL41
RACK1	1.44e-96	0.665523	1	0.999	3.67e-92	CCL2.Mono	RACK1
RPS12	2.46e-96	0.553937	1	1	6.3e-92	CCL2.Mono	RPS12
RPL10A	3.28e-96	0.657196	1	1	8.37e-92	CCL2.Mono	RPL10A
RPS28	4.17e-95	0.498911	1	1	1.07e-90	CCL2.Mono	RPS28
RPS3	1.03e-94	0.569517	1	1	2.63e-90	CCL2.Mono	RPS3
RPL13A	3.15e-94	0.579485	1	1	8.06e-90	CCL2.Mono	RPL13A
RPS18	4.99e-94	0.607632	1	1	1.27e-89	CCL2.Mono	RPS18
RPL11	2.08e-93	0.51461	1	1	5.32e-89	CCL2.Mono	RPL11
TPT1	1.56e-92	0.523204	1	1	3.98e-88	CCL2.Mono	TPT1
RPS9	4.35e-90	0.481725	1	1	1.11e-85	CCL2.Mono	RPS9
GAS5	8.83e-90	1.017	0.948	0.73	2.25e-85	CCL2.Mono	GAS5
RPS23	4.73e-89	0.570177	1	1	1.21e-84	CCL2.Mono	RPS23
RPS27	8.83e-89	0.549865	1	1	2.26e-84	CCL2.Mono	RPS27
RPL14	1.02e-88	0.531058	1	1	2.6e-84	CCL2.Mono	RPL14
TNFSF14	8.45e-88	0.510305	0.28	0.06	2.16e-83	CCL2.Mono	TNFSF14
RPS13	5.21e-87	0.554155	1	1	1.33e-82	CCL2.Mono	RPS13
ATF41	9.49e-87	0.889593	0.88	0.638	2.42e-82	CCL2.Mono	ATF4
CD44	4.27e-85	0.717903	0.998	0.998	1.09e-80	CCL2.Mono	CD44
SPHK1	2.05e-84	0.541412	0.284	0.064	5.23e-80	CCL2.Mono	SPHK1
RPL31	2.4e-84	0.625862	1	0.999	6.13e-80	CCL2.Mono	RPL31
RPL19	1.35e-83	0.492357	1	1	3.45e-79	CCL2.Mono	RPL19
RPL21	1.41e-83	0.482803	1	1	3.59e-79	CCL2.Mono	RPL21
ZFAS1	1.98e-83	0.792789	0.998	0.977	5.07e-79	CCL2.Mono	ZFAS1
EEF1A1	2.68e-83	0.469856	1	1	6.84e-79	CCL2.Mono	EEF1A1
CLEC5A1	2.8e-82	1.05217	0.776	0.493	7.16e-78	CCL2.Mono	CLEC5A
VEGFA	6.96e-82	0.963706	0.477	0.178	1.78e-77	CCL2.Mono	VEGFA
RPL7A	1.78e-80	0.554193	1	1	4.55e-76	CCL2.Mono	RPL7A
RPS2	2.44e-80	0.491813	1	1	6.24e-76	CCL2.Mono	RPS2
SLC7A5	7.24e-80	0.53929	0.293	0.071	1.85e-75	CCL2.Mono	SLC7A5
SLC25A37	7.37e-79	1.01936	0.589	0.29	1.88e-74	CCL2.Mono	SLC25A37
SLC25A6	5.5e-78	0.697094	0.998	0.982	1.41e-73	CCL2.Mono	SLC25A6
EEF2	7.4e-77	0.617799	1	0.981	1.89e-72	CCL2.Mono	EEF2
RPL30	9.72e-77	0.458719	1	1	2.48e-72	CCL2.Mono	RPL30
RPLP1	1.13e-76	0.39591	1	1	2.87e-72	CCL2.Mono	RPLP1
HMGA1	1.18e-76	0.977379	0.733	0.507	3.01e-72	CCL2.Mono	HMGA1
RPLP0	7.18e-76	0.545419	1	1	1.83e-71	CCL2.Mono	RPLP0
RGS101	1.16e-75	0.702263	0.993	0.903	2.96e-71	CCL2.Mono	RGS10
RPL22	2.59e-74	0.469787	1	1	6.62e-70	CCL2.Mono	RPL22
NACA	7.94e-74	0.484999	1	1	2.03e-69	CCL2.Mono	NACA
RPL23A	2.65e-73	0.476682	1	1	6.76e-69	CCL2.Mono	RPL23A
RPS27A	5.87e-72	0.415413	1	1	1.5e-67	CCL2.Mono	RPS27A
PLP21	6.19e-71	0.828335	0.843	0.637	1.58e-66	CCL2.Mono	PLP2
RPL3	1.4e-70	0.523768	1	1	3.57e-66	CCL2.Mono	RPL3
RPL28	2.32e-69	0.39562	1	1	5.93e-65	CCL2.Mono	RPL28
FPR31	5.05e-68	0.798398	0.91	0.712	1.29e-63	CCL2.Mono	FPR3
CEBPB	1.6e-67	0.620108	1	0.998	4.07e-63	CCL2.Mono	CEBPB
RPS15	1.26e-66	0.414406	1	1	3.21e-62	CCL2.Mono	RPS15
CEP170	5.05e-66	0.781428	0.968	0.894	1.29e-61	CCL2.Mono	CEP170
PABPC1	2.15e-65	0.509075	1	0.999	5.49e-61	CCL2.Mono	PABPC1
EEF1D	1.02e-64	0.552622	1	0.982	2.6e-60	CCL2.Mono	EEF1D
CTSH	8.84e-64	0.559159	1	0.986	2.26e-59	CCL2.Mono	CTSH
KCTD121	1.48e-63	0.612227	0.993	0.954	3.77e-59	CCL2.Mono	KCTD12
RPL15	5.12e-63	0.413451	1	1	1.31e-58	CCL2.Mono	RPL15
RPS21	1.3e-62	0.438487	1	1	3.31e-58	CCL2.Mono	RPS21
RPL12	1.98e-60	0.439431	1	1	5.07e-56	CCL2.Mono	RPL12
ELK31	4e-60	0.722269	0.548	0.28	1.02e-55	CCL2.Mono	ELK3
CORO1A1	2.17e-59	0.70145	0.686	0.404	5.55e-55	CCL2.Mono	CORO1A
TGFBR11	2.24e-59	0.810052	0.785	0.59	5.73e-55	CCL2.Mono	TGFBR1
RPL4	3.88e-59	0.514048	1	0.997	9.9e-55	CCL2.Mono	RPL4
CD93	4e-58	0.710561	0.465	0.204	1.02e-53	CCL2.Mono	CD93
RPL27A	5.08e-57	0.392695	1	1	1.3e-52	CCL2.Mono	RPL27A
CXCR4	8.85e-57	0.909496	0.574	0.301	2.26e-52	CCL2.Mono	CXCR4
BTG11	2.59e-56	0.620047	0.996	0.981	6.62e-52	CCL2.Mono	BTG1
VMP1	6.1e-56	0.752676	0.985	0.883	1.56e-51	CCL2.Mono	VMP1
RPL27	7.93e-56	0.371032	1	1	2.02e-51	CCL2.Mono	RPL27
UPP1	8.8e-56	0.640776	0.993	0.936	2.25e-51	CCL2.Mono	UPP1
NEAT11	1.12e-55	0.671614	1	0.993	2.87e-51	CCL2.Mono	NEAT1
FLOT1	2.74e-55	0.653787	0.892	0.732	7.01e-51	CCL2.Mono	FLOT1
RPL38	4.86e-55	0.404359	1	1	1.24e-50	CCL2.Mono	RPL38
MT-ND1	5.52e-55	0.489476	1	1	1.41e-50	CCL2.Mono	MT-ND1
GK	5.97e-54	0.777849	0.852	0.658	1.53e-49	CCL2.Mono	GK
LIMD21	9.49e-54	0.55798	0.411	0.166	2.42e-49	CCL2.Mono	LIMD2
MAP3K21	2.57e-53	0.661234	0.925	0.809	6.57e-49	CCL2.Mono	MAP3K2
TYMP1	2.93e-53	0.523328	0.998	0.977	7.48e-49	CCL2.Mono	TYMP
AC020916.11	3.45e-53	0.844336	0.564	0.322	8.82e-49	CCL2.Mono	AC020916.1
METRNL1	4.17e-53	0.653405	0.905	0.748	1.06e-48	CCL2.Mono	METRNL
RPL35	4.21e-53	0.387555	1	1	1.08e-48	CCL2.Mono	RPL35
EEF1G	9.36e-53	0.466846	1	0.991	2.39e-48	CCL2.Mono	EEF1G
RPS25	1.77e-52	0.374783	1	1	4.51e-48	CCL2.Mono	RPS25
MEF2A1	4.67e-52	0.659466	0.914	0.767	1.19e-47	CCL2.Mono	MEF2A
PLSCR1	1.05e-51	0.572418	0.989	0.919	2.69e-47	CCL2.Mono	PLSCR1
SKIL	1.56e-51	0.591862	0.983	0.92	3.98e-47	CCL2.Mono	SKIL
BTF3	2.79e-51	0.438077	1	0.995	7.12e-47	CCL2.Mono	BTF3
MTHFD21	3.68e-51	0.761364	0.761	0.588	9.39e-47	CCL2.Mono	MTHFD2
IER2	4.51e-51	0.779549	0.72	0.543	1.15e-46	CCL2.Mono	IER2
FAU	8.58e-50	0.327622	1	1	2.19e-45	CCL2.Mono	FAU
LGALS2	1.98e-49	0.472037	0.316	0.108	5.06e-45	CCL2.Mono	LGALS2
EMP11	7.61e-49	1.22129	0.684	0.459	1.94e-44	CCL2.Mono	EMP1
ADAM8	1.26e-48	0.492072	0.282	0.094	3.21e-44	CCL2.Mono	ADAM8
NAP1L1	1.35e-48	0.513348	1	0.994	3.46e-44	CCL2.Mono	NAP1L1
RBM3	1.73e-48	0.446996	0.998	0.985	4.43e-44	CCL2.Mono	RBM3
ANP32B	1.27e-47	0.473464	0.996	0.98	3.23e-43	CCL2.Mono	ANP32B
RPS4X	4e-47	0.428281	1	1	1.02e-42	CCL2.Mono	RPS4X
KCNN41	2.03e-46	0.484006	0.323	0.122	5.19e-42	CCL2.Mono	KCNN4
PTMA	2.46e-46	0.348525	1	1	6.28e-42	CCL2.Mono	PTMA
UBA52	6.51e-46	0.320665	1	1	1.66e-41	CCL2.Mono	UBA52
RPS29	8.72e-46	0.478734	1	1	2.23e-41	CCL2.Mono	RPS29
G0S2	2.08e-45	0.91018	0.258	0.082	5.32e-41	CCL2.Mono	G0S2
HBEGF	1.9e-44	0.771878	0.981	0.88	4.86e-40	CCL2.Mono	HBEGF
PCBP1	2.18e-44	0.426133	1	0.984	5.57e-40	CCL2.Mono	PCBP1
EVI2A	9.46e-44	0.693975	0.822	0.669	2.42e-39	CCL2.Mono	EVI2A
MXD1	1.32e-43	0.795826	0.669	0.481	3.36e-39	CCL2.Mono	MXD1
TNFRSF1B	1.84e-43	0.718679	0.636	0.45	4.7e-39	CCL2.Mono	TNFRSF1B
PAG1	2.48e-43	0.579028	0.929	0.74	6.33e-39	CCL2.Mono	PAG1
DDX21	2.74e-43	0.555839	0.985	0.929	6.99e-39	CCL2.Mono	DDX21
SLC2A3	5.95e-43	0.768442	0.789	0.575	1.52e-38	CCL2.Mono	SLC2A3
RPS26	6.7e-43	0.368238	1	1	1.71e-38	CCL2.Mono	RPS26
PPIF	9.08e-43	0.792614	0.561	0.363	2.32e-38	CCL2.Mono	PPIF
DDX17	1.06e-42	0.454516	0.991	0.939	2.71e-38	CCL2.Mono	DDX17
HNRNPA1	2e-42	0.497904	0.993	0.938	5.1e-38	CCL2.Mono	HNRNPA1
OSM1	1.41e-41	0.893121	0.473	0.25	3.61e-37	CCL2.Mono	OSM
PLXDC21	1.36e-40	0.455624	0.998	0.994	3.47e-36	CCL2.Mono	PLXDC2
DSE	7.91e-40	0.554979	0.97	0.895	2.02e-35	CCL2.Mono	DSE
LSP11	1.84e-39	0.547833	0.959	0.815	4.7e-35	CCL2.Mono	LSP1
NAMPT	2.52e-39	0.694312	0.985	0.896	6.43e-35	CCL2.Mono	NAMPT
BACH1	3.43e-39	0.549201	0.953	0.84	8.76e-35	CCL2.Mono	BACH1
RSL24D1	3.73e-39	0.474107	0.991	0.905	9.54e-35	CCL2.Mono	RSL24D1
CD180	5.19e-39	0.486297	0.325	0.135	1.33e-34	CCL2.Mono	CD180
SLC11A1	9.72e-39	0.492971	0.993	0.965	2.48e-34	CCL2.Mono	SLC11A1
HIF1A	1.25e-38	0.635892	0.736	0.586	3.18e-34	CCL2.Mono	HIF1A
DDX5	2.13e-38	0.373633	1	0.994	5.44e-34	CCL2.Mono	DDX5
KDM7A1	2.43e-38	0.559141	0.409	0.207	6.21e-34	CCL2.Mono	KDM7A
TUT4	5.32e-38	0.687043	0.675	0.515	1.36e-33	CCL2.Mono	TUT4
BTG2	1.43e-37	0.744782	0.778	0.579	3.66e-33	CCL2.Mono	BTG2
MT-ATP61	1.62e-37	0.355783	1	1	4.15e-33	CCL2.Mono	MT-ATP6
SERPINB9	2.05e-37	0.575899	0.346	0.156	5.25e-33	CCL2.Mono	SERPINB9
SP100	2.26e-37	0.483223	0.989	0.918	5.77e-33	CCL2.Mono	SP100
RALA1	5.86e-37	0.653702	0.802	0.644	1.5e-32	CCL2.Mono	RALA
RPS5	1.07e-36	0.343996	1	1	2.73e-32	CCL2.Mono	RPS5
NPM1	1.08e-36	0.432751	0.998	0.992	2.76e-32	CCL2.Mono	NPM1
PLA2G7	1.58e-36	0.321079	0.516	0.271	4.04e-32	CCL2.Mono	PLA2G7
CNBP	2.22e-36	0.447435	0.996	0.97	5.66e-32	CCL2.Mono	CNBP
SNHG32	2.81e-36	0.539817	0.893	0.697	7.17e-32	CCL2.Mono	SNHG32
FOSB	3.36e-36	0.690182	0.312	0.134	8.58e-32	CCL2.Mono	FOSB
EMP31	4.4e-36	0.550573	1	0.994	1.12e-31	CCL2.Mono	EMP3
PTPRE1	6.5e-36	0.750654	0.641	0.467	1.66e-31	CCL2.Mono	PTPRE
HRH2	1.15e-35	0.358619	0.25	0.09	2.92e-31	CCL2.Mono	HRH2
SERINC51	1.98e-35	0.640047	0.581	0.407	5.05e-31	CCL2.Mono	SERINC5
METTL9	3.62e-35	0.654863	0.793	0.662	9.25e-31	CCL2.Mono	METTL9
TIMP1	4.27e-35	1.3389	0.985	0.914	1.09e-30	CCL2.Mono	TIMP1
SDS	1.43e-34	0.562961	0.262	0.094	3.65e-30	CCL2.Mono	SDS
EIF2S3	2.07e-34	0.481254	0.961	0.851	5.29e-30	CCL2.Mono	EIF2S3
CD551	2.9e-34	0.521557	0.976	0.865	7.39e-30	CCL2.Mono	CD55
SET1	4.91e-34	0.388413	1	0.984	1.25e-29	CCL2.Mono	SET
STK38L	6.57e-34	0.645707	0.439	0.254	1.68e-29	CCL2.Mono	STK38L
SGK3	1.01e-33	0.53358	0.929	0.824	2.59e-29	CCL2.Mono	SGK3
ATP1B3	2.23e-33	0.454333	0.994	0.962	5.71e-29	CCL2.Mono	ATP1B3
IVNS1ABP	5.46e-33	0.594935	0.789	0.655	1.4e-28	CCL2.Mono	IVNS1ABP
ZMIZ1	8.52e-33	0.541497	0.776	0.652	2.18e-28	CCL2.Mono	ZMIZ1
SLC38A2	1.49e-32	0.602687	0.688	0.556	3.8e-28	CCL2.Mono	SLC38A2
HNRNPA2B1	1.51e-32	0.354956	1	0.996	3.85e-28	CCL2.Mono	HNRNPA2B1
ARF61	1.63e-32	0.458682	0.979	0.902	4.16e-28	CCL2.Mono	ARF6
MBNL11	1.66e-32	0.441479	1	0.979	4.23e-28	CCL2.Mono	MBNL1
GAPDH1	2.1e-32	0.335903	1	0.994	5.37e-28	CCL2.Mono	GAPDH
VIM1	4.32e-32	0.482292	1	1	1.1e-27	CCL2.Mono	VIM
N4BP1	8.46e-32	0.510763	0.836	0.693	2.16e-27	CCL2.Mono	N4BP1
OSBPL81	1.26e-31	0.522812	0.972	0.891	3.21e-27	CCL2.Mono	OSBPL8
LCP2	1.54e-31	0.6474	0.755	0.644	3.94e-27	CCL2.Mono	LCP2
BHLHE40	3.24e-31	0.511441	0.903	0.775	8.29e-27	CCL2.Mono	BHLHE40
WARS	8.5e-31	0.475691	0.882	0.652	2.17e-26	CCL2.Mono	WARS
GABARAP	1.13e-30	0.280067	1	0.999	2.9e-26	CCL2.Mono	GABARAP
CFLAR	2.35e-30	0.449479	0.903	0.751	6.01e-26	CCL2.Mono	CFLAR
USP3	2.38e-30	0.494637	0.858	0.737	6.07e-26	CCL2.Mono	USP3
LAT2	2.85e-30	0.508465	0.779	0.65	7.29e-26	CCL2.Mono	LAT2
ADGRE2	5.01e-30	0.526497	0.413	0.233	1.28e-25	CCL2.Mono	ADGRE2
PLAUR	6.28e-30	0.477985	0.998	0.972	1.6e-25	CCL2.Mono	PLAUR
HM131	7.73e-30	0.551124	0.693	0.572	1.97e-25	CCL2.Mono	HM13
RPSA	9.03e-30	0.354685	1	0.999	2.31e-25	CCL2.Mono	RPSA
STAG2	2.26e-29	0.452688	0.86	0.703	5.78e-25	CCL2.Mono	STAG2
GPX7	5.16e-29	0.470064	0.338	0.174	1.32e-24	CCL2.Mono	GPX7
SLC8A11	5.47e-29	0.434432	0.944	0.864	1.4e-24	CCL2.Mono	SLC8A1
SNHG8	1.36e-28	0.480867	0.92	0.777	3.48e-24	CCL2.Mono	SNHG8
EIF2S2	1.63e-28	0.392765	0.993	0.962	4.16e-24	CCL2.Mono	EIF2S2
SNHG16	2.36e-28	0.570346	0.628	0.513	6.03e-24	CCL2.Mono	SNHG16
BCL2	2.41e-28	0.421192	0.271	0.12	6.16e-24	CCL2.Mono	BCL2
DNMT11	2.49e-28	0.591965	0.768	0.651	6.36e-24	CCL2.Mono	DNMT1
MTRNR2L121	2.57e-28	0.424463	1	0.989	6.57e-24	CCL2.Mono	MTRNR2L12
IGSF6	2.78e-28	0.492439	0.998	0.976	7.09e-24	CCL2.Mono	IGSF6
EIF3A	4.93e-28	0.373013	0.998	0.978	1.26e-23	CCL2.Mono	EIF3A
ZFYVE16	5.03e-28	0.49114	0.895	0.73	1.29e-23	CCL2.Mono	ZFYVE16
ATP6V1B2	6.16e-28	0.414395	0.976	0.889	1.57e-23	CCL2.Mono	ATP6V1B2
JUND	7.02e-28	0.430423	0.998	0.973	1.79e-23	CCL2.Mono	JUND
FUS	7.12e-28	0.450758	0.923	0.802	1.82e-23	CCL2.Mono	FUS
HNRNPD	2.65e-27	0.381923	0.979	0.887	6.77e-23	CCL2.Mono	HNRNPD
DDIT4	3.06e-27	0.533774	0.308	0.148	7.82e-23	CCL2.Mono	DDIT4
NDRG1	3.3e-27	0.48861	0.4	0.232	8.42e-23	CCL2.Mono	NDRG1
TAF1D	4.34e-27	0.451593	0.841	0.657	1.11e-22	CCL2.Mono	TAF1D
RPS4Y1	5.96e-27	0.515595	0.806	0.642	1.52e-22	CCL2.Mono	RPS4Y1
EMB1	6.05e-27	0.443041	0.533	0.342	1.54e-22	CCL2.Mono	EMB
NOP53	6.81e-27	0.406646	0.931	0.783	1.74e-22	CCL2.Mono	NOP53
FCN11	8.4e-27	0.390745	0.578	0.354	2.15e-22	CCL2.Mono	FCN1
IDS	1.14e-26	0.426059	0.989	0.928	2.9e-22	CCL2.Mono	IDS
TMA7	1.88e-26	0.304391	1	0.993	4.8e-22	CCL2.Mono	TMA7
SLC20A1	2.97e-26	0.520138	0.402	0.244	7.59e-22	CCL2.Mono	SLC20A1
HNRNPA3	4.26e-26	0.38574	0.989	0.961	1.09e-21	CCL2.Mono	HNRNPA3
JAK1	5.57e-26	0.39294	0.97	0.901	1.42e-21	CCL2.Mono	JAK1
FXYD5	6.42e-26	0.32621	0.994	0.959	1.64e-21	CCL2.Mono	FXYD5
MAP4K4	9.69e-26	0.565678	0.587	0.45	2.48e-21	CCL2.Mono	MAP4K4
LAPTM5	1.15e-25	0.28486	1	0.997	2.93e-21	CCL2.Mono	LAPTM5
YWHAZ1	2.32e-25	0.386462	1	0.997	5.93e-21	CCL2.Mono	YWHAZ
EIF4EBP1	3.3e-25	0.452797	0.959	0.886	8.44e-21	CCL2.Mono	EIF4EBP1
KHDRBS1	3.42e-25	0.353492	0.985	0.931	8.73e-21	CCL2.Mono	KHDRBS1
RPS10	3.71e-25	0.311421	1	0.978	9.47e-21	CCL2.Mono	RPS10
SERP1	3.77e-25	0.299228	1	0.996	9.62e-21	CCL2.Mono	SERP1
ATP6V1F	5.51e-25	0.327342	1	0.999	1.41e-20	CCL2.Mono	ATP6V1F
POLR1D	6.68e-25	0.385856	0.957	0.878	1.71e-20	CCL2.Mono	POLR1D
CCNI	1.08e-24	0.292816	0.998	0.998	2.75e-20	CCL2.Mono	CCNI
EIF4B	1.27e-24	0.37048	0.981	0.9	3.26e-20	CCL2.Mono	EIF4B
H2AFY	4.91e-24	0.279362	1	0.991	1.25e-19	CCL2.Mono	H2AFY
SH3KBP11	4.99e-24	0.522504	0.587	0.461	1.28e-19	CCL2.Mono	SH3KBP1
FGL21	5.64e-24	0.511975	0.652	0.502	1.44e-19	CCL2.Mono	FGL2
TARS	7.74e-24	0.471049	0.718	0.618	1.98e-19	CCL2.Mono	TARS
HNRNPK	9.17e-24	0.310129	0.996	0.983	2.34e-19	CCL2.Mono	HNRNPK
PIM1	1.04e-23	0.633488	0.55	0.41	2.67e-19	CCL2.Mono	PIM1
PLK3	1.04e-23	0.452082	0.368	0.217	2.67e-19	CCL2.Mono	PLK3
HNRNPM	1.1e-23	0.37388	0.931	0.84	2.81e-19	CCL2.Mono	HNRNPM
EIF3E	1.19e-23	0.330631	0.996	0.985	3.04e-19	CCL2.Mono	EIF3E
JUNB	1.29e-23	0.397817	0.994	0.931	3.28e-19	CCL2.Mono	JUNB
STK17B1	1.59e-23	0.456838	0.822	0.708	4.05e-19	CCL2.Mono	STK17B
FAM49B	2.04e-23	0.326612	0.989	0.932	5.21e-19	CCL2.Mono	FAM49B
PEA151	2.5e-23	0.50257	0.6	0.471	6.39e-19	CCL2.Mono	PEA15
ITGAX	4.04e-23	0.560599	0.636	0.518	1.03e-18	CCL2.Mono	ITGAX
TMEM123	4.39e-23	0.419362	0.957	0.9	1.12e-18	CCL2.Mono	TMEM123
CSNK1A1	1.34e-22	0.337354	0.991	0.951	3.42e-18	CCL2.Mono	CSNK1A1
OGFRL1	1.51e-22	0.451134	0.867	0.763	3.85e-18	CCL2.Mono	OGFRL1
MIF1	2.14e-22	0.366571	0.996	0.986	5.46e-18	CCL2.Mono	MIF
SQSTM1	2.75e-22	0.337369	0.991	0.932	7.03e-18	CCL2.Mono	SQSTM1
CLEC7A	3.64e-22	0.328777	0.994	0.971	9.3e-18	CCL2.Mono	CLEC7A
PLXNC11	4.52e-22	0.372405	0.387	0.215	1.16e-17	CCL2.Mono	PLXNC1
HNRNPF	6.47e-22	0.324721	0.991	0.922	1.65e-17	CCL2.Mono	HNRNPF
FNDC3A	7.21e-22	0.441443	0.836	0.721	1.84e-17	CCL2.Mono	FNDC3A
FYN	7.24e-22	0.379548	0.25	0.121	1.85e-17	CCL2.Mono	FYN
ATF3	8.47e-22	0.584871	0.297	0.158	2.16e-17	CCL2.Mono	ATF3
BATF3	8.8e-22	0.525347	0.479	0.338	2.25e-17	CCL2.Mono	BATF3
SGK11	1.21e-21	0.61967	0.74	0.621	3.1e-17	CCL2.Mono	SGK1
SFPQ	1.26e-21	0.363733	0.938	0.83	3.21e-17	CCL2.Mono	SFPQ
RYBP	1.4e-21	0.453494	0.464	0.328	3.57e-17	CCL2.Mono	RYBP
BLOC1S6	1.85e-21	0.372977	0.862	0.72	4.73e-17	CCL2.Mono	BLOC1S6
FPR11	2.15e-21	0.549309	0.665	0.558	5.49e-17	CCL2.Mono	FPR1
CYSTM1	2.54e-21	0.344041	0.895	0.737	6.49e-17	CCL2.Mono	CYSTM1
CALM11	3.87e-21	0.364567	1	1	9.88e-17	CCL2.Mono	CALM1
EIF3H	4.17e-21	0.310281	0.996	0.957	1.07e-16	CCL2.Mono	EIF3H
CIRBP	6.38e-21	0.32408	0.987	0.908	1.63e-16	CCL2.Mono	CIRBP
COMMD6	7.68e-21	0.278931	1	0.994	1.96e-16	CCL2.Mono	COMMD6
ZFP361	7.91e-21	0.430786	0.938	0.828	2.02e-16	CCL2.Mono	ZFP36
KLF61	1.15e-20	0.427548	0.989	0.907	2.94e-16	CCL2.Mono	KLF6
LACTB	1.51e-20	0.30922	0.989	0.946	3.85e-16	CCL2.Mono	LACTB
CREB51	1.92e-20	0.421697	0.482	0.336	4.9e-16	CCL2.Mono	CREB5
DOCK101	2.57e-20	0.435207	0.667	0.588	6.57e-16	CCL2.Mono	DOCK10
ARHGAP26	2.67e-20	0.488604	0.55	0.439	6.82e-16	CCL2.Mono	ARHGAP26
PRKCB1	3e-20	0.410555	0.445	0.295	7.65e-16	CCL2.Mono	PRKCB
ANKRD12	3.07e-20	0.337421	0.994	0.926	7.84e-16	CCL2.Mono	ANKRD12
MAT2A	3.81e-20	0.399294	0.798	0.704	9.72e-16	CCL2.Mono	MAT2A
FGFR1OP2	4.1e-20	0.341042	0.806	0.691	1.05e-15	CCL2.Mono	FGFR1OP2
IL1B	4.18e-20	0.820806	0.348	0.213	1.07e-15	CCL2.Mono	IL1B
SORL11	5.05e-20	0.493738	0.624	0.53	1.29e-15	CCL2.Mono	SORL1
RIPOR2	7.73e-20	0.483262	0.301	0.166	1.97e-15	CCL2.Mono	RIPOR2
OLR11	7.81e-20	0.297342	0.996	0.989	2e-15	CCL2.Mono	OLR1
TOMM20	8.68e-20	0.290088	0.996	0.973	2.22e-15	CCL2.Mono	TOMM20
UBC1	1.05e-19	0.273032	0.998	0.981	2.68e-15	CCL2.Mono	UBC
KLF10	1.85e-19	0.395278	0.637	0.524	4.73e-15	CCL2.Mono	KLF10
SEPTIN71	2.29e-19	0.273822	1	0.982	5.86e-15	CCL2.Mono	SEPTIN7
ZNF207	2.7e-19	0.345486	0.938	0.86	6.91e-15	CCL2.Mono	ZNF207
LGALS11	3.21e-19	0.259013	1	1	8.19e-15	CCL2.Mono	LGALS1
FOSL2	3.87e-19	0.451025	0.523	0.406	9.89e-15	CCL2.Mono	FOSL2
ZFP36L21	7.22e-19	0.377576	0.994	0.964	1.84e-14	CCL2.Mono	ZFP36L2
CYTOR	7.3e-19	0.545172	0.428	0.301	1.87e-14	CCL2.Mono	CYTOR
ZEB21	9.14e-19	0.392262	0.998	0.984	2.34e-14	CCL2.Mono	ZEB2
SRSF3	1.17e-18	0.31129	0.983	0.934	2.99e-14	CCL2.Mono	SRSF3
CSF3R	1.72e-18	0.52869	0.464	0.348	4.4e-14	CCL2.Mono	CSF3R
ST3GAL6	1.77e-18	0.475429	0.518	0.416	4.52e-14	CCL2.Mono	ST3GAL6
NCF2	1.78e-18	0.279306	1	0.994	4.54e-14	CCL2.Mono	NCF2
EIF3M	1.79e-18	0.32731	0.978	0.879	4.57e-14	CCL2.Mono	EIF3M
MOB3B1	1.92e-18	0.416488	0.826	0.731	4.91e-14	CCL2.Mono	MOB3B
SEC11A	2.17e-18	0.265543	1	0.995	5.53e-14	CCL2.Mono	SEC11A
DDIT3	2.63e-18	0.503037	0.436	0.311	6.72e-14	CCL2.Mono	DDIT3
FOS1	2.94e-18	0.433711	0.991	0.97	7.52e-14	CCL2.Mono	FOS
DNAJC7	3.25e-18	0.314179	0.938	0.846	8.29e-14	CCL2.Mono	DNAJC7
PGLS	4.52e-18	0.301701	0.987	0.919	1.15e-13	CCL2.Mono	PGLS
CSGALNACT2	4.53e-18	0.462637	0.594	0.518	1.16e-13	CCL2.Mono	CSGALNACT2
POU2F21	4.7e-18	0.469337	0.282	0.156	1.2e-13	CCL2.Mono	POU2F2
DDX60L	4.83e-18	0.369465	0.85	0.708	1.23e-13	CCL2.Mono	DDX60L
STK24	7.46e-18	0.48409	0.594	0.505	1.9e-13	CCL2.Mono	STK24
AHR1	7.85e-18	0.458622	0.836	0.767	2e-13	CCL2.Mono	AHR
SAT1	7.89e-18	0.288327	0.996	0.997	2.01e-13	CCL2.Mono	SAT1
XAF1	9.01e-18	0.447571	0.869	0.773	2.3e-13	CCL2.Mono	XAF1
MGAT4A	1.14e-17	0.366774	0.856	0.739	2.91e-13	CCL2.Mono	MGAT4A
MT-ND4	1.19e-17	0.250317	1	1	3.05e-13	CCL2.Mono	MT-ND4
CLEC4A	1.85e-17	0.487133	0.677	0.581	4.72e-13	CCL2.Mono	CLEC4A
YBX3	1.95e-17	0.310221	0.987	0.942	4.99e-13	CCL2.Mono	YBX3
SAT2	2.25e-17	0.335727	0.877	0.756	5.75e-13	CCL2.Mono	SAT2
CBX3	2.25e-17	0.299207	0.979	0.95	5.75e-13	CCL2.Mono	CBX3
QPCT1	2.31e-17	0.43066	0.445	0.316	5.91e-13	CCL2.Mono	QPCT
EIF3L	5.19e-17	0.3244	0.774	0.625	1.33e-12	CCL2.Mono	EIF3L
AC004687.1	5.83e-17	0.403301	0.336	0.215	1.49e-12	CCL2.Mono	AC004687.1
ARL8B	5.98e-17	0.302245	0.936	0.84	1.53e-12	CCL2.Mono	ARL8B
SDCCAG8	6.26e-17	0.345044	0.935	0.839	1.6e-12	CCL2.Mono	SDCCAG8
PMP221	7.18e-17	0.416988	0.721	0.634	1.83e-12	CCL2.Mono	PMP22
ADSS	7.6e-17	0.402374	0.77	0.663	1.94e-12	CCL2.Mono	ADSS
EIF4G2	8.63e-17	0.268968	0.998	0.986	2.2e-12	CCL2.Mono	EIF4G2
GPR1831	9.4e-17	0.352844	0.329	0.187	2.4e-12	CCL2.Mono	GPR183
MYADM1	1.19e-16	0.395471	0.979	0.926	3.05e-12	CCL2.Mono	MYADM
SNHG7	1.21e-16	0.475163	0.426	0.325	3.1e-12	CCL2.Mono	SNHG7
ATP13A3	1.22e-16	0.616565	0.607	0.525	3.13e-12	CCL2.Mono	ATP13A3
IRAK1	1.66e-16	0.406464	0.48	0.369	4.23e-12	CCL2.Mono	IRAK1
BOD1L1	1.89e-16	0.331447	0.955	0.874	4.82e-12	CCL2.Mono	BOD1L1
DPYD1	2.01e-16	0.379614	0.667	0.612	5.12e-12	CCL2.Mono	DPYD
IFNGR2	2.53e-16	0.353957	0.92	0.838	6.47e-12	CCL2.Mono	IFNGR2
IRF2BP2	2.54e-16	0.370017	0.886	0.8	6.48e-12	CCL2.Mono	IRF2BP2
IQGAP11	2.55e-16	0.257574	1	0.993	6.51e-12	CCL2.Mono	IQGAP1
HOMER3	2.83e-16	0.353349	0.312	0.191	7.23e-12	CCL2.Mono	HOMER3
KRAS1	2.85e-16	0.349906	0.888	0.792	7.27e-12	CCL2.Mono	KRAS
MGAT1	2.93e-16	0.323675	0.942	0.865	7.48e-12	CCL2.Mono	MGAT1
PRELID1	3.06e-16	0.263324	0.994	0.971	7.81e-12	CCL2.Mono	PRELID1
LILRB31	4.13e-16	0.368405	0.72	0.651	1.06e-11	CCL2.Mono	LILRB3
HIST1H1E	5.33e-16	0.400948	0.465	0.349	1.36e-11	CCL2.Mono	HIST1H1E
FHL3	5.51e-16	0.396816	0.359	0.24	1.41e-11	CCL2.Mono	FHL3
SLC7A1	7.91e-16	0.345073	0.293	0.177	2.02e-11	CCL2.Mono	SLC7A1
HNRNPH1	1.42e-15	0.315915	0.819	0.741	3.63e-11	CCL2.Mono	HNRNPH1
ACSL3	1.44e-15	0.332079	0.735	0.628	3.69e-11	CCL2.Mono	ACSL3
AC008105.3	1.68e-15	0.312955	0.282	0.166	4.29e-11	CCL2.Mono	AC008105.3
LINC01578	2.16e-15	0.320496	0.721	0.628	5.53e-11	CCL2.Mono	LINC01578
MCL1	2.17e-15	0.340505	0.996	0.964	5.53e-11	CCL2.Mono	MCL1
FMNL1	2.5e-15	0.328207	0.757	0.657	6.38e-11	CCL2.Mono	FMNL1
IARS	2.52e-15	0.385718	0.482	0.377	6.42e-11	CCL2.Mono	IARS
MT-ND4L	2.55e-15	0.306977	0.978	0.932	6.51e-11	CCL2.Mono	MT-ND4L
YWHAH1	3.22e-15	0.319163	1	0.996	8.22e-11	CCL2.Mono	YWHAH
CD69	3.69e-15	0.458125	0.406	0.276	9.43e-11	CCL2.Mono	CD69
PCBP2	3.71e-15	0.250876	0.998	0.984	9.49e-11	CCL2.Mono	PCBP2
UBXN1	4.76e-15	0.258071	0.985	0.912	1.22e-10	CCL2.Mono	UBXN1
CMTM3	5.01e-15	0.433311	0.548	0.469	1.28e-10	CCL2.Mono	CMTM3
SNHG6	5.55e-15	0.276842	0.991	0.944	1.42e-10	CCL2.Mono	SNHG6
PXK	6.27e-15	0.420839	0.439	0.345	1.6e-10	CCL2.Mono	PXK
LINC00963	6.87e-15	0.345196	0.68	0.568	1.75e-10	CCL2.Mono	LINC00963
XBP1	7.12e-15	0.281693	0.923	0.801	1.82e-10	CCL2.Mono	XBP1
PTBP3	7.21e-15	0.286247	0.981	0.929	1.84e-10	CCL2.Mono	PTBP3
EVI2B	8.19e-15	0.271397	1	0.976	2.09e-10	CCL2.Mono	EVI2B
HNRNPU	8.48e-15	0.251751	0.994	0.97	2.17e-10	CCL2.Mono	HNRNPU
SOCS31	9.27e-15	0.510328	0.617	0.543	2.37e-10	CCL2.Mono	SOCS3
CEBPG	9.82e-15	0.369507	0.564	0.491	2.51e-10	CCL2.Mono	CEBPG
IFI16	1.24e-14	0.275089	0.989	0.952	3.16e-10	CCL2.Mono	IFI16
LILRA2	1.53e-14	0.395421	0.363	0.25	3.91e-10	CCL2.Mono	LILRA2
FYB1	1.82e-14	0.33478	0.97	0.875	4.65e-10	CCL2.Mono	FYB1
BCL2A1	1.99e-14	0.359871	0.989	0.921	5.07e-10	CCL2.Mono	BCL2A1
ANKH	2.02e-14	0.401498	0.325	0.211	5.17e-10	CCL2.Mono	ANKH
WIPF1	2.07e-14	0.311893	0.83	0.738	5.28e-10	CCL2.Mono	WIPF1
DDX3X	2.4e-14	0.306968	0.936	0.841	6.12e-10	CCL2.Mono	DDX3X
EPRS	3.01e-14	0.322481	0.865	0.768	7.69e-10	CCL2.Mono	EPRS
MTRNR2L11	3.6e-14	0.473381	0.75	0.694	9.19e-10	CCL2.Mono	MTRNR2L1
BCL2L11	3.73e-14	0.48246	0.357	0.252	9.53e-10	CCL2.Mono	BCL2L11
SNHG29	4.59e-14	0.255703	1	0.992	1.17e-09	CCL2.Mono	SNHG29
SLC43A3	4.66e-14	0.388078	0.593	0.524	1.19e-09	CCL2.Mono	SLC43A3
STX6	5.36e-14	0.378581	0.705	0.651	1.37e-09	CCL2.Mono	STX6
SOCS1	5.44e-14	0.416074	0.361	0.246	1.39e-09	CCL2.Mono	SOCS1
NOL7	6.41e-14	0.275047	0.97	0.901	1.64e-09	CCL2.Mono	NOL7
MX2	6.67e-14	0.570353	0.422	0.327	1.7e-09	CCL2.Mono	MX2
KLHL5	6.87e-14	0.346015	0.293	0.185	1.75e-09	CCL2.Mono	KLHL5
USP15	7.49e-14	0.290476	0.933	0.842	1.91e-09	CCL2.Mono	USP15
UBALD2	7.65e-14	0.374138	0.516	0.432	1.95e-09	CCL2.Mono	UBALD2
HPSE	8.27e-14	0.518965	0.262	0.16	2.11e-09	CCL2.Mono	HPSE
RPS6KA31	8.32e-14	0.323295	0.787	0.685	2.13e-09	CCL2.Mono	RPS6KA3
VSIR	1.05e-13	0.370042	0.402	0.29	2.68e-09	CCL2.Mono	VSIR
MCUB	1.25e-13	0.357696	0.673	0.579	3.2e-09	CCL2.Mono	MCUB
RNF7	1.32e-13	0.266524	0.987	0.949	3.36e-09	CCL2.Mono	RNF7
AQP9	1.37e-13	0.490894	0.628	0.572	3.5e-09	CCL2.Mono	AQP9
HEBP2	1.48e-13	0.287902	0.839	0.723	3.78e-09	CCL2.Mono	HEBP2
TGFBI1	1.53e-13	0.33655	0.959	0.91	3.9e-09	CCL2.Mono	TGFBI
CHD1	1.64e-13	0.316996	0.677	0.602	4.19e-09	CCL2.Mono	CHD1
ITGAV	2.18e-13	0.423581	0.55	0.482	5.57e-09	CCL2.Mono	ITGAV
SLC44A1	2.49e-13	0.433277	0.383	0.283	6.37e-09	CCL2.Mono	SLC44A1
SMG1	2.62e-13	0.348311	0.665	0.605	6.68e-09	CCL2.Mono	SMG1
RSRP1	3.22e-13	0.300863	0.856	0.745	8.23e-09	CCL2.Mono	RSRP1
ATP1A1	3.34e-13	0.291341	0.811	0.711	8.53e-09	CCL2.Mono	ATP1A1
MT-ATP8	4.18e-13	0.289279	0.837	0.743	1.07e-08	CCL2.Mono	MT-ATP8
EIF3J	5.76e-13	0.317331	0.708	0.645	1.47e-08	CCL2.Mono	EIF3J
LHFPL21	6.17e-13	0.336515	0.671	0.599	1.58e-08	CCL2.Mono	LHFPL2
DAZAP2	7.46e-13	0.271147	0.923	0.86	1.91e-08	CCL2.Mono	DAZAP2
AZI2	8.11e-13	0.304261	0.871	0.733	2.07e-08	CCL2.Mono	AZI2
FGR	8.66e-13	0.411902	0.594	0.517	2.21e-08	CCL2.Mono	FGR
RBM47	8.92e-13	0.296188	0.985	0.911	2.28e-08	CCL2.Mono	RBM47
SHOC2	9.68e-13	0.260308	0.8	0.673	2.47e-08	CCL2.Mono	SHOC2
SMCHD1	1.01e-12	0.379493	0.688	0.617	2.59e-08	CCL2.Mono	SMCHD1
LDLRAD3	1.13e-12	0.335598	0.25	0.152	2.89e-08	CCL2.Mono	LDLRAD3
GNAQ	1.32e-12	0.267061	0.951	0.867	3.37e-08	CCL2.Mono	GNAQ
STK4	1.51e-12	0.270098	0.944	0.878	3.86e-08	CCL2.Mono	STK4
EIF3F	1.52e-12	0.260808	0.978	0.908	3.88e-08	CCL2.Mono	EIF3F
KPNB1	1.59e-12	0.279051	0.972	0.895	4.07e-08	CCL2.Mono	KPNB1
NFAT5	1.76e-12	0.394609	0.331	0.234	4.51e-08	CCL2.Mono	NFAT5
H1FX	1.83e-12	0.458226	0.495	0.412	4.68e-08	CCL2.Mono	H1FX
CELF2	1.94e-12	0.276448	0.886	0.789	4.96e-08	CCL2.Mono	CELF2
RAP2B1	2.03e-12	0.286679	0.787	0.744	5.18e-08	CCL2.Mono	RAP2B
SYF2	2.29e-12	0.254319	0.963	0.846	5.84e-08	CCL2.Mono	SYF2
CLEC12A1	2.59e-12	0.329684	0.97	0.86	6.63e-08	CCL2.Mono	CLEC12A
ANKRD11	2.76e-12	0.281287	0.91	0.807	7.04e-08	CCL2.Mono	ANKRD11
COTL1	2.91e-12	0.255941	0.998	0.993	7.44e-08	CCL2.Mono	COTL1
PSMA3-AS1	2.93e-12	0.373708	0.557	0.507	7.48e-08	CCL2.Mono	PSMA3-AS1
PRNP	3.15e-12	0.348751	0.742	0.66	8.06e-08	CCL2.Mono	PRNP
PNRC1	3.29e-12	0.266849	0.993	0.929	8.42e-08	CCL2.Mono	PNRC1
EIF3D	3.35e-12	0.260021	0.877	0.746	8.57e-08	CCL2.Mono	EIF3D
TNPO1	3.52e-12	0.277183	0.751	0.649	9e-08	CCL2.Mono	TNPO1
P2RX7	3.54e-12	0.406963	0.465	0.38	9.04e-08	CCL2.Mono	P2RX7
ASGR11	4.45e-12	0.348209	0.611	0.546	1.14e-07	CCL2.Mono	ASGR1
PNRC2	5.08e-12	0.250435	0.92	0.771	1.3e-07	CCL2.Mono	PNRC2
MX1	6.2e-12	0.460605	0.845	0.737	1.58e-07	CCL2.Mono	MX1
RSAD2	7.27e-12	0.482962	0.275	0.179	1.86e-07	CCL2.Mono	RSAD2
MORC3	8.98e-12	0.2738	0.677	0.598	2.29e-07	CCL2.Mono	MORC3
FAM102B	9.24e-12	0.380119	0.564	0.525	2.36e-07	CCL2.Mono	FAM102B
MDM4	1.08e-11	0.370035	0.518	0.449	2.76e-07	CCL2.Mono	MDM4
PABPC4	1.16e-11	0.267468	0.764	0.648	2.96e-07	CCL2.Mono	PABPC4
C9orf72	1.49e-11	0.340656	0.587	0.544	3.8e-07	CCL2.Mono	C9orf72
FNIP1	1.59e-11	0.331101	0.54	0.49	4.07e-07	CCL2.Mono	FNIP1
NSRP1	1.66e-11	0.262419	0.826	0.699	4.24e-07	CCL2.Mono	NSRP1
MED13L	1.67e-11	0.382184	0.553	0.506	4.26e-07	CCL2.Mono	MED13L
LUC7L3	1.79e-11	0.257026	0.897	0.791	4.57e-07	CCL2.Mono	LUC7L3
TET2	2e-11	0.355995	0.548	0.491	5.12e-07	CCL2.Mono	TET2
TNFAIP8	2.01e-11	0.2755	0.714	0.62	5.14e-07	CCL2.Mono	TNFAIP8
RBM25	2.21e-11	0.270824	0.974	0.897	5.63e-07	CCL2.Mono	RBM25
PSTPIP2	2.29e-11	0.292676	0.271	0.171	5.85e-07	CCL2.Mono	PSTPIP2
MTRNR2L8	2.43e-11	0.250935	0.994	0.952	6.2e-07	CCL2.Mono	MTRNR2L8
NUMB	2.51e-11	0.374432	0.589	0.561	6.4e-07	CCL2.Mono	NUMB
RALGDS	2.77e-11	0.352053	0.495	0.424	7.07e-07	CCL2.Mono	RALGDS
NR3C1	3.55e-11	0.258583	0.953	0.878	9.06e-07	CCL2.Mono	NR3C1
USP16	4.52e-11	0.253251	0.817	0.697	1.16e-06	CCL2.Mono	USP16
CAPN21	4.57e-11	0.323926	0.733	0.657	1.17e-06	CCL2.Mono	CAPN2
PTAFR	4.88e-11	0.310568	0.845	0.795	1.25e-06	CCL2.Mono	PTAFR
ARFGAP3	5.4e-11	0.369458	0.744	0.656	1.38e-06	CCL2.Mono	ARFGAP3
LITAF	5.61e-11	0.310949	1	0.998	1.43e-06	CCL2.Mono	LITAF
LRRC8C	6.07e-11	0.395435	0.493	0.436	1.55e-06	CCL2.Mono	LRRC8C
SEMA4D	6.48e-11	0.347317	0.353	0.265	1.65e-06	CCL2.Mono	SEMA4D
NUP214	8.12e-11	0.264881	0.914	0.784	2.07e-06	CCL2.Mono	NUP214
PTPN2	9.75e-11	0.250681	0.815	0.702	2.49e-06	CCL2.Mono	PTPN2
RSL1D1	1e-10	0.257188	0.974	0.886	2.56e-06	CCL2.Mono	RSL1D1
ERBIN	1.09e-10	0.32233	0.671	0.615	2.79e-06	CCL2.Mono	ERBIN
DENND1B	1.19e-10	0.413538	0.477	0.415	3.05e-06	CCL2.Mono	DENND1B
ACSL4	1.43e-10	0.286058	0.763	0.693	3.64e-06	CCL2.Mono	ACSL4
IL6R	1.9e-10	0.346033	0.325	0.235	4.85e-06	CCL2.Mono	IL6R
FNDC3B	2.31e-10	0.30283	0.974	0.925	5.89e-06	CCL2.Mono	FNDC3B
B3GNT5	2.35e-10	0.30533	0.68	0.612	6.01e-06	CCL2.Mono	B3GNT5
SENP6	2.41e-10	0.274727	0.744	0.657	6.15e-06	CCL2.Mono	SENP6
ITPRIPL21	2.45e-10	0.295216	0.675	0.625	6.26e-06	CCL2.Mono	ITPRIPL2
CHST11	3.36e-10	0.345872	0.512	0.448	8.58e-06	CCL2.Mono	CHST11
ETS21	3.77e-10	0.355912	0.682	0.637	9.64e-06	CCL2.Mono	ETS2
FNIP2	4.5e-10	0.541484	0.488	0.429	1.15e-05	CCL2.Mono	FNIP2
AP1S21	5e-10	0.309048	0.733	0.714	1.28e-05	CCL2.Mono	AP1S2
ACTN1	5.48e-10	0.254165	0.976	0.919	1.4e-05	CCL2.Mono	ACTN1
KLF3	5.57e-10	0.266651	0.705	0.625	1.42e-05	CCL2.Mono	KLF3
TLR21	5.6e-10	0.354137	0.436	0.352	1.43e-05	CCL2.Mono	TLR2
SMAD7	6.65e-10	0.263029	0.705	0.624	1.7e-05	CCL2.Mono	SMAD7
LILRB4	7.18e-10	0.269928	0.452	0.352	1.83e-05	CCL2.Mono	LILRB4
TES	7.33e-10	0.359419	0.454	0.381	1.87e-05	CCL2.Mono	TES
TANC2	7.48e-10	0.33573	0.566	0.484	1.91e-05	CCL2.Mono	TANC2
BAZ2B	7.86e-10	0.266118	0.798	0.687	2.01e-05	CCL2.Mono	BAZ2B
PHACTR1	8.21e-10	0.286019	0.766	0.647	2.1e-05	CCL2.Mono	PHACTR1
EZR1	8.84e-10	0.382756	0.869	0.765	2.26e-05	CCL2.Mono	EZR
HIPK3	9.47e-10	0.272067	0.662	0.599	2.42e-05	CCL2.Mono	HIPK3
CEBPD	9.56e-10	0.405177	0.594	0.539	2.44e-05	CCL2.Mono	CEBPD
CCND21	1.8e-09	0.272505	0.25	0.162	4.61e-05	CCL2.Mono	CCND2
ATF5	2.1e-09	0.395027	0.335	0.25	5.35e-05	CCL2.Mono	ATF5
SARS	2.54e-09	0.286624	0.589	0.537	6.48e-05	CCL2.Mono	SARS
TRIB1	2.58e-09	0.320013	0.37	0.293	6.59e-05	CCL2.Mono	TRIB1
C17orf49	2.8e-09	0.253194	0.701	0.608	7.15e-05	CCL2.Mono	C17orf49
KAT6A	3.07e-09	0.314523	0.486	0.431	7.84e-05	CCL2.Mono	KAT6A
CHD2	3.35e-09	0.304975	0.596	0.527	8.56e-05	CCL2.Mono	CHD2
LINC01678	4.49e-09	0.291316	0.265	0.183	0.000114698	CCL2.Mono	LINC01678
MBOAT7	5.04e-09	0.283607	0.269	0.19	0.000128642	CCL2.Mono	MBOAT7
SHMT2	5.51e-09	0.301735	0.31	0.231	0.000140761	CCL2.Mono	SHMT2
SPAG9	6.28e-09	0.275304	0.794	0.702	0.000160348	CCL2.Mono	SPAG9
IL1RN	6.45e-09	0.777634	0.421	0.364	0.000164813	CCL2.Mono	IL1RN
ARMT1	8.3e-09	0.31684	0.505	0.458	0.000211881	CCL2.Mono	ARMT1
TUBA1A1	8.39e-09	0.252209	0.918	0.778	0.000214425	CCL2.Mono	TUBA1A
FCGR2B1	9.43e-09	0.318104	0.421	0.317	0.00024096	CCL2.Mono	FCGR2B
XPOT	1.52e-08	0.329615	0.411	0.352	0.00038915	CCL2.Mono	XPOT
TLE3	2.54e-08	0.382092	0.439	0.391	0.00064945	CCL2.Mono	TLE3
RASSF21	2.65e-08	0.25269	0.353	0.265	0.000677755	CCL2.Mono	RASSF2
PRKAG2	2.75e-08	0.334912	0.402	0.337	0.000701347	CCL2.Mono	PRKAG2
CSF1R1	3.03e-08	0.261155	0.65	0.624	0.000772904	CCL2.Mono	CSF1R
FAM133B	3.89e-08	0.254027	0.716	0.654	0.000993128	CCL2.Mono	FAM133B
R3HDM4	6.16e-08	0.273358	0.321	0.251	0.00157409	CCL2.Mono	R3HDM4
NKIRAS2	7.53e-08	0.314479	0.359	0.297	0.00192214	CCL2.Mono	NKIRAS2
DOCK5	1.17e-07	0.302568	0.329	0.257	0.00299515	CCL2.Mono	DOCK5
EREG1	1.2e-07	0.594927	0.37	0.303	0.00307684	CCL2.Mono	EREG
PDLIM7	1.3e-07	0.314417	0.447	0.398	0.003314	CCL2.Mono	PDLIM7
DUSP10	1.3e-07	0.317437	0.293	0.221	0.00333007	CCL2.Mono	DUSP10
N4BP2	1.39e-07	0.293114	0.385	0.317	0.00355556	CCL2.Mono	N4BP2
TUG1	1.4e-07	0.295801	0.385	0.324	0.00358192	CCL2.Mono	TUG1
NCOA3	1.56e-07	0.286455	0.473	0.43	0.00398971	CCL2.Mono	NCOA3
NFKB1	1.58e-07	0.318388	0.538	0.516	0.00403635	CCL2.Mono	NFKB1
PLAU	1.59e-07	0.268171	0.55	0.502	0.00405131	CCL2.Mono	PLAU
LMNB1	1.67e-07	0.277097	0.254	0.183	0.00427119	CCL2.Mono	LMNB1
SLFN5	1.75e-07	0.333907	0.579	0.554	0.00447464	CCL2.Mono	SLFN5
ITGA5	1.76e-07	0.322536	0.52	0.495	0.00448813	CCL2.Mono	ITGA5
CARD191	1.93e-07	0.302722	0.385	0.325	0.00493548	CCL2.Mono	CARD19
TAF7	1.97e-07	0.270604	0.542	0.492	0.00503111	CCL2.Mono	TAF7
TNFRSF12A	2.05e-07	0.294936	0.258	0.187	0.00524372	CCL2.Mono	TNFRSF12A
TNFSF101	2.08e-07	0.314789	0.684	0.634	0.00531601	CCL2.Mono	TNFSF10
KLF21	2.13e-07	0.330318	0.656	0.557	0.00544901	CCL2.Mono	KLF2
TM6SF1	2.82e-07	0.278249	0.536	0.508	0.00720918	CCL2.Mono	TM6SF1
ZNF385A	3.24e-07	0.330713	0.443	0.399	0.00827703	CCL2.Mono	ZNF385A
YARS	3.91e-07	0.31256	0.434	0.393	0.00998912	CCL2.Mono	YARS
BCAT11	4.81e-07	0.305294	0.471	0.413	0.0122754	CCL2.Mono	BCAT1
JOSD1	5.33e-07	0.268444	0.492	0.456	0.0136082	CCL2.Mono	JOSD1
PREX1	6.54e-07	0.291613	0.499	0.472	0.0166922	CCL2.Mono	PREX1
LPGAT1	9.53e-07	0.273528	0.505	0.479	0.0243412	CCL2.Mono	LPGAT1
ARL5A	1.03e-06	0.267912	0.821	0.746	0.0261866	CCL2.Mono	ARL5A
CALHM61	1.35e-06	0.268655	0.436	0.388	0.0345446	CCL2.Mono	CALHM6
CCR51	1.45e-06	0.2659	0.258	0.19	0.0369223	CCL2.Mono	CCR5
DENND11	1.58e-06	0.308666	0.361	0.308	0.0403755	CCL2.Mono	DENND11
CLEC4E	2.48e-06	0.263141	0.378	0.31	0.0634511	CCL2.Mono	CLEC4E
NPC1	3.08e-06	0.371332	0.441	0.407	0.07856	CCL2.Mono	NPC1
HIVEP3	3.22e-06	0.282123	0.267	0.208	0.0823266	CCL2.Mono	HIVEP3
MOB1B	3.59e-06	0.27759	0.428	0.394	0.0918223	CCL2.Mono	MOB1B
TRIM56	3.72e-06	0.295891	0.436	0.402	0.0950982	CCL2.Mono	TRIM56
DOCK4	4.92e-06	0.266579	0.376	0.323	0.125661	CCL2.Mono	DOCK4
SAMSN1	5.03e-06	0.327317	0.49	0.453	0.128522	CCL2.Mono	SAMSN1
NUP62	5.36e-06	0.312617	0.421	0.394	0.136926	CCL2.Mono	NUP62
TRPS11	6.84e-06	0.259779	0.492	0.461	0.174808	CCL2.Mono	TRPS1
IL1RAP	6.97e-06	0.319071	0.409	0.375	0.177989	CCL2.Mono	IL1RAP
NCOR2	7.08e-06	0.333314	0.49	0.483	0.180897	CCL2.Mono	NCOR2
HIST2H2AC	9.18e-06	0.278642	0.366	0.317	0.234478	CCL2.Mono	HIST2H2AC
RNF41	9.75e-06	0.279147	0.376	0.333	0.248919	CCL2.Mono	RNF41
ORAI2	1.07e-05	0.27872	0.43	0.398	0.272479	CCL2.Mono	ORAI2
KCNQ1OT1	1.18e-05	0.319244	0.265	0.207	0.301908	CCL2.Mono	KCNQ1OT1
MEF2C1	1.4e-05	0.277812	0.413	0.363	0.35859	CCL2.Mono	MEF2C
MAP3K20	1.53e-05	0.285231	0.314	0.261	0.389665	CCL2.Mono	MAP3K20
BASP11	1.59e-05	0.357249	0.363	0.308	0.406548	CCL2.Mono	BASP1
AREG1	1.7e-05	0.525674	0.264	0.198	0.435098	CCL2.Mono	AREG
RAB27A	2.23e-05	0.291331	0.363	0.325	0.570457	CCL2.Mono	RAB27A
LYL1	2.51e-05	0.274075	0.402	0.373	0.642234	CCL2.Mono	LYL1
TAGAP	3.15e-05	0.284169	0.387	0.346	0.803396	CCL2.Mono	TAGAP
EPB41L4A-AS1	3.68e-05	0.279878	0.346	0.306	0.940287	CCL2.Mono	EPB41L4A-AS1
LFNG	4.42e-05	0.255017	0.421	0.386	1	CCL2.Mono	LFNG
DAZAP1	4.74e-05	0.261274	0.43	0.412	1	CCL2.Mono	DAZAP1
TGIF1	5.16e-05	0.274517	0.544	0.539	1	CCL2.Mono	TGIF1
SERTAD2	5.8e-05	0.278163	0.473	0.467	1	CCL2.Mono	SERTAD2
PIM3	8.43e-05	0.298534	0.422	0.398	1	CCL2.Mono	PIM3
ATXN1	0.000117458	0.277383	0.544	0.565	1	CCL2.Mono	ATXN1
NSMAF	0.000122114	0.25048	0.398	0.372	1	CCL2.Mono	NSMAF
LBR	0.000130685	0.251821	0.43	0.419	1	CCL2.Mono	LBR
RGS2	0.000132231	0.437959	0.417	0.389	1	CCL2.Mono	RGS2
GARS	0.000134341	0.292972	0.467	0.458	1	CCL2.Mono	GARS
CPD	0.000213634	0.28594	0.398	0.377	1	CCL2.Mono	CPD
RIPK2	0.000337849	0.257827	0.396	0.38	1	CCL2.Mono	RIPK2
CCRL2	0.000347087	0.297942	0.31	0.28	1	CCL2.Mono	CCRL2
IER5L	0.000347093	0.271462	0.348	0.311	1	CCL2.Mono	IER5L
RASSF5	0.000424456	0.25347	0.452	0.439	1	CCL2.Mono	RASSF5
ZNF791	0.000461166	0.291525	0.35	0.326	1	CCL2.Mono	ZNF791
SCO2	0.000481277	0.254471	0.402	0.387	1	CCL2.Mono	SCO2
SLC4A7	0.000484544	0.267402	0.376	0.345	1	CCL2.Mono	SLC4A7
ISG151	0.000712426	0.302146	0.933	0.884	1	CCL2.Mono	ISG15
ANKRD281	0.00102644	0.279521	0.465	0.465	1	CCL2.Mono	ANKRD28
KDM6B	0.00199181	0.278377	0.376	0.367	1	CCL2.Mono	KDM6B
VASH1	0.00200865	0.253572	0.361	0.346	1	CCL2.Mono	VASH1
SAP30	0.00226556	0.257468	0.383	0.368	1	CCL2.Mono	SAP30
PHLDA2	0.00540922	0.329316	0.299	0.279	1	CCL2.Mono	PHLDA2
PPBP	0	4.07973	0.494	0.058	0	CXCL5.Mono	PPBP
CXCL5	0	3.91917	0.979	0.163	0	CXCL5.Mono	CXCL5
FN11	6.55e-238	1.47643	0.998	0.951	1.67e-233	CXCL5.Mono	FN1
C1QB1	5.13e-152	0.837031	1	0.996	1.31e-147	CXCL5.Mono	C1QB
SPOCD1	6.7e-143	0.734235	0.517	0.172	1.71e-138	CXCL5.Mono	SPOCD1
MSR1	4.67e-131	0.785562	0.995	0.993	1.19e-126	CXCL5.Mono	MSR1
GCHFR1	1.33e-123	0.770454	1	0.992	3.4e-119	CXCL5.Mono	GCHFR
PAQR5	2.96e-118	0.527827	0.4	0.121	7.55e-114	CXCL5.Mono	PAQR5
LINC02345	1.93e-112	0.711669	0.718	0.354	4.92e-108	CXCL5.Mono	LINC02345
FBP11	9.11e-108	0.719817	1	0.998	2.33e-103	CXCL5.Mono	FBP1
TMSB4X	5.8e-101	0.381135	1	1	1.48e-96	CXCL5.Mono	TMSB4X
GLIPR21	3.73e-89	0.518949	0.995	0.992	9.52e-85	CXCL5.Mono	GLIPR2
MIR3945HG	1.17e-88	0.734342	0.612	0.3	2.98e-84	CXCL5.Mono	MIR3945HG
CXCL3	2.95e-88	0.695606	0.856	0.594	7.54e-84	CXCL5.Mono	CXCL3
FTL	1.25e-86	0.432228	1	1	3.18e-82	CXCL5.Mono	FTL
SEPTIN111	1.37e-82	0.515072	0.985	0.956	3.49e-78	CXCL5.Mono	SEPTIN11
ABCG2	1.23e-81	0.482254	0.485	0.205	3.13e-77	CXCL5.Mono	ABCG2
PDLIM11	1.47e-80	0.603779	0.943	0.87	3.76e-76	CXCL5.Mono	PDLIM1
CCL18	2.55e-80	0.892265	0.951	0.885	6.52e-76	CXCL5.Mono	CCL18
CCL23	5.19e-77	0.893996	0.629	0.342	1.33e-72	CXCL5.Mono	CCL23
FABP5	4.55e-75	0.438084	0.999	0.999	1.16e-70	CXCL5.Mono	FABP5
C1QA1	1.74e-74	0.508971	1	0.996	4.43e-70	CXCL5.Mono	C1QA
RMDN3	4.26e-74	0.571793	0.933	0.857	1.09e-69	CXCL5.Mono	RMDN3
AQP31	1.58e-73	0.631138	0.92	0.817	4.02e-69	CXCL5.Mono	AQP3
C1QC1	2.59e-73	0.545951	1	0.995	6.63e-69	CXCL5.Mono	C1QC
ADAM10	2.72e-72	0.539886	0.952	0.883	6.95e-68	CXCL5.Mono	ADAM10
GYPC2	5.32e-72	0.465055	0.982	0.946	1.36e-67	CXCL5.Mono	GYPC
CD521	1.29e-71	0.528737	1	0.993	3.31e-67	CXCL5.Mono	CD52
NCEH1	3.52e-71	0.470426	0.986	0.981	8.99e-67	CXCL5.Mono	NCEH1
APIP1	1.33e-70	0.510165	0.967	0.923	3.4e-66	CXCL5.Mono	APIP
GLDN1	1.96e-70	0.573904	0.872	0.741	5.01e-66	CXCL5.Mono	GLDN
FFAR41	3.72e-70	0.523418	0.863	0.688	9.5e-66	CXCL5.Mono	FFAR4
GSN	7.74e-70	0.670022	0.974	0.921	1.98e-65	CXCL5.Mono	GSN
FTH1	3.18e-69	0.336471	1	1	8.12e-65	CXCL5.Mono	FTH1
MARCO2	1.09e-68	0.476287	1	0.998	2.78e-64	CXCL5.Mono	MARCO
FABP41	1.8e-68	0.753495	0.993	0.986	4.59e-64	CXCL5.Mono	FABP4
LPL1	2.07e-68	0.648176	0.95	0.887	5.29e-64	CXCL5.Mono	LPL
PDGFD1	2.81e-68	0.456648	0.423	0.18	7.17e-64	CXCL5.Mono	PDGFD
ALOX5AP2	3.92e-68	0.471637	1	0.989	1e-63	CXCL5.Mono	ALOX5AP
AL365361.11	9.46e-67	0.476693	0.661	0.366	2.42e-62	CXCL5.Mono	AL365361.1
CRIP11	1.09e-66	0.481007	1	0.998	2.77e-62	CXCL5.Mono	CRIP1
SNX2	2.6e-66	0.474767	0.993	0.983	6.64e-62	CXCL5.Mono	SNX2
MYL6	5.02e-66	0.362133	1	1	1.28e-61	CXCL5.Mono	MYL6
MRC1	8.68e-66	0.440608	1	0.993	2.22e-61	CXCL5.Mono	MRC1
CORO2A	3.32e-65	0.477544	0.695	0.411	8.49e-61	CXCL5.Mono	CORO2A
SERPINA11	4.46e-65	0.424989	0.999	0.993	1.14e-60	CXCL5.Mono	SERPINA1
ANXA5	1.76e-64	0.322983	1	1	4.49e-60	CXCL5.Mono	ANXA5
COLEC121	1.51e-56	0.534235	0.885	0.781	3.86e-52	CXCL5.Mono	COLEC12
PCOLCE2	8.87e-56	0.743111	0.769	0.706	2.27e-51	CXCL5.Mono	PCOLCE2
RGCC1	3.78e-54	0.431569	0.995	0.975	9.65e-50	CXCL5.Mono	RGCC
S100A4	4.54e-53	0.392987	1	0.999	1.16e-48	CXCL5.Mono	S100A4
DUSP61	2.29e-52	0.474976	0.785	0.537	5.85e-48	CXCL5.Mono	DUSP6
IL7R1	4.76e-52	0.529251	0.962	0.892	1.21e-47	CXCL5.Mono	IL7R
MCEMP12	7.68e-52	0.397176	0.999	0.971	1.96e-47	CXCL5.Mono	MCEMP1
ATP10A	3.78e-51	0.335735	0.395	0.183	9.64e-47	CXCL5.Mono	ATP10A
ITGB8	5.85e-51	0.477755	0.406	0.196	1.5e-46	CXCL5.Mono	ITGB8
PHLDA31	1.26e-49	0.419137	0.879	0.784	3.23e-45	CXCL5.Mono	PHLDA3
SECTM1	2.14e-49	0.376598	0.484	0.253	5.47e-45	CXCL5.Mono	SECTM1
PROS1	3.11e-49	0.385865	0.544	0.303	7.93e-45	CXCL5.Mono	PROS1
VSIG42	8.63e-49	0.386223	0.992	0.975	2.21e-44	CXCL5.Mono	VSIG4
MMP19	1.26e-48	0.391248	0.484	0.258	3.23e-44	CXCL5.Mono	MMP19
EFHD2	2.52e-48	0.327521	0.994	0.989	6.44e-44	CXCL5.Mono	EFHD2
ATP1B11	5.6e-48	0.382052	0.958	0.921	1.43e-43	CXCL5.Mono	ATP1B1
MT-ND5	6.66e-48	0.374972	0.999	0.998	1.7e-43	CXCL5.Mono	MT-ND5
MYO6	9.79e-48	0.347903	0.455	0.233	2.5e-43	CXCL5.Mono	MYO6
CD276	1.82e-47	0.355056	0.577	0.331	4.64e-43	CXCL5.Mono	CD276
PPARG2	3.07e-47	0.358474	0.986	0.957	7.84e-43	CXCL5.Mono	PPARG
CDCP1	7.16e-47	0.391449	0.682	0.428	1.83e-42	CXCL5.Mono	CDCP1
B3GNT7	1.83e-46	0.367453	0.58	0.337	4.66e-42	CXCL5.Mono	B3GNT7
SVIL2	2.19e-46	0.374681	0.965	0.906	5.59e-42	CXCL5.Mono	SVIL
MT-CO2	1.02e-45	0.291328	1	1	2.59e-41	CXCL5.Mono	MT-CO2
CYBB	1.15e-45	0.333717	1	0.997	2.95e-41	CXCL5.Mono	CYBB
EVL1	6.98e-45	0.469954	0.88	0.831	1.78e-40	CXCL5.Mono	EVL
PNPLA61	1.47e-44	0.379127	0.94	0.872	3.74e-40	CXCL5.Mono	PNPLA6
MACC1	2.73e-44	0.53212	0.658	0.477	6.96e-40	CXCL5.Mono	MACC1
TREM11	7.98e-44	0.370445	0.993	0.965	2.04e-39	CXCL5.Mono	TREM1
TRPV2	1.71e-43	0.38567	0.861	0.733	4.36e-39	CXCL5.Mono	TRPV2
DHCR24	2.39e-42	0.299149	0.372	0.181	6.11e-38	CXCL5.Mono	DHCR24
FGD5	3.59e-42	0.318702	0.396	0.202	9.17e-38	CXCL5.Mono	FGD5
CTSD	1.46e-41	0.316736	1	1	3.73e-37	CXCL5.Mono	CTSD
RHBDD2	2.69e-41	0.404638	0.778	0.6	6.86e-37	CXCL5.Mono	RHBDD2
CCDC88A	3.25e-41	0.371832	0.993	0.993	8.3e-37	CXCL5.Mono	CCDC88A
PLAAT31	3.5e-41	0.34864	0.948	0.913	8.94e-37	CXCL5.Mono	PLAAT3
CD163	6.28e-41	0.476566	0.936	0.905	1.6e-36	CXCL5.Mono	CD163
TOMM5	8.68e-41	0.334447	0.977	0.972	2.22e-36	CXCL5.Mono	TOMM5
SH3BP51	3.15e-40	0.411966	0.853	0.75	8.04e-36	CXCL5.Mono	SH3BP5
INHBA2	4.33e-40	0.4235	0.919	0.883	1.1e-35	CXCL5.Mono	INHBA
HDDC22	1.83e-39	0.362846	0.903	0.876	4.67e-35	CXCL5.Mono	HDDC2
LTA4H1	6.38e-39	0.324173	1	0.996	1.63e-34	CXCL5.Mono	LTA4H
CXCL2	6.85e-39	0.391144	0.542	0.317	1.75e-34	CXCL5.Mono	CXCL2
HCAR21	1.99e-38	0.331628	0.566	0.333	5.08e-34	CXCL5.Mono	HCAR2
TAGLN21	2.58e-38	0.305219	1	0.998	6.58e-34	CXCL5.Mono	TAGLN2
MT-CYB	3.05e-38	0.326695	0.999	1	7.79e-34	CXCL5.Mono	MT-CYB
UBB1	3.6e-38	0.277132	1	1	9.18e-34	CXCL5.Mono	UBB
CXCL162	2.38e-37	0.285284	0.997	0.996	6.07e-33	CXCL5.Mono	CXCL16
MGST31	2.43e-37	0.268338	1	1	6.21e-33	CXCL5.Mono	MGST3
TCF7L22	1.48e-36	0.309696	0.959	0.904	3.78e-32	CXCL5.Mono	TCF7L2
ENPP4	4.1e-36	0.365894	0.819	0.683	1.05e-31	CXCL5.Mono	ENPP4
TFRC	6.38e-36	0.36045	0.986	0.984	1.63e-31	CXCL5.Mono	TFRC
FAM89A1	1.83e-35	0.352907	0.939	0.872	4.67e-31	CXCL5.Mono	FAM89A
GLRX1	7.21e-35	0.291356	1	0.998	1.84e-30	CXCL5.Mono	GLRX
DECR11	7.27e-35	0.334033	0.968	0.944	1.86e-30	CXCL5.Mono	DECR1
MT-CO1	1.24e-34	0.280955	1	1	3.17e-30	CXCL5.Mono	MT-CO1
FCGR3A	1.29e-34	0.25459	0.999	0.993	3.29e-30	CXCL5.Mono	FCGR3A
EML4	3.42e-34	0.305698	0.991	0.973	8.74e-30	CXCL5.Mono	EML4
SLCO2B1	4.98e-34	0.320591	0.984	0.944	1.27e-29	CXCL5.Mono	SLCO2B1
CDC42BPB	1.97e-33	0.402124	0.79	0.694	5.04e-29	CXCL5.Mono	CDC42BPB
S100A131	2.96e-33	0.39727	0.896	0.856	7.56e-29	CXCL5.Mono	S100A13
POR1	5e-33	0.348713	0.846	0.756	1.28e-28	CXCL5.Mono	POR
SCCPDH	5.33e-33	0.367472	0.877	0.805	1.36e-28	CXCL5.Mono	SCCPDH
SGMS21	8.45e-33	0.352978	0.895	0.792	2.16e-28	CXCL5.Mono	SGMS2
GCNT1	2.24e-32	0.308096	0.592	0.372	5.73e-28	CXCL5.Mono	GCNT1
PPIC	9.79e-32	0.411861	0.54	0.37	2.5e-27	CXCL5.Mono	PPIC
LDHB	1.58e-31	0.367871	0.941	0.93	4.04e-27	CXCL5.Mono	LDHB
GNG10	1.69e-31	0.25839	0.994	0.986	4.31e-27	CXCL5.Mono	GNG10
GPD1	3.71e-31	0.535701	0.578	0.467	9.48e-27	CXCL5.Mono	GPD1
AC026369.31	3.83e-31	0.367094	0.871	0.849	9.77e-27	CXCL5.Mono	AC026369.3
CSF1	1.25e-30	0.311459	0.262	0.125	3.2e-26	CXCL5.Mono	CSF1
PTMS	1.95e-30	0.273017	0.993	0.98	4.99e-26	CXCL5.Mono	PTMS
CTNNB1	2.16e-30	0.319883	0.952	0.938	5.53e-26	CXCL5.Mono	CTNNB1
NMB	2.33e-30	0.559517	0.639	0.538	5.96e-26	CXCL5.Mono	NMB
DOK2	2.48e-30	0.270017	0.982	0.944	6.33e-26	CXCL5.Mono	DOK2
PCED1B	3.34e-30	0.266945	0.455	0.274	8.54e-26	CXCL5.Mono	PCED1B
ALDH21	1.42e-29	0.261991	1	0.997	3.62e-25	CXCL5.Mono	ALDH2
LMNA1	1.77e-29	0.294585	0.977	0.946	4.52e-25	CXCL5.Mono	LMNA
PARAL11	1.91e-29	0.312892	0.844	0.711	4.87e-25	CXCL5.Mono	PARAL1
FLNA	2.46e-29	0.28416	0.985	0.971	6.27e-25	CXCL5.Mono	FLNA
LGALS3BP1	2.71e-29	0.305057	0.941	0.921	6.92e-25	CXCL5.Mono	LGALS3BP
ALOX51	3.14e-29	0.269563	0.99	0.977	8.02e-25	CXCL5.Mono	ALOX5
MAN1A1	4.68e-29	0.295015	0.941	0.883	1.19e-24	CXCL5.Mono	MAN1A1
HPGD	9.88e-29	0.439837	0.652	0.551	2.52e-24	CXCL5.Mono	HPGD
DENND4C	1.5e-28	0.327603	0.645	0.453	3.82e-24	CXCL5.Mono	DENND4C
NUCB1	1.77e-28	0.276006	0.941	0.917	4.52e-24	CXCL5.Mono	NUCB1
TNIK	2.29e-28	0.260909	0.338	0.184	5.84e-24	CXCL5.Mono	TNIK
ARHGEF281	3.06e-28	0.330682	0.576	0.396	7.81e-24	CXCL5.Mono	ARHGEF28
S1PR41	3.4e-28	0.315646	0.691	0.503	8.67e-24	CXCL5.Mono	S1PR4
ARL4A2	3.43e-28	0.354542	0.893	0.827	8.77e-24	CXCL5.Mono	ARL4A
MLPH	5.16e-28	0.373583	0.372	0.227	1.32e-23	CXCL5.Mono	MLPH
NCLN	6.74e-28	0.27685	0.56	0.369	1.72e-23	CXCL5.Mono	NCLN
CD47	7.02e-28	0.322863	0.971	0.958	1.79e-23	CXCL5.Mono	CD47
SELENON	1.11e-27	0.320499	0.462	0.296	2.84e-23	CXCL5.Mono	SELENON
ORAI1	1.21e-27	0.345779	0.733	0.547	3.08e-23	CXCL5.Mono	ORAI1
TBC1D10C1	1.93e-27	0.284628	0.595	0.405	4.93e-23	CXCL5.Mono	TBC1D10C
PLBD1	1.98e-27	0.299597	0.973	0.96	5.06e-23	CXCL5.Mono	PLBD1
DST	1.99e-27	0.293201	0.922	0.886	5.08e-23	CXCL5.Mono	DST
MYADM2	2.52e-27	0.335155	0.965	0.925	6.42e-23	CXCL5.Mono	MYADM
EPAS1	3.28e-27	0.285656	0.729	0.539	8.38e-23	CXCL5.Mono	EPAS1
LIPA	3.38e-27	0.283403	0.95	0.907	8.62e-23	CXCL5.Mono	LIPA
ID2	5.57e-27	0.372689	0.947	0.909	1.42e-22	CXCL5.Mono	ID2
CYB5A	8.43e-27	0.295585	0.919	0.899	2.15e-22	CXCL5.Mono	CYB5A
MINK1	1.14e-26	0.265606	0.596	0.402	2.9e-22	CXCL5.Mono	MINK1
CYB5R3	2.62e-26	0.272256	0.916	0.879	6.7e-22	CXCL5.Mono	CYB5R3
SGMS1	4.4e-26	0.254954	0.592	0.398	1.12e-21	CXCL5.Mono	SGMS1
NPTN	5.17e-26	0.264012	0.957	0.927	1.32e-21	CXCL5.Mono	NPTN
RASGRP22	7.93e-26	0.273504	0.691	0.49	2.03e-21	CXCL5.Mono	RASGRP2
SLFN11	1.1e-25	0.277205	0.929	0.865	2.8e-21	CXCL5.Mono	SLFN11
CCND31	1.22e-25	0.306417	0.768	0.645	3.12e-21	CXCL5.Mono	CCND3
SEPTIN9	1.33e-25	0.295431	0.764	0.613	3.4e-21	CXCL5.Mono	SEPTIN9
TSPAN3	1.4e-25	0.39641	0.745	0.682	3.56e-21	CXCL5.Mono	TSPAN3
CLDN7	1.74e-25	0.261445	0.594	0.4	4.44e-21	CXCL5.Mono	CLDN7
SPINT1	1.89e-25	0.279241	0.468	0.301	4.82e-21	CXCL5.Mono	SPINT1
OSBPL11	2.15e-25	0.275705	0.973	0.957	5.48e-21	CXCL5.Mono	OSBPL11
GPRIN3	3.61e-25	0.289089	0.951	0.93	9.22e-21	CXCL5.Mono	GPRIN3
SPN1	7.55e-25	0.273989	0.945	0.929	1.93e-20	CXCL5.Mono	SPN
ETHE1	1.17e-24	0.293776	0.896	0.856	2.99e-20	CXCL5.Mono	ETHE1
STXBP21	1.23e-24	0.337374	0.966	0.935	3.13e-20	CXCL5.Mono	STXBP2
RBMS2	1.53e-24	0.251665	0.588	0.397	3.9e-20	CXCL5.Mono	RBMS2
RASA1	2.14e-24	0.270078	0.588	0.407	5.46e-20	CXCL5.Mono	RASA1
VASP	2.51e-24	0.254346	0.988	0.968	6.42e-20	CXCL5.Mono	VASP
NOP10	3.06e-24	0.258378	1	0.999	7.81e-20	CXCL5.Mono	NOP10
PECAM1	5.86e-24	0.255543	0.963	0.949	1.5e-19	CXCL5.Mono	PECAM1
MME1	1.35e-23	0.45757	0.793	0.778	3.45e-19	CXCL5.Mono	MME
ADAM17	1.79e-23	0.266093	0.894	0.83	4.56e-19	CXCL5.Mono	ADAM17
CDC37	2.13e-23	0.255962	0.95	0.926	5.43e-19	CXCL5.Mono	CDC37
ANXA11	4.1e-23	0.264833	0.948	0.926	1.05e-18	CXCL5.Mono	ANXA11
ACKR32	5.21e-23	0.328593	0.477	0.324	1.33e-18	CXCL5.Mono	ACKR3
ISOC2	6.45e-23	0.281696	0.727	0.56	1.65e-18	CXCL5.Mono	ISOC2
AGRP2	1.28e-22	0.337049	0.784	0.68	3.28e-18	CXCL5.Mono	AGRP
CKS1B	1.71e-22	0.289845	0.626	0.463	4.37e-18	CXCL5.Mono	CKS1B
FLVCR2	1.89e-22	0.26553	0.706	0.542	4.83e-18	CXCL5.Mono	FLVCR2
CAMK2D	2.46e-22	0.258893	0.481	0.321	6.28e-18	CXCL5.Mono	CAMK2D
RAC2	4.1e-22	0.254209	0.907	0.855	1.05e-17	CXCL5.Mono	RAC2
VAT1	9.09e-22	0.264435	0.911	0.867	2.32e-17	CXCL5.Mono	VAT1
LYAR	1.42e-21	0.377782	0.853	0.815	3.62e-17	CXCL5.Mono	LYAR
VMO11	2.79e-21	0.332226	0.747	0.654	7.11e-17	CXCL5.Mono	VMO1
RHOB	3e-21	0.296527	0.805	0.726	7.66e-17	CXCL5.Mono	RHOB
AGFG1	3.67e-21	0.317422	0.824	0.767	9.38e-17	CXCL5.Mono	AGFG1
FRMD4A	4.45e-21	0.252006	0.755	0.577	1.14e-16	CXCL5.Mono	FRMD4A
TLR8	1.31e-20	0.252625	0.604	0.431	3.35e-16	CXCL5.Mono	TLR8
ANPEP1	1.07e-19	0.294513	0.751	0.603	2.74e-15	CXCL5.Mono	ANPEP
KAT8	1.39e-19	0.258265	0.715	0.564	3.55e-15	CXCL5.Mono	KAT8
MSMO1	1.8e-19	0.291684	0.402	0.262	4.61e-15	CXCL5.Mono	MSMO1
NUS1	2.47e-19	0.250619	0.725	0.559	6.31e-15	CXCL5.Mono	NUS1
APOBR	2.77e-19	0.250144	0.671	0.496	7.06e-15	CXCL5.Mono	APOBR
BID	3.92e-19	0.252893	0.897	0.878	1e-14	CXCL5.Mono	BID
AKIRIN2	4.62e-19	0.264352	0.87	0.814	1.18e-14	CXCL5.Mono	AKIRIN2
FHL11	1.08e-18	0.264941	0.653	0.535	2.75e-14	CXCL5.Mono	FHL1
C20orf27	1.92e-18	0.252985	0.721	0.589	4.91e-14	CXCL5.Mono	C20orf27
ARRDC4	4.35e-18	0.270786	0.824	0.73	1.11e-13	CXCL5.Mono	ARRDC4
ACOT7	7.52e-18	0.25659	0.508	0.37	1.92e-13	CXCL5.Mono	ACOT7
DEFB1	1.53e-16	0.263982	0.351	0.226	3.91e-12	CXCL5.Mono	DEFB1
IL3RA1	1.45e-15	0.252033	0.674	0.533	3.7e-11	CXCL5.Mono	IL3RA
CYP51A1	5.12e-14	0.259454	0.617	0.471	1.31e-09	CXCL5.Mono	CYP51A1
IGFBP21	5.19e-13	0.583434	0.393	0.304	1.33e-08	CXCL5.Mono	IGFBP2
ACO1	9.36e-13	0.255744	0.702	0.678	2.39e-08	CXCL5.Mono	ACO1
RBP4	1.15e-09	0.501944	0.472	0.412	2.94e-05	CXCL5.Mono	RBP4
HLA-DRB52	5.94e-07	0.388268	0.922	0.908	0.0151766	CXCL5.Mono	HLA-DRB5
AKR1C3	4.44e-06	0.251639	0.434	0.391	0.11342	CXCL5.Mono	AKR1C3
LGALS21	9.22e-282	2.41239	0.709	0.1	2.35e-277	CXCL9.Mono	LGALS2
SLAMF7	2.18e-227	1.52792	0.583	0.077	5.56e-223	CXCL9.Mono	SLAMF7
CXCL9	5.87e-215	3.58131	0.447	0.047	1.5e-210	CXCL9.Mono	CXCL9
MARCKSL1	2.34e-172	1.29568	0.396	0.045	5.99e-168	CXCL9.Mono	MARCKSL1
CD481	5.03e-159	1.58022	0.826	0.246	1.29e-154	CXCL9.Mono	CD48
CXCL10	4.01e-158	3.77752	0.393	0.05	1.02e-153	CXCL9.Mono	CXCL10
C15orf481	7.35e-145	2.57068	0.97	0.531	1.88e-140	CXCL9.Mono	C15orf48
IL4I1	5.16e-138	1.22342	0.634	0.15	1.32e-133	CXCL9.Mono	IL4I1
SOD2	1.71e-104	2.1345	0.991	0.857	4.35e-100	CXCL9.Mono	SOD2
PLXNC12	8.96e-95	1.04396	0.661	0.21	2.29e-90	CXCL9.Mono	PLXNC1
FGL22	1.26e-93	1.7487	0.868	0.498	3.21e-89	CXCL9.Mono	FGL2
CALHM62	2.06e-90	1.74655	0.775	0.378	5.25e-86	CXCL9.Mono	CALHM6
BIRC3	2.35e-88	0.950412	0.399	0.086	6.01e-84	CXCL9.Mono	BIRC3
FYB11	8.1e-86	1.21591	0.991	0.876	2.07e-81	CXCL9.Mono	FYB1
G0S21	1.18e-84	2.37226	0.384	0.081	3.02e-80	CXCL9.Mono	G0S2
ANKRD22	2.75e-84	1.1327	0.405	0.092	7.03e-80	CXCL9.Mono	ANKRD22
SDS1	4.75e-82	1.06643	0.417	0.093	1.21e-77	CXCL9.Mono	SDS
MARCKS1	1.27e-80	1.49322	0.802	0.358	3.24e-76	CXCL9.Mono	MARCKS
CLEC10A1	1.47e-80	1.05377	0.514	0.142	3.76e-76	CXCL9.Mono	CLEC10A
PLA2G71	1.21e-77	1.28279	0.694	0.27	3.08e-73	CXCL9.Mono	PLA2G7
CTSH1	1.33e-77	0.890384	0.997	0.986	3.41e-73	CXCL9.Mono	CTSH
CXCR41	4.49e-77	1.28402	0.715	0.302	1.15e-72	CXCL9.Mono	CXCR4
PALM2-AKAP2	1.45e-75	0.891286	0.438	0.116	3.69e-71	CXCL9.Mono	PALM2-AKAP2
MREG	3.69e-71	0.707772	0.357	0.081	9.44e-67	CXCL9.Mono	MREG
SERPINB91	4.73e-71	1.27982	0.492	0.155	1.21e-66	CXCL9.Mono	SERPINB9
PEA152	5.04e-70	1.05811	0.82	0.467	1.29e-65	CXCL9.Mono	PEA15
PLEKHO11	8.88e-69	1.08097	0.85	0.518	2.27e-64	CXCL9.Mono	PLEKHO1
STAT1	2.04e-67	1.25798	0.967	0.883	5.2e-63	CXCL9.Mono	STAT1
AMPD3	1.46e-64	0.454793	0.3	0.063	3.72e-60	CXCL9.Mono	AMPD3
ATF51	1.44e-61	0.916651	0.595	0.243	3.68e-57	CXCL9.Mono	ATF5
SPHK11	3.9e-61	0.487876	0.306	0.067	9.97e-57	CXCL9.Mono	SPHK1
SEMA4A	1.47e-59	0.568083	0.441	0.135	3.75e-55	CXCL9.Mono	SEMA4A
GBP5	9.28e-58	1.53436	0.498	0.189	2.37e-53	CXCL9.Mono	GBP5
TMEM176B	1.24e-56	0.959285	0.934	0.692	3.17e-52	CXCL9.Mono	TMEM176B
WARS1	2.61e-55	1.30892	0.88	0.656	6.67e-51	CXCL9.Mono	WARS
TYMP2	2.05e-54	0.810644	0.991	0.978	5.23e-50	CXCL9.Mono	TYMP
VAMP5	1.14e-53	1.34361	0.742	0.426	2.91e-49	CXCL9.Mono	VAMP5
GCH1	1.84e-53	0.630443	0.324	0.085	4.7e-49	CXCL9.Mono	GCH1
PTPRE2	4.04e-53	1.02839	0.778	0.466	1.03e-48	CXCL9.Mono	PTPRE
RGS102	5.25e-53	0.848013	0.985	0.905	1.34e-48	CXCL9.Mono	RGS10
SGK12	1.22e-52	1.06421	0.88	0.619	3.12e-48	CXCL9.Mono	SGK1
NAP1L11	2.13e-52	0.834569	1	0.994	5.44e-48	CXCL9.Mono	NAP1L1
LILRB41	2.66e-52	0.908409	0.685	0.347	6.8e-48	CXCL9.Mono	LILRB4
RALA2	3.88e-52	1.07963	0.856	0.645	9.92e-48	CXCL9.Mono	RALA
SLAMF8	4e-52	0.775415	0.817	0.511	1.02e-47	CXCL9.Mono	SLAMF8
SERPINF1	6.15e-52	0.903752	0.441	0.152	1.57e-47	CXCL9.Mono	SERPINF1
C17orf491	9.79e-52	0.809594	0.859	0.605	2.5e-47	CXCL9.Mono	C17orf49
GPR1832	3.79e-50	0.987662	0.498	0.184	9.68e-46	CXCL9.Mono	GPR183
GBP4	1.86e-49	1.35362	0.595	0.312	4.76e-45	CXCL9.Mono	GBP4
TNFSF13B	7.76e-49	0.935008	0.952	0.901	1.98e-44	CXCL9.Mono	TNFSF13B
PPA1	2.52e-48	1.22648	0.907	0.779	6.44e-44	CXCL9.Mono	PPA1
PRDM1	2.92e-47	0.58634	0.324	0.091	7.46e-43	CXCL9.Mono	PRDM1
PRKCB2	3.1e-47	0.856298	0.607	0.292	7.92e-43	CXCL9.Mono	PRKCB
TMEM176A	1.25e-46	1.00938	0.805	0.533	3.18e-42	CXCL9.Mono	TMEM176A
PTMA1	1.54e-46	0.467971	1	1	3.93e-42	CXCL9.Mono	PTMA
MTHFD22	3.45e-45	0.83527	0.838	0.589	8.82e-41	CXCL9.Mono	MTHFD2
MALAT12	3.8e-44	0.683231	1	0.999	9.71e-40	CXCL9.Mono	MALAT1
LIMD22	3.13e-43	0.615079	0.453	0.17	7.99e-39	CXCL9.Mono	LIMD2
FPR32	1.38e-42	0.77322	0.919	0.716	3.52e-38	CXCL9.Mono	FPR3
RPL101	4.43e-42	0.457494	1	1	1.13e-37	CXCL9.Mono	RPL10
PSTPIP21	7.36e-42	0.792003	0.426	0.168	1.88e-37	CXCL9.Mono	PSTPIP2
SAT11	9.12e-42	0.750608	1	0.997	2.33e-37	CXCL9.Mono	SAT1
GPR84	5.36e-41	0.390769	0.264	0.069	1.37e-36	CXCL9.Mono	GPR84
HIF1A1	5.71e-41	0.946762	0.805	0.587	1.46e-36	CXCL9.Mono	HIF1A
ITGAX1	2.88e-40	0.758436	0.802	0.515	7.35e-36	CXCL9.Mono	ITGAX
PSME2	3.98e-40	0.854188	0.997	0.974	1.02e-35	CXCL9.Mono	PSME2
PPIF1	2.83e-39	0.851766	0.652	0.364	7.23e-35	CXCL9.Mono	PPIF
CD841	4.45e-39	0.766378	0.802	0.527	1.14e-34	CXCL9.Mono	CD84
HLA-DMB	4.84e-39	0.644942	0.997	0.976	1.24e-34	CXCL9.Mono	HLA-DMB
TNFRSF1B1	6.23e-39	0.812336	0.73	0.451	1.59e-34	CXCL9.Mono	TNFRSF1B
DOCK41	1.16e-38	0.671398	0.613	0.316	2.95e-34	CXCL9.Mono	DOCK4
TFEB	1.83e-38	0.388687	0.339	0.111	4.67e-34	CXCL9.Mono	TFEB
IER32	2.25e-38	1.05181	0.712	0.449	5.75e-34	CXCL9.Mono	IER3
SLC39A8	2.25e-38	0.931836	0.381	0.144	5.76e-34	CXCL9.Mono	SLC39A8
MT2A	1.14e-37	0.846472	0.829	0.612	2.92e-33	CXCL9.Mono	MT2A
PLAAT4	1.3e-37	1.04237	0.583	0.325	3.32e-33	CXCL9.Mono	PLAAT4
SLC20A11	1.36e-37	0.613405	0.514	0.243	3.48e-33	CXCL9.Mono	SLC20A1
HRH21	7.07e-37	0.449249	0.297	0.092	1.8e-32	CXCL9.Mono	HRH2
ADAM81	7.19e-37	0.449836	0.309	0.097	1.84e-32	CXCL9.Mono	ADAM8
LIMS12	9.28e-37	0.616853	0.985	0.919	2.37e-32	CXCL9.Mono	LIMS1
PNRC11	1.02e-36	0.91921	0.988	0.931	2.61e-32	CXCL9.Mono	PNRC1
ADGRE21	1.21e-36	0.657253	0.505	0.233	3.1e-32	CXCL9.Mono	ADGRE2
TAP1	1.24e-36	0.826491	0.652	0.403	3.18e-32	CXCL9.Mono	TAP1
LAP3	3.56e-36	0.698086	0.991	0.966	9.1e-32	CXCL9.Mono	LAP3
CFLAR1	9.79e-36	0.714236	0.907	0.754	2.5e-31	CXCL9.Mono	CFLAR
NFKB11	1.45e-35	0.80194	0.736	0.51	3.7e-31	CXCL9.Mono	NFKB1
RGL1	3.46e-35	0.482382	0.345	0.121	8.84e-31	CXCL9.Mono	RGL1
RPS91	3.84e-35	0.355386	1	1	9.82e-31	CXCL9.Mono	RPS9
RPS27A1	4.7e-35	0.3508	1	1	1.2e-30	CXCL9.Mono	RPS27A
PLEK	4.85e-35	1.11584	0.979	0.943	1.24e-30	CXCL9.Mono	PLEK
NINJ1	4.04e-34	0.787014	0.529	0.259	1.03e-29	CXCL9.Mono	NINJ1
ATOX1	4.93e-34	0.670821	0.991	0.982	1.26e-29	CXCL9.Mono	ATOX1
TMSB10	5.76e-34	0.43473	1	1	1.47e-29	CXCL9.Mono	TMSB10
RPL131	1.1e-33	0.369801	1	1	2.81e-29	CXCL9.Mono	RPL13
IGSF61	1.25e-33	0.76676	0.994	0.976	3.2e-29	CXCL9.Mono	IGSF6
RHOQ	2e-33	0.680627	0.94	0.83	5.12e-29	CXCL9.Mono	RHOQ
TCF4	2.97e-33	0.726635	0.547	0.292	7.58e-29	CXCL9.Mono	TCF4
LCP21	3.46e-33	0.71279	0.826	0.644	8.84e-29	CXCL9.Mono	LCP2
ATP6V1B21	3.51e-33	0.610373	0.964	0.891	8.97e-29	CXCL9.Mono	ATP6V1B2
LRRK2	4.55e-33	0.521388	0.432	0.188	1.16e-28	CXCL9.Mono	LRRK2
SLC1A3	5.32e-33	0.73734	0.529	0.278	1.36e-28	CXCL9.Mono	SLC1A3
ARL4C1	6.46e-33	0.826624	0.676	0.406	1.65e-28	CXCL9.Mono	ARL4C
FNIP21	7.19e-33	0.812088	0.67	0.425	1.84e-28	CXCL9.Mono	FNIP2
RELB	7.65e-33	0.419133	0.291	0.097	1.95e-28	CXCL9.Mono	RELB
RPL181	1.27e-32	0.383386	1	1	3.24e-28	CXCL9.Mono	RPL18
LITAF1	1.52e-32	0.639135	1	0.998	3.88e-28	CXCL9.Mono	LITAF
RASSF22	1.82e-32	0.550963	0.532	0.261	4.66e-28	CXCL9.Mono	RASSF2
VEGFA1	4.18e-32	0.787245	0.423	0.185	1.07e-27	CXCL9.Mono	VEGFA
RGS1	4.29e-32	1.02715	0.571	0.316	1.09e-27	CXCL9.Mono	RGS1
HMGA11	2.21e-31	0.644027	0.745	0.511	5.65e-27	CXCL9.Mono	HMGA1
PSMB9	2.94e-31	0.662948	0.976	0.925	7.5e-27	CXCL9.Mono	PSMB9
RPS111	3.08e-31	0.350404	1	1	7.86e-27	CXCL9.Mono	RPS11
RPS22	4.35e-31	0.374695	1	1	1.11e-26	CXCL9.Mono	RPS2
TNFRSF14	7.37e-31	0.687373	0.673	0.459	1.88e-26	CXCL9.Mono	TNFRSF14
RUNX3	1.05e-30	0.710656	0.342	0.135	2.68e-26	CXCL9.Mono	RUNX3
RPL36A1	1.28e-30	0.43342	1	1	3.27e-26	CXCL9.Mono	RPL36A
RPL35A1	2.62e-30	0.36077	1	1	6.7e-26	CXCL9.Mono	RPL35A
BASP12	3.58e-30	0.748389	0.553	0.303	9.15e-26	CXCL9.Mono	BASP1
SIGLEC10	5.43e-30	0.583136	0.291	0.104	1.39e-25	CXCL9.Mono	SIGLEC10
RPL341	1.12e-29	0.348214	1	1	2.86e-25	CXCL9.Mono	RPL34
FAM49B1	1.38e-29	0.510794	0.967	0.934	3.54e-25	CXCL9.Mono	FAM49B
ZNF267	3.8e-29	0.595637	0.598	0.353	9.71e-25	CXCL9.Mono	ZNF267
PIM31	4.93e-29	0.668789	0.625	0.392	1.26e-24	CXCL9.Mono	PIM3
GABARAP1	7.53e-29	0.366701	1	0.999	1.92e-24	CXCL9.Mono	GABARAP
SUSD6	1.24e-28	0.650621	0.643	0.426	3.17e-24	CXCL9.Mono	SUSD6
RPS3A1	1.52e-28	0.351227	1	1	3.89e-24	CXCL9.Mono	RPS3A
PSAP	1.93e-28	0.442295	1	1	4.92e-24	CXCL9.Mono	PSAP
MAP3K22	3.47e-28	0.499308	0.928	0.812	8.86e-24	CXCL9.Mono	MAP3K2
SLC8A12	8.6e-28	0.525263	0.958	0.865	2.2e-23	CXCL9.Mono	SLC8A1
RPS241	1.56e-27	0.298524	1	1	3.99e-23	CXCL9.Mono	RPS24
VMP11	1.79e-27	0.638558	0.97	0.885	4.57e-23	CXCL9.Mono	VMP1
RASSF4	3.89e-27	0.703124	0.7	0.5	9.93e-23	CXCL9.Mono	RASSF4
LILRB21	9.42e-27	0.62577	0.565	0.335	2.41e-22	CXCL9.Mono	LILRB2
RPL71	2.69e-26	0.341007	1	1	6.88e-22	CXCL9.Mono	RPL7
JAK11	3.08e-26	0.513927	0.961	0.902	7.87e-22	CXCL9.Mono	JAK1
AOAH	3.19e-26	0.588578	0.447	0.232	8.14e-22	CXCL9.Mono	AOAH
KLHL51	4.21e-26	0.448731	0.399	0.183	1.08e-21	CXCL9.Mono	KLHL5
MLLT6	5.17e-26	0.403738	0.318	0.129	1.32e-21	CXCL9.Mono	MLLT6
SQSTM11	5.19e-26	0.545299	0.988	0.934	1.33e-21	CXCL9.Mono	SQSTM1
CST61	6.04e-26	0.414682	0.27	0.095	1.54e-21	CXCL9.Mono	CST6
RPS81	1.44e-25	0.326551	1	1	3.68e-21	CXCL9.Mono	RPS8
NPC2	1.71e-25	0.422447	1	1	4.36e-21	CXCL9.Mono	NPC2
ELK32	2.38e-25	0.515195	0.52	0.286	6.09e-21	CXCL9.Mono	ELK3
TNFAIP3	3e-25	0.879909	0.529	0.326	7.66e-21	CXCL9.Mono	TNFAIP3
RPS281	4.96e-25	0.304168	1	1	1.27e-20	CXCL9.Mono	RPS28
CDKN1A	5.52e-25	0.650941	0.553	0.304	1.41e-20	CXCL9.Mono	CDKN1A
IL6R1	5.74e-25	0.44505	0.459	0.233	1.47e-20	CXCL9.Mono	IL6R
RPS61	7.18e-25	0.312712	1	1	1.83e-20	CXCL9.Mono	RPS6
NEAT12	9.4e-25	0.54149	0.997	0.993	2.4e-20	CXCL9.Mono	NEAT1
RPS171	9.52e-25	0.347161	1	1	2.43e-20	CXCL9.Mono	RPS17
SUB1	1.28e-24	0.456456	0.991	0.982	3.28e-20	CXCL9.Mono	SUB1
H3F3B1	1.37e-24	0.400899	1	0.999	3.49e-20	CXCL9.Mono	H3F3B
ADA2	1.97e-24	0.517152	0.976	0.859	5.03e-20	CXCL9.Mono	ADA2
TNFAIP81	2.33e-24	0.703691	0.763	0.62	5.95e-20	CXCL9.Mono	TNFAIP8
RPL33	6.44e-24	0.359239	1	1	1.65e-19	CXCL9.Mono	RPL3
RPL241	7.83e-24	0.314541	1	1	2e-19	CXCL9.Mono	RPL24
ABCA1	8.06e-24	0.637496	0.658	0.413	2.06e-19	CXCL9.Mono	ABCA1
CD40	1.37e-23	0.625849	0.622	0.416	3.5e-19	CXCL9.Mono	CD40
OTOA	2.54e-23	0.409359	0.315	0.13	6.48e-19	CXCL9.Mono	OTOA
CD300A	2.76e-23	0.43714	0.456	0.238	7.04e-19	CXCL9.Mono	CD300A
ITPRIPL22	2.96e-23	0.556739	0.778	0.623	7.57e-19	CXCL9.Mono	ITPRIPL2
RPL371	3e-23	0.337287	1	1	7.67e-19	CXCL9.Mono	RPL37
RPL391	3.26e-23	0.281399	1	1	8.34e-19	CXCL9.Mono	RPL39
GBP2	3.55e-23	0.656233	0.673	0.49	9.08e-19	CXCL9.Mono	GBP2
KCTD122	3.71e-23	0.489077	0.991	0.955	9.48e-19	CXCL9.Mono	KCTD12
RPL231	5.53e-23	0.302877	1	1	1.41e-18	CXCL9.Mono	RPL23
CYTOR1	5.74e-23	0.572111	0.514	0.301	1.47e-18	CXCL9.Mono	CYTOR
HNRNPA31	6.02e-23	0.400277	0.997	0.961	1.54e-18	CXCL9.Mono	HNRNPA3
CD274	6.74e-23	0.46116	0.333	0.149	1.72e-18	CXCL9.Mono	CD274
RPLP21	6.88e-23	0.25498	1	1	1.76e-18	CXCL9.Mono	RPLP2
LILRB1	7.1e-23	0.656175	0.634	0.443	1.81e-18	CXCL9.Mono	LILRB1
EEF1B21	8.07e-23	0.35365	1	0.999	2.06e-18	CXCL9.Mono	EEF1B2
RPS31	8.56e-23	0.291439	1	1	2.19e-18	CXCL9.Mono	RPS3
HLA-DPA1	9.22e-23	0.470501	1	1	2.35e-18	CXCL9.Mono	HLA-DPA1
NUB1	9.97e-23	0.607137	0.841	0.688	2.55e-18	CXCL9.Mono	NUB1
RPS71	1.01e-22	0.322015	1	1	2.57e-18	CXCL9.Mono	RPS7
P2RX71	1.64e-22	0.684207	0.571	0.379	4.18e-18	CXCL9.Mono	P2RX7
GBP1	1.72e-22	1.43746	0.877	0.806	4.39e-18	CXCL9.Mono	GBP1
RPS15A1	2.69e-22	0.263005	1	1	6.87e-18	CXCL9.Mono	RPS15A
RPL191	3.23e-22	0.28549	1	1	8.25e-18	CXCL9.Mono	RPL19
HLA-B1	3.56e-22	0.293345	1	1	9.09e-18	CXCL9.Mono	HLA-B
GK1	3.91e-22	0.759715	0.775	0.664	1e-17	CXCL9.Mono	GK
PTPRC	6.02e-22	0.401893	1	0.999	1.54e-17	CXCL9.Mono	PTPRC
RPS231	7.53e-22	0.318708	1	1	1.92e-17	CXCL9.Mono	RPS23
PTPN1	9.11e-22	0.591099	0.763	0.6	2.33e-17	CXCL9.Mono	PTPN1
ASCL2	9.32e-22	0.329573	0.267	0.106	2.38e-17	CXCL9.Mono	ASCL2
RPL261	9.4e-22	0.300056	1	1	2.4e-17	CXCL9.Mono	RPL26
RPL361	1.15e-21	0.30179	1	1	2.93e-17	CXCL9.Mono	RPL36
ZEB22	1.22e-21	0.443289	0.994	0.985	3.12e-17	CXCL9.Mono	ZEB2
RPL23A1	1.24e-21	0.309117	1	1	3.17e-17	CXCL9.Mono	RPL23A
ATF31	1.68e-21	0.603566	0.345	0.159	4.29e-17	CXCL9.Mono	ATF3
RPL321	1.7e-21	0.277618	1	1	4.34e-17	CXCL9.Mono	RPL32
RPL351	1.77e-21	0.279212	1	1	4.52e-17	CXCL9.Mono	RPL35
ZMIZ11	1.84e-21	0.534607	0.799	0.654	4.7e-17	CXCL9.Mono	ZMIZ1
HERPUD1	1.88e-21	0.561284	0.925	0.809	4.81e-17	CXCL9.Mono	HERPUD1
HLA-A	2.26e-21	0.333595	1	1	5.78e-17	CXCL9.Mono	HLA-A
RPL37A1	2.67e-21	0.305885	1	1	6.82e-17	CXCL9.Mono	RPL37A
RPL51	3.42e-21	0.333169	1	1	8.74e-17	CXCL9.Mono	RPL5
SPECC1	5.27e-21	0.329159	0.294	0.124	1.35e-16	CXCL9.Mono	SPECC1
UBC2	6.1e-21	0.403187	1	0.982	1.56e-16	CXCL9.Mono	UBC
SGTB	6.75e-21	0.56288	0.477	0.274	1.73e-16	CXCL9.Mono	SGTB
KDM7A2	6.98e-21	0.415114	0.417	0.211	1.78e-16	CXCL9.Mono	KDM7A
NFE2L3	7.09e-21	0.531423	0.393	0.208	1.81e-16	CXCL9.Mono	NFE2L3
TRAF3	7.2e-21	0.34391	0.375	0.179	1.84e-16	CXCL9.Mono	TRAF3
EPSTI1	1.05e-20	0.688963	0.79	0.66	2.68e-16	CXCL9.Mono	EPSTI1
GASK1B	1.26e-20	0.407911	0.375	0.182	3.22e-16	CXCL9.Mono	GASK1B
GPX4	1.35e-20	0.347536	1	1	3.45e-16	CXCL9.Mono	GPX4
RPL18A1	1.78e-20	0.310789	1	1	4.53e-16	CXCL9.Mono	RPL18A
IL18BP	2.02e-20	0.425472	0.309	0.139	5.15e-16	CXCL9.Mono	IL18BP
NBN	3.45e-20	0.559938	0.727	0.565	8.81e-16	CXCL9.Mono	NBN
SOCS11	4.31e-20	0.855979	0.429	0.246	1.1e-15	CXCL9.Mono	SOCS1
EEF1A11	4.4e-20	0.270217	1	1	1.12e-15	CXCL9.Mono	EEF1A1
TAPBP	5.86e-20	0.412726	0.967	0.943	1.5e-15	CXCL9.Mono	TAPBP
IL1B1	8.63e-20	1.88697	0.387	0.214	2.2e-15	CXCL9.Mono	IL1B
DENND3	1.1e-19	0.359723	0.297	0.132	2.82e-15	CXCL9.Mono	DENND3
HLA-DPB1	2.23e-19	0.472537	1	1	5.7e-15	CXCL9.Mono	HLA-DPB1
GNB41	2.27e-19	0.467583	0.928	0.832	5.81e-15	CXCL9.Mono	GNB4
RPS271	2.3e-19	0.29831	1	1	5.89e-15	CXCL9.Mono	RPS27
MMP2-AS1	2.38e-19	0.398948	0.288	0.129	6.08e-15	CXCL9.Mono	MMP2-AS1
EEF1G1	2.45e-19	0.35026	0.997	0.991	6.26e-15	CXCL9.Mono	EEF1G
RNF19B	2.76e-19	0.599079	0.444	0.267	7.05e-15	CXCL9.Mono	RNF19B
SMAP2	2.83e-19	0.488971	0.847	0.724	7.24e-15	CXCL9.Mono	SMAP2
IGFLR1	3.6e-19	0.577247	0.535	0.351	9.2e-15	CXCL9.Mono	IGFLR1
ARFGAP31	4.93e-19	0.468148	0.814	0.656	1.26e-14	CXCL9.Mono	ARFGAP3
RPL211	5.05e-19	0.252055	1	1	1.29e-14	CXCL9.Mono	RPL21
CEBPD1	5.2e-19	0.703216	0.679	0.538	1.33e-14	CXCL9.Mono	CEBPD
FPR12	5.36e-19	0.706848	0.706	0.559	1.37e-14	CXCL9.Mono	FPR1
SNHG51	5.45e-19	0.4094	0.976	0.906	1.39e-14	CXCL9.Mono	SNHG5
SMCO4	5.88e-19	0.436394	0.982	0.939	1.5e-14	CXCL9.Mono	SMCO4
RPL61	6.49e-19	0.281269	1	1	1.66e-14	CXCL9.Mono	RPL6
PDIA3	6.72e-19	0.497814	0.988	0.965	1.72e-14	CXCL9.Mono	PDIA3
CSF3R1	7.76e-19	0.489962	0.541	0.348	1.98e-14	CXCL9.Mono	CSF3R
SGPL1	8.7e-19	0.460147	0.505	0.308	2.22e-14	CXCL9.Mono	SGPL1
TNFAIP2	1.2e-18	0.506215	0.919	0.781	3.08e-14	CXCL9.Mono	TNFAIP2
RPS151	1.41e-18	0.250891	1	1	3.59e-14	CXCL9.Mono	RPS15
SET2	1.87e-18	0.31952	1	0.984	4.79e-14	CXCL9.Mono	SET
NPM11	2.57e-18	0.340256	0.994	0.992	6.57e-14	CXCL9.Mono	NPM1
CCND22	3.45e-18	0.594854	0.327	0.161	8.82e-14	CXCL9.Mono	CCND2
ZNF385A1	4.76e-18	0.414831	0.586	0.395	1.22e-13	CXCL9.Mono	ZNF385A
LYZ1	5.08e-18	0.473823	1	1	1.3e-13	CXCL9.Mono	LYZ
BCL3	5.54e-18	0.49394	0.33	0.165	1.41e-13	CXCL9.Mono	BCL3
UGCG	5.58e-18	0.605617	0.508	0.321	1.43e-13	CXCL9.Mono	UGCG
LMNB11	5.82e-18	0.447025	0.348	0.181	1.49e-13	CXCL9.Mono	LMNB1
RPL42	6.33e-18	0.325711	1	0.997	1.62e-13	CXCL9.Mono	RPL4
IRF1	7.02e-18	0.88137	0.793	0.655	1.79e-13	CXCL9.Mono	IRF1
ACTR3	8.09e-18	0.312498	0.994	0.994	2.07e-13	CXCL9.Mono	ACTR3
ATP13A31	9.68e-18	0.655054	0.682	0.525	2.47e-13	CXCL9.Mono	ATP13A3
SLC8A1-AS1	9.84e-18	0.332495	0.315	0.15	2.51e-13	CXCL9.Mono	SLC8A1-AS1
JAK2	1.07e-17	0.567282	0.517	0.35	2.72e-13	CXCL9.Mono	JAK2
ST8SIA4	1.49e-17	0.395867	0.402	0.218	3.81e-13	CXCL9.Mono	ST8SIA4
NAMPT1	1.71e-17	0.743228	0.967	0.898	4.38e-13	CXCL9.Mono	NAMPT
NCF1	1.72e-17	0.641599	0.736	0.574	4.38e-13	CXCL9.Mono	NCF1
PCBP11	2.69e-17	0.334594	1	0.985	6.86e-13	CXCL9.Mono	PCBP1
CREBL2	4.73e-17	0.490142	0.619	0.454	1.21e-12	CXCL9.Mono	CREBL2
TFEC	5.32e-17	0.408506	0.973	0.886	1.36e-12	CXCL9.Mono	TFEC
HLA-F1	5.47e-17	0.405968	0.955	0.887	1.4e-12	CXCL9.Mono	HLA-F
FUS1	5.72e-17	0.383233	0.931	0.804	1.46e-12	CXCL9.Mono	FUS
PSME1	6.01e-17	0.380224	0.979	0.962	1.54e-12	CXCL9.Mono	PSME1
VOPP1	7.39e-17	0.471205	0.697	0.544	1.89e-12	CXCL9.Mono	VOPP1
ST3GAL5	8.1e-17	0.433472	0.495	0.31	2.07e-12	CXCL9.Mono	ST3GAL5
IFI161	1.36e-16	0.408315	0.985	0.953	3.48e-12	CXCL9.Mono	IFI16
RHBDF2	1.46e-16	0.342362	0.339	0.175	3.72e-12	CXCL9.Mono	RHBDF2
CLEC4E1	1.64e-16	0.654723	0.48	0.308	4.18e-12	CXCL9.Mono	CLEC4E
TTYH3	1.69e-16	0.422404	0.468	0.285	4.32e-12	CXCL9.Mono	TTYH3
SDSL	2.93e-16	0.430381	0.483	0.308	7.48e-12	CXCL9.Mono	SDSL
NUP621	2.99e-16	0.485158	0.556	0.39	7.63e-12	CXCL9.Mono	NUP62
DRAM1	3.74e-16	0.614866	0.676	0.532	9.55e-12	CXCL9.Mono	DRAM1
ARHGEF40	3.9e-16	0.260403	0.264	0.117	9.95e-12	CXCL9.Mono	ARHGEF40
ZFYVE161	4.09e-16	0.510351	0.865	0.734	1.05e-11	CXCL9.Mono	ZFYVE16
MGAT11	4.48e-16	0.37766	0.931	0.866	1.14e-11	CXCL9.Mono	MGAT1
STK38L1	4.72e-16	0.371325	0.441	0.257	1.2e-11	CXCL9.Mono	STK38L
PDE4B	6.26e-16	0.543998	0.39	0.225	1.6e-11	CXCL9.Mono	PDE4B
MAT2A1	6.41e-16	0.406556	0.838	0.704	1.64e-11	CXCL9.Mono	MAT2A
OAZ2	6.54e-16	0.390223	0.429	0.255	1.67e-11	CXCL9.Mono	OAZ2
GSDME	7.6e-16	0.255368	0.252	0.11	1.94e-11	CXCL9.Mono	GSDME
IFNAR2	7.9e-16	0.409124	0.55	0.375	2.02e-11	CXCL9.Mono	IFNAR2
ARHGAP45	1.42e-15	0.280888	0.294	0.14	3.62e-11	CXCL9.Mono	ARHGAP45
ICAM1	1.45e-15	0.663694	0.511	0.357	3.72e-11	CXCL9.Mono	ICAM1
NAGK	2.58e-15	0.423538	0.844	0.748	6.58e-11	CXCL9.Mono	NAGK
PLXND1	2.87e-15	0.454595	0.526	0.355	7.33e-11	CXCL9.Mono	PLXND1
NECTIN2	3.55e-15	0.385439	0.39	0.226	9.07e-11	CXCL9.Mono	NECTIN2
IER21	3.76e-15	0.539894	0.688	0.547	9.6e-11	CXCL9.Mono	IER2
HAVCR2	3.93e-15	0.422961	0.784	0.653	1e-10	CXCL9.Mono	HAVCR2
RACK11	4.19e-15	0.265089	1	0.999	1.07e-10	CXCL9.Mono	RACK1
NFKBIA	4.52e-15	0.83881	0.94	0.888	1.16e-10	CXCL9.Mono	NFKBIA
RCSD1	4.56e-15	0.333234	0.363	0.197	1.16e-10	CXCL9.Mono	RCSD1
HNRNPA11	5.66e-15	0.319243	0.973	0.94	1.45e-10	CXCL9.Mono	HNRNPA1
DENND1B1	6.19e-15	0.476809	0.571	0.413	1.58e-10	CXCL9.Mono	DENND1B
RPL13A1	9.81e-15	0.257622	1	1	2.5e-10	CXCL9.Mono	RPL13A
CMKLR1	1.2e-14	0.300247	0.273	0.128	3.08e-10	CXCL9.Mono	CMKLR1
TES1	1.24e-14	0.352827	0.559	0.379	3.17e-10	CXCL9.Mono	TES
VASH11	1.26e-14	0.44029	0.514	0.342	3.22e-10	CXCL9.Mono	VASH1
MCTP1	1.32e-14	0.437407	0.502	0.331	3.38e-10	CXCL9.Mono	MCTP1
ENTPD1	1.33e-14	0.392759	0.45	0.277	3.39e-10	CXCL9.Mono	ENTPD1
SH3KBP12	1.35e-14	0.430011	0.613	0.463	3.44e-10	CXCL9.Mono	SH3KBP1
RPL311	1.54e-14	0.284258	1	0.999	3.93e-10	CXCL9.Mono	RPL31
SRSF31	1.6e-14	0.348017	0.973	0.935	4.09e-10	CXCL9.Mono	SRSF3
ETV6	1.82e-14	0.469406	0.604	0.456	4.65e-10	CXCL9.Mono	ETV6
MEF2A2	2.11e-14	0.39748	0.841	0.772	5.38e-10	CXCL9.Mono	MEF2A
SLC9A7	2.19e-14	0.251551	0.264	0.126	5.6e-10	CXCL9.Mono	SLC9A7
HIVEP31	2.21e-14	0.497902	0.36	0.206	5.65e-10	CXCL9.Mono	HIVEP3
LACTB1	2.26e-14	0.318729	0.979	0.947	5.78e-10	CXCL9.Mono	LACTB
SLC25A61	2.42e-14	0.344194	0.994	0.983	6.19e-10	CXCL9.Mono	SLC25A6
KYNU	2.51e-14	0.539705	0.697	0.583	6.41e-10	CXCL9.Mono	KYNU
WIPF11	3.29e-14	0.409117	0.85	0.739	8.4e-10	CXCL9.Mono	WIPF1
WTAP	3.47e-14	0.453724	0.691	0.552	8.85e-10	CXCL9.Mono	WTAP
IL2RG	3.47e-14	0.454399	0.742	0.604	8.87e-10	CXCL9.Mono	IL2RG
LILRB32	3.64e-14	0.407013	0.754	0.651	9.29e-10	CXCL9.Mono	LILRB3
RFTN1	3.64e-14	0.32831	0.27	0.133	9.3e-10	CXCL9.Mono	RFTN1
PARP14	3.9e-14	0.551562	0.961	0.914	9.96e-10	CXCL9.Mono	PARP14
IFNGR21	4.19e-14	0.43373	0.913	0.84	1.07e-09	CXCL9.Mono	IFNGR2
SWAP70	4.2e-14	0.400261	0.658	0.517	1.07e-09	CXCL9.Mono	SWAP70
ABI3	4.42e-14	0.318492	0.366	0.205	1.13e-09	CXCL9.Mono	ABI3
COTL11	4.8e-14	0.414318	0.997	0.993	1.23e-09	CXCL9.Mono	COTL1
NFKBIE	5.03e-14	0.329725	0.363	0.208	1.28e-09	CXCL9.Mono	NFKBIE
PSMB10	5.1e-14	0.380143	0.922	0.846	1.3e-09	CXCL9.Mono	PSMB10
RPL7A1	5.59e-14	0.275836	1	1	1.43e-09	CXCL9.Mono	RPL7A
HNRNPD1	5.69e-14	0.318667	0.943	0.889	1.45e-09	CXCL9.Mono	HNRNPD
HM132	5.88e-14	0.372878	0.73	0.573	1.5e-09	CXCL9.Mono	HM13
DNPH1	5.92e-14	0.502844	0.568	0.436	1.51e-09	CXCL9.Mono	DNPH1
CSF2RB	7.4e-14	0.528914	0.625	0.506	1.89e-09	CXCL9.Mono	CSF2RB
TBC1D2B	8.78e-14	0.323376	0.396	0.237	2.24e-09	CXCL9.Mono	TBC1D2B
UBE2D1	9e-14	0.389672	0.871	0.786	2.3e-09	CXCL9.Mono	UBE2D1
BCL21	1.01e-13	0.269067	0.258	0.123	2.58e-09	CXCL9.Mono	BCL2
CCL22	1.02e-13	1.25933	0.426	0.254	2.61e-09	CXCL9.Mono	CCL2
A2M1	1.27e-13	0.724807	0.405	0.257	3.23e-09	CXCL9.Mono	A2M
FGR1	1.35e-13	0.388922	0.664	0.517	3.45e-09	CXCL9.Mono	FGR
RUFY3	1.45e-13	0.390827	0.535	0.376	3.69e-09	CXCL9.Mono	RUFY3
PRKAG21	1.57e-13	0.428716	0.489	0.335	4.01e-09	CXCL9.Mono	PRKAG2
EPB41L3	1.69e-13	0.435824	0.754	0.65	4.32e-09	CXCL9.Mono	EPB41L3
EMB2	2.01e-13	0.349656	0.532	0.345	5.12e-09	CXCL9.Mono	EMB
SCAF11	2.02e-13	0.25336	0.991	0.981	5.15e-09	CXCL9.Mono	SCAF11
LSP12	2.14e-13	0.378414	0.928	0.819	5.46e-09	CXCL9.Mono	LSP1
XRN1	2.57e-13	0.484312	0.601	0.483	6.57e-09	CXCL9.Mono	XRN1
SMIM29	2.6e-13	0.351338	0.468	0.302	6.63e-09	CXCL9.Mono	SMIM29
RPS4Y11	2.67e-13	0.368478	0.841	0.644	6.82e-09	CXCL9.Mono	RPS4Y1
TLR22	3.07e-13	0.456439	0.511	0.352	7.85e-09	CXCL9.Mono	TLR2
SERPINB1	3.28e-13	0.397327	0.988	0.984	8.37e-09	CXCL9.Mono	SERPINB1
RAP2B2	3.41e-13	0.39406	0.823	0.744	8.7e-09	CXCL9.Mono	RAP2B
NABP1	3.95e-13	0.436306	0.616	0.468	1.01e-08	CXCL9.Mono	NABP1
FCHSD2	4.25e-13	0.384651	0.426	0.276	1.09e-08	CXCL9.Mono	FCHSD2
MIF2	4.34e-13	0.339006	0.997	0.986	1.11e-08	CXCL9.Mono	MIF
PLEKHA2	5.71e-13	0.365318	0.652	0.517	1.46e-08	CXCL9.Mono	PLEKHA2
TIMP11	6.84e-13	0.935864	0.946	0.916	1.75e-08	CXCL9.Mono	TIMP1
TLR1	7.15e-13	0.377664	0.508	0.351	1.83e-08	CXCL9.Mono	TLR1
PABPC41	7.25e-13	0.334073	0.787	0.649	1.85e-08	CXCL9.Mono	PABPC4
PLSCR11	7.61e-13	0.415809	0.949	0.921	1.94e-08	CXCL9.Mono	PLSCR1
UBE2L6	8.3e-13	0.407904	0.82	0.726	2.12e-08	CXCL9.Mono	UBE2L6
AHR2	8.41e-13	0.49528	0.835	0.768	2.15e-08	CXCL9.Mono	AHR
TANK	9.01e-13	0.350663	0.781	0.662	2.3e-08	CXCL9.Mono	TANK
FCGR2B2	1.09e-12	0.368587	0.502	0.317	2.78e-08	CXCL9.Mono	FCGR2B
ZFP36L11	1.11e-12	0.370239	0.943	0.839	2.84e-08	CXCL9.Mono	ZFP36L1
CD83	1.14e-12	0.633078	0.718	0.585	2.91e-08	CXCL9.Mono	CD83
CCR52	1.54e-12	0.301293	0.336	0.189	3.94e-08	CXCL9.Mono	CCR5
RBM31	1.67e-12	0.297474	0.997	0.986	4.26e-08	CXCL9.Mono	RBM3
BMP2K	1.67e-12	0.362075	0.733	0.6	4.27e-08	CXCL9.Mono	BMP2K
DUSP101	1.75e-12	0.332631	0.369	0.22	4.48e-08	CXCL9.Mono	DUSP10
IFNAR1	1.9e-12	0.366481	0.853	0.748	4.86e-08	CXCL9.Mono	IFNAR1
SLFN51	2.08e-12	0.481912	0.673	0.552	5.31e-08	CXCL9.Mono	SLFN5
ITGAV1	2.28e-12	0.508949	0.604	0.481	5.82e-08	CXCL9.Mono	ITGAV
MED13L1	2.59e-12	0.424765	0.634	0.504	6.62e-08	CXCL9.Mono	MED13L
HNRNPU1	2.64e-12	0.272824	0.994	0.971	6.75e-08	CXCL9.Mono	HNRNPU
METRNL2	2.93e-12	0.362302	0.853	0.753	7.48e-08	CXCL9.Mono	METRNL
TOR3A	3.27e-12	0.409398	0.42	0.277	8.36e-08	CXCL9.Mono	TOR3A
LYN	3.87e-12	0.338878	0.982	0.932	9.9e-08	CXCL9.Mono	LYN
NAPA	4.07e-12	0.366845	0.661	0.535	1.04e-07	CXCL9.Mono	NAPA
TNIP1	4.37e-12	0.456657	0.369	0.228	1.12e-07	CXCL9.Mono	TNIP1
GLS	4.71e-12	0.399904	0.679	0.569	1.2e-07	CXCL9.Mono	GLS
PRELID11	4.83e-12	0.438711	0.985	0.972	1.23e-07	CXCL9.Mono	PRELID1
PRDX1	4.96e-12	0.322793	1	0.999	1.27e-07	CXCL9.Mono	PRDX1
DDX171	5.08e-12	0.264154	0.988	0.94	1.3e-07	CXCL9.Mono	DDX17
SSR4	5.83e-12	0.25805	0.991	0.982	1.49e-07	CXCL9.Mono	SSR4
NAIP	6.15e-12	0.41788	0.607	0.469	1.57e-07	CXCL9.Mono	NAIP
DSE1	6.59e-12	0.407999	0.946	0.897	1.68e-07	CXCL9.Mono	DSE
CSF2RA	7.1e-12	0.471409	0.601	0.488	1.81e-07	CXCL9.Mono	CSF2RA
AC090559.1	7.78e-12	0.331284	0.514	0.36	1.99e-07	CXCL9.Mono	AC090559.1
EIF4A1	8.06e-12	0.276648	1	0.992	2.06e-07	CXCL9.Mono	EIF4A1
PRRC2C	1.15e-11	0.253487	0.997	0.979	2.93e-07	CXCL9.Mono	PRRC2C
PTAFR1	1.16e-11	0.409718	0.859	0.795	2.96e-07	CXCL9.Mono	PTAFR
CD4	1.27e-11	0.397125	0.862	0.764	3.23e-07	CXCL9.Mono	CD4
MMP141	1.44e-11	0.368045	0.465	0.316	3.68e-07	CXCL9.Mono	MMP14
PRKAR1A	1.61e-11	0.316752	0.904	0.851	4.11e-07	CXCL9.Mono	PRKAR1A
GSAP	1.61e-11	0.354854	0.694	0.573	4.12e-07	CXCL9.Mono	GSAP
MT-ATP62	1.66e-11	0.254419	1	1	4.25e-07	CXCL9.Mono	MT-ATP6
EDF1	2.47e-11	0.26379	0.982	0.969	6.31e-07	CXCL9.Mono	EDF1
EDEM1	2.53e-11	0.447098	0.55	0.421	6.47e-07	CXCL9.Mono	EDEM1
IL18	2.86e-11	0.464916	0.868	0.782	7.31e-07	CXCL9.Mono	IL18
RIPK21	3.51e-11	0.442171	0.508	0.377	8.97e-07	CXCL9.Mono	RIPK2
PLBD2	3.56e-11	0.334818	0.441	0.298	9.08e-07	CXCL9.Mono	PLBD2
REL	3.97e-11	0.448838	0.763	0.695	1.01e-06	CXCL9.Mono	REL
DNMT12	4.1e-11	0.322799	0.784	0.653	1.05e-06	CXCL9.Mono	DNMT1
NAAA	4.15e-11	0.344739	0.598	0.468	1.06e-06	CXCL9.Mono	NAAA
SLC44A11	4.42e-11	0.361441	0.432	0.283	1.13e-06	CXCL9.Mono	SLC44A1
NOTCH2	4.56e-11	0.397503	0.559	0.428	1.17e-06	CXCL9.Mono	NOTCH2
VSIR1	4.6e-11	0.354394	0.429	0.291	1.17e-06	CXCL9.Mono	VSIR
SMG11	5.42e-11	0.346149	0.718	0.605	1.38e-06	CXCL9.Mono	SMG1
RNF213	5.47e-11	0.409524	0.979	0.96	1.4e-06	CXCL9.Mono	RNF213
MOB1A	6.17e-11	0.254492	0.997	0.982	1.58e-06	CXCL9.Mono	MOB1A
IL6ST	6.4e-11	0.401763	0.607	0.491	1.63e-06	CXCL9.Mono	IL6ST
SCO21	7.36e-11	0.3738	0.517	0.384	1.88e-06	CXCL9.Mono	SCO2
CUX1	7.72e-11	0.351214	0.613	0.489	1.97e-06	CXCL9.Mono	CUX1
TMEM51	1.02e-10	0.372322	0.505	0.364	2.59e-06	CXCL9.Mono	TMEM51
CDC42SE2	1.04e-10	0.379644	0.568	0.449	2.66e-06	CXCL9.Mono	CDC42SE2
TAGAP1	1.12e-10	0.417737	0.48	0.344	2.87e-06	CXCL9.Mono	TAGAP
AP1S22	1.28e-10	0.380269	0.778	0.713	3.27e-06	CXCL9.Mono	AP1S2
AKR1A1	1.29e-10	0.286454	0.979	0.944	3.3e-06	CXCL9.Mono	AKR1A1
NFE2L2	1.35e-10	0.342926	0.97	0.907	3.44e-06	CXCL9.Mono	NFE2L2
SDC4	1.56e-10	0.34705	0.36	0.227	4e-06	CXCL9.Mono	SDC4
ANKRD44	1.6e-10	0.394448	0.571	0.448	4.1e-06	CXCL9.Mono	ANKRD44
SRSF7	1.68e-10	0.286446	0.958	0.897	4.28e-06	CXCL9.Mono	SRSF7
CELF21	1.81e-10	0.299681	0.868	0.792	4.63e-06	CXCL9.Mono	CELF2
PNISR	1.81e-10	0.343491	0.886	0.817	4.63e-06	CXCL9.Mono	PNISR
MYO1F	1.86e-10	0.312412	0.685	0.568	4.75e-06	CXCL9.Mono	MYO1F
ENO11	2.43e-10	0.282695	0.997	0.973	6.22e-06	CXCL9.Mono	ENO1
SLC4A71	2.9e-10	0.385535	0.477	0.342	7.4e-06	CXCL9.Mono	SLC4A7
PREX11	3.37e-10	0.357225	0.592	0.47	8.61e-06	CXCL9.Mono	PREX1
CCRL21	3.92e-10	0.374667	0.411	0.278	1e-05	CXCL9.Mono	CCRL2
SIPA1L1	4.25e-10	0.295171	0.324	0.195	1.08e-05	CXCL9.Mono	SIPA1L1
PFKFB3	4.31e-10	0.364893	0.27	0.153	1.1e-05	CXCL9.Mono	PFKFB3
MGAT4A1	4.69e-10	0.373818	0.829	0.742	1.2e-05	CXCL9.Mono	MGAT4A
SNX20	7.09e-10	0.343291	0.405	0.278	1.81e-05	CXCL9.Mono	SNX20
JARID2	7.64e-10	0.307467	0.447	0.302	1.95e-05	CXCL9.Mono	JARID2
NCOA4	7.81e-10	0.351894	0.913	0.868	2e-05	CXCL9.Mono	NCOA4
CKLF2	7.85e-10	0.420692	0.976	0.966	2e-05	CXCL9.Mono	CKLF
NFKBIZ	9.39e-10	0.401866	0.405	0.278	2.4e-05	CXCL9.Mono	NFKBIZ
MBOAT71	1.02e-09	0.308519	0.312	0.19	2.62e-05	CXCL9.Mono	MBOAT7
SNAP23	1.16e-09	0.375596	0.595	0.5	2.95e-05	CXCL9.Mono	SNAP23
KLF62	1.18e-09	0.398407	0.958	0.909	3.01e-05	CXCL9.Mono	KLF6
RAB32	1.27e-09	0.318032	0.871	0.82	3.26e-05	CXCL9.Mono	RAB32
MYCBP2	1.33e-09	0.311137	0.883	0.772	3.4e-05	CXCL9.Mono	MYCBP2
RBM4	1.44e-09	0.290144	0.529	0.407	3.69e-05	CXCL9.Mono	RBM4
ATP6V1C1	1.45e-09	0.319843	0.646	0.532	3.7e-05	CXCL9.Mono	ATP6V1C1
OSBPL82	1.55e-09	0.277864	0.946	0.894	3.97e-05	CXCL9.Mono	OSBPL8
FOXN3	1.56e-09	0.371644	0.682	0.587	3.99e-05	CXCL9.Mono	FOXN3
PRMT21	1.57e-09	0.287814	0.817	0.702	4e-05	CXCL9.Mono	PRMT2
GABARAPL2	1.58e-09	0.345063	0.97	0.946	4.02e-05	CXCL9.Mono	GABARAPL2
EIF3F1	2.12e-09	0.254627	0.982	0.909	5.41e-05	CXCL9.Mono	EIF3F
HNRNPM1	2.14e-09	0.322935	0.91	0.843	5.47e-05	CXCL9.Mono	HNRNPM
ITPR2	2.24e-09	0.325661	0.838	0.743	5.72e-05	CXCL9.Mono	ITPR2
SLC41A2	2.55e-09	0.272121	0.261	0.15	6.5e-05	CXCL9.Mono	SLC41A2
ARL6IP5	2.55e-09	0.266872	0.997	0.996	6.52e-05	CXCL9.Mono	ARL6IP5
VPS13C	2.65e-09	0.279971	0.979	0.921	6.76e-05	CXCL9.Mono	VPS13C
STX7	2.68e-09	0.313454	0.937	0.865	6.86e-05	CXCL9.Mono	STX7
LPCAT21	3.18e-09	0.279616	0.79	0.693	8.12e-05	CXCL9.Mono	LPCAT2
P2RY13	3.46e-09	0.475694	0.45	0.335	8.84e-05	CXCL9.Mono	P2RY13
RNF144B	3.51e-09	0.370417	0.357	0.239	8.96e-05	CXCL9.Mono	RNF144B
UBE2Z	3.62e-09	0.358112	0.526	0.412	9.25e-05	CXCL9.Mono	UBE2Z
B4GALT5	3.67e-09	0.409644	0.474	0.372	9.37e-05	CXCL9.Mono	B4GALT5
AC005670.3	4.46e-09	0.286698	0.324	0.205	0.000113964	CXCL9.Mono	AC005670.3
SORL12	4.79e-09	0.399019	0.616	0.532	0.000122359	CXCL9.Mono	SORL1
CALR	5.1e-09	0.319408	0.994	0.987	0.000130203	CXCL9.Mono	CALR
PSMB4	5.54e-09	0.268617	0.895	0.821	0.000141383	CXCL9.Mono	PSMB4
SFT2D2	5.64e-09	0.331893	0.712	0.603	0.000143965	CXCL9.Mono	SFT2D2
KCNMA1	5.68e-09	0.424384	0.559	0.439	0.000145112	CXCL9.Mono	KCNMA1
CTNND1	6.39e-09	0.313561	0.661	0.573	0.000163325	CXCL9.Mono	CTNND1
SGK31	7.05e-09	0.287859	0.907	0.827	0.000179992	CXCL9.Mono	SGK3
ZFP362	7.36e-09	0.355569	0.898	0.831	0.000187936	CXCL9.Mono	ZFP36
FKBP5	8.52e-09	0.370907	0.739	0.628	0.000217586	CXCL9.Mono	FKBP5
RPS291	8.71e-09	0.255195	1	1	0.000222588	CXCL9.Mono	RPS29
WDFY1	9.09e-09	0.32774	0.55	0.439	0.000232114	CXCL9.Mono	WDFY1
GIMAP7	9.65e-09	0.319151	0.297	0.184	0.000246393	CXCL9.Mono	GIMAP7
FNBP1	1.03e-08	0.292073	0.787	0.721	0.000264017	CXCL9.Mono	FNBP1
ARL8B1	1.05e-08	0.293803	0.901	0.843	0.000266941	CXCL9.Mono	ARL8B
PLEKHF2	1.11e-08	0.327047	0.465	0.356	0.000283624	CXCL9.Mono	PLEKHF2
IDH2	1.27e-08	0.362025	0.477	0.371	0.000325487	CXCL9.Mono	IDH2
RSAD21	1.28e-08	1.15358	0.282	0.18	0.000326718	CXCL9.Mono	RSAD2
PTPN21	1.3e-08	0.307742	0.811	0.704	0.000331372	CXCL9.Mono	PTPN2
CHMP4B	1.31e-08	0.271568	0.784	0.702	0.00033414	CXCL9.Mono	CHMP4B
CIITA	1.36e-08	0.374351	0.634	0.54	0.000346546	CXCL9.Mono	CIITA
APOBEC3G	1.48e-08	0.274419	0.363	0.247	0.00037682	CXCL9.Mono	APOBEC3G
IL10RA	1.61e-08	0.346759	0.628	0.538	0.000412021	CXCL9.Mono	IL10RA
NADK	1.66e-08	0.267004	0.408	0.278	0.000423037	CXCL9.Mono	NADK
SCLT1	1.77e-08	0.270969	0.315	0.202	0.000452678	CXCL9.Mono	SCLT1
ZNF22	1.78e-08	0.252444	0.42	0.293	0.000455803	CXCL9.Mono	ZNF22
HPS3	1.84e-08	0.321642	0.408	0.29	0.00046968	CXCL9.Mono	HPS3
IL15	1.93e-08	0.267692	0.279	0.172	0.000492091	CXCL9.Mono	IL15
RGS21	1.93e-08	0.525093	0.495	0.387	0.000492822	CXCL9.Mono	RGS2
ZNRF2	1.94e-08	0.335576	0.474	0.367	0.000495099	CXCL9.Mono	ZNRF2
ABHD12	1.98e-08	0.34687	0.565	0.463	0.000506758	CXCL9.Mono	ABHD12
SLC43A31	2.07e-08	0.31891	0.628	0.524	0.000529406	CXCL9.Mono	SLC43A3
CORO1A2	2.12e-08	0.266641	0.565	0.413	0.000541738	CXCL9.Mono	CORO1A
TACC1	2.68e-08	0.255116	0.835	0.758	0.000684971	CXCL9.Mono	TACC1
SETDB2	2.69e-08	0.341899	0.45	0.346	0.000687042	CXCL9.Mono	SETDB2
SPAG91	2.94e-08	0.268398	0.814	0.704	0.000750301	CXCL9.Mono	SPAG9
SEMA4D1	3.36e-08	0.325048	0.378	0.266	0.000858914	CXCL9.Mono	SEMA4D
EVI2A1	3.7e-08	0.296481	0.76	0.674	0.000945169	CXCL9.Mono	EVI2A
TAF71	4.01e-08	0.27511	0.625	0.49	0.00102298	CXCL9.Mono	TAF7
CYFIP1	4.84e-08	0.313082	0.811	0.749	0.00123524	CXCL9.Mono	CYFIP1
GNPTAB	5.11e-08	0.270408	0.778	0.656	0.00130515	CXCL9.Mono	GNPTAB
MTRNR2L122	5.38e-08	0.259251	1	0.989	0.00137439	CXCL9.Mono	MTRNR2L12
RNF145	5.57e-08	0.283128	0.42	0.301	0.00142181	CXCL9.Mono	RNF145
PACSIN2	5.86e-08	0.280474	0.505	0.391	0.00149711	CXCL9.Mono	PACSIN2
PLAUR1	5.94e-08	0.40607	0.979	0.973	0.0015163	CXCL9.Mono	PLAUR
C1orf54	6.07e-08	0.394966	0.357	0.246	0.00155119	CXCL9.Mono	C1orf54
RELT	6.72e-08	0.276432	0.384	0.269	0.00171533	CXCL9.Mono	RELT
FMNL11	6.77e-08	0.277223	0.751	0.659	0.00172974	CXCL9.Mono	FMNL1
UVRAG	7.31e-08	0.364699	0.468	0.379	0.00186742	CXCL9.Mono	UVRAG
PAK11	7.38e-08	0.333961	0.553	0.465	0.00188584	CXCL9.Mono	PAK1
MAX	7.51e-08	0.287313	0.613	0.53	0.00191866	CXCL9.Mono	MAX
MDM41	8.28e-08	0.260261	0.574	0.449	0.00211488	CXCL9.Mono	MDM4
TGFBR12	8.6e-08	0.289767	0.688	0.597	0.00219694	CXCL9.Mono	TGFBR1
GDI2	1.19e-07	0.250887	0.958	0.927	0.00303915	CXCL9.Mono	GDI2
CYB561A3	1.25e-07	0.310619	0.264	0.164	0.00319365	CXCL9.Mono	CYB561A3
ABI1	1.48e-07	0.257292	0.802	0.727	0.00377406	CXCL9.Mono	ABI1
PSMA5	1.51e-07	0.272975	0.916	0.887	0.0038453	CXCL9.Mono	PSMA5
IFI30	1.56e-07	0.269224	1	1	0.00398016	CXCL9.Mono	IFI30
LYSMD2	1.6e-07	0.318087	0.811	0.762	0.00409179	CXCL9.Mono	LYSMD2
MYOF	1.68e-07	0.300081	0.871	0.786	0.00430176	CXCL9.Mono	MYOF
ERBIN1	1.79e-07	0.345114	0.697	0.615	0.00458236	CXCL9.Mono	ERBIN
MAFB1	1.81e-07	0.360124	0.772	0.687	0.00463094	CXCL9.Mono	MAFB
BTG21	1.88e-07	0.588443	0.667	0.586	0.00479896	CXCL9.Mono	BTG2
CBX6	2.01e-07	0.310693	0.366	0.26	0.00513089	CXCL9.Mono	CBX6
ACSL41	2.11e-07	0.311078	0.781	0.694	0.00539614	CXCL9.Mono	ACSL4
ARAP2	2.48e-07	0.312718	0.369	0.265	0.00632809	CXCL9.Mono	ARAP2
CSGALNACT21	3.08e-07	0.297118	0.607	0.519	0.00785763	CXCL9.Mono	CSGALNACT2
BCAT12	3.13e-07	0.346512	0.526	0.413	0.00799213	CXCL9.Mono	BCAT1
HNRNPH11	3.46e-07	0.258482	0.823	0.743	0.00884062	CXCL9.Mono	HNRNPH1
ORAI21	3.5e-07	0.329328	0.495	0.397	0.00895105	CXCL9.Mono	ORAI2
SLC25A371	3.55e-07	0.397967	0.408	0.301	0.00906273	CXCL9.Mono	SLC25A37
KIFC3	3.59e-07	0.266965	0.315	0.211	0.0091739	CXCL9.Mono	KIFC3
AC004687.11	3.87e-07	0.274044	0.321	0.217	0.00989511	CXCL9.Mono	AC004687.1
DTNBP1	4.08e-07	0.277957	0.474	0.369	0.0104285	CXCL9.Mono	DTNBP1
LY75	4.12e-07	0.331725	0.492	0.408	0.0105243	CXCL9.Mono	LY75
NMI	5e-07	0.315606	0.721	0.662	0.0127756	CXCL9.Mono	NMI
CHST111	5.19e-07	0.328363	0.547	0.448	0.0132451	CXCL9.Mono	CHST11
SNHG161	5.26e-07	0.30519	0.598	0.516	0.0134313	CXCL9.Mono	SNHG16
SEC14L1	5.6e-07	0.255263	0.682	0.595	0.0142941	CXCL9.Mono	SEC14L1
ST14	5.62e-07	0.335228	0.508	0.419	0.0143485	CXCL9.Mono	ST14
GM2A	6.07e-07	0.380132	0.931	0.861	0.0155061	CXCL9.Mono	GM2A
CASP4	6.41e-07	0.309808	0.766	0.709	0.0163677	CXCL9.Mono	CASP4
IGF2R	6.41e-07	0.32054	0.952	0.87	0.0163847	CXCL9.Mono	IGF2R
MXD11	6.8e-07	0.38425	0.589	0.488	0.0173623	CXCL9.Mono	MXD1
GSN1	7.37e-07	0.26903	0.973	0.924	0.0188309	CXCL9.Mono	GSN
RBM471	7.52e-07	0.258513	0.955	0.913	0.0191977	CXCL9.Mono	RBM47
BTBD7	7.77e-07	0.270128	0.474	0.375	0.019838	CXCL9.Mono	BTBD7
PPP1R18	8.07e-07	0.279161	0.718	0.638	0.0206046	CXCL9.Mono	PPP1R18
IFITM31	8.11e-07	0.47535	0.886	0.857	0.0207241	CXCL9.Mono	IFITM3
FMNL3	8.63e-07	0.271673	0.405	0.305	0.0220373	CXCL9.Mono	FMNL3
MCUB1	9e-07	0.294408	0.658	0.581	0.0229848	CXCL9.Mono	MCUB
TLE31	1.01e-06	0.326841	0.48	0.391	0.0257164	CXCL9.Mono	TLE3
DYNLT1	1.09e-06	0.307933	0.97	0.94	0.0279381	CXCL9.Mono	DYNLT1
RALGDS1	1.12e-06	0.338126	0.508	0.425	0.0286376	CXCL9.Mono	RALGDS
TMEM109	1.2e-06	0.337848	0.441	0.355	0.0305743	CXCL9.Mono	TMEM109
CDC42SE1	1.23e-06	0.273364	0.643	0.579	0.0315272	CXCL9.Mono	CDC42SE1
TMEM138	1.3e-06	0.317068	0.318	0.222	0.0331106	CXCL9.Mono	TMEM138
LHFPL22	1.37e-06	0.308389	0.673	0.6	0.0349052	CXCL9.Mono	LHFPL2
MX21	1.4e-06	0.436782	0.426	0.329	0.0358342	CXCL9.Mono	MX2
RCN1	1.54e-06	0.283448	0.42	0.324	0.0393756	CXCL9.Mono	RCN1
CAPG	1.57e-06	0.254971	0.994	0.993	0.0401969	CXCL9.Mono	CAPG
IRF8	1.73e-06	0.304215	0.655	0.573	0.0440817	CXCL9.Mono	IRF8
BLOC1S61	1.73e-06	0.258171	0.802	0.724	0.0442421	CXCL9.Mono	BLOC1S6
NRP2	1.89e-06	0.277064	0.772	0.637	0.0483411	CXCL9.Mono	NRP2
ITGA4	1.9e-06	0.33094	0.655	0.595	0.0485955	CXCL9.Mono	ITGA4
HVCN1	2e-06	0.255884	0.526	0.43	0.0511456	CXCL9.Mono	HVCN1
2022-03-01	2.04e-06	0.257366	0.898	0.859	0.0520334	CXCL9.Mono	2022-03-01
IRF2	2.05e-06	0.25642	0.769	0.69	0.0523342	CXCL9.Mono	IRF2
MITD1	2.25e-06	0.254103	0.441	0.342	0.0573659	CXCL9.Mono	MITD1
CSF1R2	2.26e-06	0.252623	0.697	0.623	0.057846	CXCL9.Mono	CSF1R
CAMKK2	2.37e-06	0.304783	0.378	0.283	0.060561	CXCL9.Mono	CAMKK2
PHLDA21	2.49e-06	0.496919	0.366	0.277	0.0635628	CXCL9.Mono	PHLDA2
AC020916.12	2.76e-06	0.299769	0.432	0.331	0.0704244	CXCL9.Mono	AC020916.1
TUBA1A2	2.97e-06	0.250731	0.892	0.782	0.0757581	CXCL9.Mono	TUBA1A
SNCA1	3.08e-06	0.271762	0.399	0.3	0.0787893	CXCL9.Mono	SNCA
NSMAF1	3.25e-06	0.267776	0.471	0.37	0.0829084	CXCL9.Mono	NSMAF
CAMK1D	3.64e-06	0.27536	0.517	0.427	0.0929155	CXCL9.Mono	CAMK1D
BCL2A11	5.2e-06	0.392084	0.949	0.923	0.132751	CXCL9.Mono	BCL2A1
HLA-DQA2	5.54e-06	0.326376	0.742	0.713	0.141525	CXCL9.Mono	HLA-DQA2
RYBP1	5.61e-06	0.260657	0.426	0.331	0.143206	CXCL9.Mono	RYBP
ITPR1	5.69e-06	0.29854	0.429	0.339	0.145432	CXCL9.Mono	ITPR1
DMXL2	7.01e-06	0.299225	0.742	0.672	0.179082	CXCL9.Mono	DMXL2
GAB3	7.12e-06	0.252308	0.36	0.271	0.181797	CXCL9.Mono	GAB3
UTRN	7.55e-06	0.278479	0.622	0.558	0.192896	CXCL9.Mono	UTRN
CCNL1	7.57e-06	0.253115	0.676	0.591	0.19341	CXCL9.Mono	CCNL1
CMTM31	8.03e-06	0.280788	0.544	0.47	0.205004	CXCL9.Mono	CMTM3
NIN	9.43e-06	0.253864	0.685	0.618	0.240964	CXCL9.Mono	NIN
SERINC52	1.2e-05	0.256494	0.502	0.413	0.307593	CXCL9.Mono	SERINC5
GIMAP4	1.38e-05	0.337781	0.751	0.7	0.353135	CXCL9.Mono	GIMAP4
BCL11A	1.55e-05	0.313131	0.273	0.19	0.396914	CXCL9.Mono	BCL11A
GADD45B	1.71e-05	0.392859	0.435	0.344	0.435896	CXCL9.Mono	GADD45B
ATG3	2.18e-05	0.25426	0.937	0.894	0.557759	CXCL9.Mono	ATG3
BAZ1A	2.2e-05	0.328428	0.901	0.856	0.561428	CXCL9.Mono	BAZ1A
CYTH1	2.21e-05	0.278484	0.616	0.55	0.563341	CXCL9.Mono	CYTH1
PDIA6	2.25e-05	0.278729	0.973	0.947	0.573619	CXCL9.Mono	PDIA6
ARHGAP25	2.87e-05	0.267766	0.417	0.339	0.732716	CXCL9.Mono	ARHGAP25
MPEG11	2.99e-05	0.328769	0.577	0.514	0.763648	CXCL9.Mono	MPEG1
SOCS32	2.99e-05	0.378373	0.607	0.545	0.764889	CXCL9.Mono	SOCS3
SLC2A31	3.14e-05	0.282762	0.667	0.583	0.802989	CXCL9.Mono	SLC2A3
CHD4	3.24e-05	0.251937	0.694	0.622	0.827486	CXCL9.Mono	CHD4
RAB20	3.57e-05	0.291962	0.468	0.393	0.910957	CXCL9.Mono	RAB20
BHLHE401	4.07e-05	0.277842	0.853	0.779	1	CXCL9.Mono	BHLHE40
MALT1	4.8e-05	0.269366	0.375	0.29	1	CXCL9.Mono	MALT1
CUL1	5.21e-05	0.304843	0.465	0.395	1	CXCL9.Mono	CUL1
SLC43A2	5.36e-05	0.325847	0.553	0.491	1	CXCL9.Mono	SLC43A2
AC020656.11	5.56e-05	0.327393	0.946	0.912	1	CXCL9.Mono	AC020656.1
STAT2	5.57e-05	0.331222	0.514	0.464	1	CXCL9.Mono	STAT2
OPTN	5.83e-05	0.381814	0.423	0.357	1	CXCL9.Mono	OPTN
LILRA5	5.89e-05	0.316646	0.3	0.225	1	CXCL9.Mono	LILRA5
IFIH1	5.94e-05	0.381366	0.544	0.498	1	CXCL9.Mono	IFIH1
INSIG1	6.9e-05	0.298484	0.306	0.223	1	CXCL9.Mono	INSIG1
CHD11	7.03e-05	0.254096	0.655	0.604	1	CXCL9.Mono	CHD1
GNA13	0.000108121	0.255213	0.637	0.568	1	CXCL9.Mono	GNA13
PLPP3	0.000116793	0.361754	0.255	0.186	1	CXCL9.Mono	PLPP3
CREB52	0.000132866	0.250559	0.42	0.34	1	CXCL9.Mono	CREB5
FLOT11	0.000134893	0.277185	0.769	0.738	1	CXCL9.Mono	FLOT1
PLGRKT	0.000156543	0.253682	0.568	0.504	1	CXCL9.Mono	PLGRKT
KIAA0040	0.000194849	0.266805	0.267	0.199	1	CXCL9.Mono	KIAA0040
ISG152	0.000357142	0.340791	0.868	0.887	1	CXCL9.Mono	ISG15
FCN12	0.000359945	0.327261	0.438	0.362	1	CXCL9.Mono	FCN1
PLAU1	0.000395367	0.364488	0.547	0.503	1	CXCL9.Mono	PLAU
KDM6B1	0.000442332	0.398851	0.423	0.366	1	CXCL9.Mono	KDM6B
PCNX1	0.0011347	0.298843	0.48	0.428	1	CXCL9.Mono	PCNX1
CAMK2D1	0.00120971	0.269958	0.39	0.332	1	CXCL9.Mono	CAMK2D
ACP2	0.00149439	0.253903	0.435	0.384	1	CXCL9.Mono	ACP2
RTN1	0.00200481	0.251333	0.393	0.342	1	CXCL9.Mono	RTN1
APOL6	0.0022133	0.25787	0.934	0.91	1	CXCL9.Mono	APOL6
MTRNR2L13	0.00278152	0.280648	0.715	0.696	1	CXCL9.Mono	MTRNR2L1
IFI44L	0.00361229	0.324621	0.399	0.348	1	CXCL9.Mono	IFI44L
TNFSF102	0.00362762	0.718648	0.64	0.636	1	CXCL9.Mono	TNFSF10
FAM49A	0.00715893	0.252198	0.39	0.348	1	CXCL9.Mono	FAM49A
DDX58	0.00910147	0.329306	0.378	0.337	1	CXCL9.Mono	DDX58
SRGN1	0.00991664	0.253912	1	1	1	CXCL9.Mono	SRGN
LGMN	3.34e-41	1.39473	0.962	0.454	8.52e-37	CCL13.Mono	LGMN
RNASE1	3.56e-34	1.88315	0.79	0.319	9.1e-30	CCL13.Mono	RNASE1
CCL181	1.07e-30	1.8873	0.952	0.889	2.74e-26	CCL13.Mono	CCL18
CCL13	3.4e-30	1.31565	0.514	0.13	8.69e-26	CCL13.Mono	CCL13
CMKLR11	1.38e-26	0.681443	0.476	0.129	3.51e-22	CCL13.Mono	CMKLR1
GAL3ST4	5.28e-23	0.438178	0.333	0.075	1.35e-18	CCL13.Mono	GAL3ST4
MERTK	1.83e-22	0.550825	0.429	0.116	4.68e-18	CCL13.Mono	MERTK
LILRB5	4.27e-22	0.556658	0.438	0.121	1.09e-17	CCL13.Mono	LILRB5
MARCKS2	5.72e-22	1.16326	0.79	0.367	1.46e-17	CCL13.Mono	MARCKS
CTSB	2.56e-21	0.777817	1	0.999	6.54e-17	CCL13.Mono	CTSB
TMEM37	4e-20	0.479799	0.276	0.061	1.02e-15	CCL13.Mono	TMEM37
LHFPL23	6.85e-20	0.874871	0.895	0.6	1.75e-15	CCL13.Mono	LHFPL2
FPR33	7.32e-20	0.741758	1	0.719	1.87e-15	CCL13.Mono	FPR3
MAFB2	1.82e-18	0.797309	0.971	0.687	4.65e-14	CCL13.Mono	MAFB
MMP142	3.76e-18	0.610622	0.724	0.316	9.61e-14	CCL13.Mono	MMP14
CPM1	6.45e-18	1.0066	0.952	0.861	1.65e-13	CCL13.Mono	CPM
SDC2	7.68e-18	0.672801	0.495	0.168	1.96e-13	CCL13.Mono	SDC2
TRIM47	3.35e-17	0.314462	0.286	0.071	8.56e-13	CCL13.Mono	TRIM47
CTSZ	8.59e-17	0.813421	1	1	2.19e-12	CCL13.Mono	CTSZ
GLUL	1.03e-16	0.661407	1	0.999	2.64e-12	CCL13.Mono	GLUL
PMP222	1.46e-16	0.835135	0.914	0.635	3.74e-12	CCL13.Mono	PMP22
MS4A6A1	2.29e-16	0.779623	0.99	0.938	5.85e-12	CCL13.Mono	MS4A6A
SLC40A1	2.32e-16	0.789491	0.352	0.106	5.92e-12	CCL13.Mono	SLC40A1
PLTP	7.1e-16	1.04906	0.533	0.224	1.81e-11	CCL13.Mono	PLTP
GPNMB	2.95e-15	0.710976	1	0.995	7.52e-11	CCL13.Mono	GPNMB
APOE	3.46e-15	1.182	1	0.994	8.83e-11	CCL13.Mono	APOE
A2M2	9.54e-14	0.99007	0.571	0.258	2.44e-09	CCL13.Mono	A2M
CTSD1	1.65e-13	0.681507	1	1	4.22e-09	CCL13.Mono	CTSD
SERPINF11	2.06e-13	0.811273	0.41	0.159	5.26e-09	CCL13.Mono	SERPINF1
ZFP36L12	3.78e-13	0.641403	0.971	0.841	9.65e-09	CCL13.Mono	ZFP36L1
TNS1	3.78e-13	0.488776	0.505	0.215	9.66e-09	CCL13.Mono	TNS1
PLD3	1.1e-12	0.891422	0.886	0.804	2.81e-08	CCL13.Mono	PLD3
MFSD1	1.59e-12	0.563117	0.943	0.906	4.07e-08	CCL13.Mono	MFSD1
NUPR1	8.63e-12	0.797782	0.962	0.87	2.21e-07	CCL13.Mono	NUPR1
MAF	8.77e-12	0.633301	0.79	0.546	2.24e-07	CCL13.Mono	MAF
GNGT2	1.54e-11	0.361263	0.362	0.137	3.92e-07	CCL13.Mono	GNGT2
ARL4C2	1.7e-11	0.837961	0.695	0.411	4.34e-07	CCL13.Mono	ARL4C
CD842	2.58e-11	0.70008	0.81	0.533	6.6e-07	CCL13.Mono	CD84
UCP2	4.1e-11	0.625849	0.914	0.814	1.05e-06	CCL13.Mono	UCP2
CD59	4.69e-11	0.580402	0.952	0.924	1.2e-06	CCL13.Mono	CD59
ABCA11	3.97e-10	0.879403	0.667	0.418	1.01e-05	CCL13.Mono	ABCA1
EEPD1	3.99e-10	0.255791	0.276	0.094	1.02e-05	CCL13.Mono	EEPD1
SLC35F6	4.48e-10	0.500692	0.714	0.456	1.14e-05	CCL13.Mono	SLC35F6
HLA-DOA	5.95e-10	0.541895	0.705	0.445	1.52e-05	CCL13.Mono	HLA-DOA
TCN2	6.05e-10	0.336228	0.438	0.192	1.54e-05	CCL13.Mono	TCN2
SWAP701	8.83e-10	0.555215	0.781	0.519	2.25e-05	CCL13.Mono	SWAP70
FTL1	8.92e-10	0.449359	1	1	2.28e-05	CCL13.Mono	FTL
ST141	1.12e-09	0.56632	0.676	0.419	2.85e-05	CCL13.Mono	ST14
TSPAN15	1.5e-09	0.434228	0.39	0.17	3.82e-05	CCL13.Mono	TSPAN15
PSAP1	2.59e-09	0.428884	1	1	6.61e-05	CCL13.Mono	PSAP
ABI31	3.04e-09	0.373217	0.438	0.208	7.78e-05	CCL13.Mono	ABI3
DAB2	3.12e-09	0.521395	1	0.991	7.97e-05	CCL13.Mono	DAB2
SPRED11	5.31e-09	0.52102	0.867	0.708	0.000135726	CCL13.Mono	SPRED1
NR1H3	6.53e-09	0.562384	0.524	0.284	0.00016689	CCL13.Mono	NR1H3
CTSL	1.15e-08	0.57864	0.99	0.993	0.000293066	CCL13.Mono	CTSL
SLC7A8	1.95e-08	0.371387	0.429	0.209	0.000496797	CCL13.Mono	SLC7A8
AP1B1	2.23e-08	0.525474	0.648	0.42	0.000568659	CCL13.Mono	AP1B1
ADAM9	2.35e-08	0.457437	0.848	0.611	0.000599947	CCL13.Mono	ADAM9
GCHFR2	2.51e-08	0.578381	0.99	0.993	0.000641395	CCL13.Mono	GCHFR
FMN1	2.56e-08	0.250836	0.333	0.139	0.000654306	CCL13.Mono	FMN1
LAMP1	3.2e-08	0.432988	1	0.983	0.000818562	CCL13.Mono	LAMP1
AP2A2	3.49e-08	0.369755	0.581	0.338	0.000891753	CCL13.Mono	AP2A2
SMPDL3A	3.79e-08	0.440778	0.305	0.128	0.000969219	CCL13.Mono	SMPDL3A
CLIC2	3.97e-08	0.428568	0.486	0.266	0.0010151	CCL13.Mono	CLIC2
ACP21	4.27e-08	0.50823	0.619	0.383	0.00109117	CCL13.Mono	ACP2
GATM	5.91e-08	0.264716	0.286	0.114	0.00150896	CCL13.Mono	GATM
MGAT4A2	6.9e-08	0.464588	0.886	0.744	0.00176269	CCL13.Mono	MGAT4A
SIGLEC1	1.36e-07	0.431651	0.743	0.522	0.0034692	CCL13.Mono	SIGLEC1
SDC3	1.41e-07	0.341761	0.257	0.104	0.0036111	CCL13.Mono	SDC3
TMEM87B	1.46e-07	0.329463	0.533	0.29	0.00372554	CCL13.Mono	TMEM87B
SLC29A1	1.52e-07	0.402293	0.4	0.207	0.00387396	CCL13.Mono	SLC29A1
SLCO2B11	1.56e-07	0.395508	0.971	0.947	0.0039895	CCL13.Mono	SLCO2B1
SLC27A1	1.58e-07	0.250215	0.343	0.154	0.00404262	CCL13.Mono	SLC27A1
CD1631	1.75e-07	0.658147	0.933	0.907	0.00447753	CCL13.Mono	CD163
FMNL2	1.82e-07	0.501478	0.79	0.628	0.00464028	CCL13.Mono	FMNL2
LGALS12	2.2e-07	0.391858	1	1	0.00561946	CCL13.Mono	LGALS1
GAS71	2.79e-07	0.351492	0.533	0.301	0.00712097	CCL13.Mono	GAS7
ME2	3.56e-07	0.658753	0.829	0.722	0.00908757	CCL13.Mono	ME2
LIPA1	3.68e-07	0.470353	0.962	0.91	0.00939382	CCL13.Mono	LIPA
FUCA1	4.11e-07	0.616368	0.819	0.691	0.0104879	CCL13.Mono	FUCA1
CD300A1	4.26e-07	0.324423	0.457	0.243	0.0108857	CCL13.Mono	CD300A
PLXND11	4.33e-07	0.43637	0.571	0.358	0.0110472	CCL13.Mono	PLXND1
PXDC1	4.37e-07	0.274272	0.4	0.199	0.0111731	CCL13.Mono	PXDC1
GPR34	4.43e-07	0.356373	0.571	0.343	0.0113213	CCL13.Mono	GPR34
TGFBI2	4.85e-07	0.452308	0.99	0.912	0.0123941	CCL13.Mono	TGFBI
SNX24	4.97e-07	0.380221	0.619	0.392	0.0127064	CCL13.Mono	SNX24
KLHDC8B	5.31e-07	0.342413	0.39	0.199	0.0135706	CCL13.Mono	KLHDC8B
PDK4	5.42e-07	0.47443	0.771	0.586	0.0138475	CCL13.Mono	PDK4
BMP2K1	6.34e-07	0.51715	0.743	0.603	0.0162042	CCL13.Mono	BMP2K
CAMK2D2	7.11e-07	0.409428	0.543	0.332	0.0181535	CCL13.Mono	CAMK2D
C1QB2	7.32e-07	0.424238	1	0.997	0.0186879	CCL13.Mono	C1QB
SAMD4A	8e-07	0.267337	0.276	0.119	0.0204218	CCL13.Mono	SAMD4A
C1orf541	8.17e-07	0.521674	0.448	0.247	0.0208583	CCL13.Mono	C1orf54
STAT5A	9.33e-07	0.360774	0.619	0.391	0.0238187	CCL13.Mono	STAT5A
PLXNC13	9.33e-07	0.379204	0.429	0.221	0.023836	CCL13.Mono	PLXNC1
SGSH	1.17e-06	0.265139	0.257	0.111	0.0298831	CCL13.Mono	SGSH
MPP1	1.39e-06	0.380323	0.819	0.637	0.0354891	CCL13.Mono	MPP1
SGK13	1.42e-06	0.374941	0.838	0.625	0.036221	CCL13.Mono	SGK1
CCL24	1.47e-06	1.01142	0.457	0.257	0.0375294	CCL13.Mono	CCL2
KCTD123	1.55e-06	0.32201	0.981	0.956	0.039473	CCL13.Mono	KCTD12
AHR3	1.88e-06	0.396794	0.914	0.769	0.0479949	CCL13.Mono	AHR
ADAP2	2.12e-06	0.473558	0.79	0.594	0.0541987	CCL13.Mono	ADAP2
C1QC2	2.64e-06	0.348516	1	0.995	0.0674561	CCL13.Mono	C1QC
TDP2	2.99e-06	0.288689	0.638	0.387	0.0763222	CCL13.Mono	TDP2
LAPTM51	3.05e-06	0.289755	1	0.997	0.077966	CCL13.Mono	LAPTM5
TUBA1C	3.36e-06	0.437777	0.867	0.745	0.0857151	CCL13.Mono	TUBA1C
RAD51AP1	3.53e-06	0.314626	0.276	0.13	0.0902126	CCL13.Mono	RAD51AP1
PRNP1	3.79e-06	0.465529	0.79	0.663	0.0967176	CCL13.Mono	PRNP
WIPI1	3.98e-06	0.290454	0.362	0.191	0.10175	CCL13.Mono	WIPI1
LILRB42	4.01e-06	0.421663	0.552	0.355	0.102312	CCL13.Mono	LILRB4
GPR137B	4.23e-06	0.298106	0.781	0.561	0.108026	CCL13.Mono	GPR137B
CD41	4.67e-06	0.407259	0.838	0.766	0.119287	CCL13.Mono	CD4
GPR1833	4.74e-06	0.251115	0.381	0.192	0.121165	CCL13.Mono	GPR183
HAVCR21	5.7e-06	0.311618	0.81	0.655	0.145606	CCL13.Mono	HAVCR2
RGS11	5.78e-06	0.500317	0.524	0.322	0.147707	CCL13.Mono	RGS1
KCNMA11	6.76e-06	0.454141	0.638	0.441	0.172709	CCL13.Mono	KCNMA1
FCHO2	6.96e-06	0.497386	0.714	0.586	0.177672	CCL13.Mono	FCHO2
C2	7.16e-06	0.678536	0.59	0.458	0.183003	CCL13.Mono	C2
FARP1	7.6e-06	0.332575	0.419	0.238	0.194083	CCL13.Mono	FARP1
CD36	7.7e-06	0.572974	0.552	0.384	0.196555	CCL13.Mono	CD36
GNB42	8.19e-06	0.34061	0.886	0.834	0.209312	CCL13.Mono	GNB4
TSPAN4	8.29e-06	0.497645	0.8	0.663	0.211814	CCL13.Mono	TSPAN4
GM2A1	8.84e-06	0.346304	0.924	0.863	0.225818	CCL13.Mono	GM2A
ABHD121	8.84e-06	0.382626	0.667	0.464	0.225821	CCL13.Mono	ABHD12
FRMD4A1	9.31e-06	0.36609	0.771	0.59	0.237833	CCL13.Mono	FRMD4A
FN12	9.64e-06	0.572442	0.952	0.955	0.24614	CCL13.Mono	FN1
ME1	1.04e-05	0.269347	0.314	0.159	0.264586	CCL13.Mono	ME1
ST8SIA41	1.22e-05	0.354971	0.39	0.222	0.310817	CCL13.Mono	ST8SIA4
CTTNBP2NL	1.33e-05	0.299911	0.552	0.359	0.340373	CCL13.Mono	CTTNBP2NL
CD2761	1.64e-05	0.341635	0.552	0.349	0.417677	CCL13.Mono	CD276
TMEM43	1.76e-05	0.317868	0.59	0.4	0.449323	CCL13.Mono	TMEM43
IFI27	1.98e-05	1.21854	0.4	0.251	0.506256	CCL13.Mono	IFI27
CXCL21	2.04e-05	0.528778	0.514	0.334	0.521025	CCL13.Mono	CXCL2
LACC1	2.47e-05	0.444091	0.476	0.319	0.62972	CCL13.Mono	LACC1
FCGR3A1	2.79e-05	0.334447	1	0.993	0.713645	CCL13.Mono	FCGR3A
RMDN31	2.85e-05	0.445749	0.857	0.863	0.728784	CCL13.Mono	RMDN3
CD991	3.26e-05	0.327468	0.962	0.926	0.832575	CCL13.Mono	CD99
TTYH31	3.33e-05	0.395133	0.457	0.289	0.851598	CCL13.Mono	TTYH3
SCARB2	3.38e-05	0.34305	0.933	0.925	0.86337	CCL13.Mono	SCARB2
PRCP	3.92e-05	0.378899	0.619	0.431	1	CCL13.Mono	PRCP
ATP2B4	4.31e-05	0.276145	0.39	0.224	1	CCL13.Mono	ATP2B4
COLGALT1	5e-05	0.307654	0.876	0.769	1	CCL13.Mono	COLGALT1
ITGAV2	5.24e-05	0.293268	0.695	0.483	1	CCL13.Mono	ITGAV
BCAT13	5.27e-05	0.28465	0.629	0.414	1	CCL13.Mono	BCAT1
CXXC5	5.38e-05	0.257675	0.581	0.366	1	CCL13.Mono	CXXC5
IDH1	5.6e-05	0.38137	0.81	0.717	1	CCL13.Mono	IDH1
TCF41	5.63e-05	0.271729	0.486	0.298	1	CCL13.Mono	TCF4
TUBB1	5.63e-05	0.345861	0.981	0.969	1	CCL13.Mono	TUBB
TLR4	5.7e-05	0.338711	0.829	0.762	1	CCL13.Mono	TLR4
FILIP1L1	5.7e-05	0.326006	0.59	0.416	1	CCL13.Mono	FILIP1L
HIF1A2	5.84e-05	0.287337	0.762	0.592	1	CCL13.Mono	HIF1A
CYFIP11	6.04e-05	0.383364	0.857	0.75	1	CCL13.Mono	CYFIP1
LMNA2	6.29e-05	0.55054	0.952	0.948	1	CCL13.Mono	LMNA
GADD45G	7.21e-05	0.29048	0.305	0.162	1	CCL13.Mono	GADD45G
FYB12	7.36e-05	0.458849	0.867	0.88	1	CCL13.Mono	FYB1
DNAJC5	7.67e-05	0.332627	0.505	0.347	1	CCL13.Mono	DNAJC5
ELL2	8.58e-05	0.284935	0.638	0.437	1	CCL13.Mono	ELL2
CCR11	8.79e-05	0.43669	0.8	0.712	1	CCL13.Mono	CCR1
CAPNS1	0.000101958	0.257646	0.962	0.922	1	CCL13.Mono	CAPNS1
PLEKHO2	0.000106408	0.366661	0.695	0.561	1	CCL13.Mono	PLEKHO2
VAMP51	0.000112213	0.396848	0.61	0.434	1	CCL13.Mono	VAMP5
SETD7	0.000114377	0.27999	0.486	0.315	1	CCL13.Mono	SETD7
DST1	0.000119031	0.35972	0.914	0.889	1	CCL13.Mono	DST
CNDP2	0.000121823	0.303478	0.867	0.822	1	CCL13.Mono	CNDP2
IDH21	0.000130732	0.301792	0.543	0.373	1	CCL13.Mono	IDH2
INF2	0.000131661	0.29633	0.457	0.287	1	CCL13.Mono	INF2
ZBTB4	0.000132449	0.266758	0.495	0.315	1	CCL13.Mono	ZBTB4
FAM20C	0.000147706	0.276784	0.362	0.207	1	CCL13.Mono	FAM20C
ORAI11	0.000162302	0.380639	0.705	0.561	1	CCL13.Mono	ORAI1
GNA131	0.000176558	0.276324	0.743	0.569	1	CCL13.Mono	GNA13
LILRB22	0.000178717	0.310836	0.514	0.34	1	CCL13.Mono	LILRB2
NPL	0.000179929	0.320524	0.676	0.489	1	CCL13.Mono	NPL
APOC11	0.000230323	0.343948	1	1	1	CCL13.Mono	APOC1
SEC13	0.000239021	0.299735	0.581	0.414	1	CCL13.Mono	SEC13
SPIN1	0.00025282	0.2775	0.61	0.445	1	CCL13.Mono	SPIN1
NAGLU	0.000253352	0.277252	0.495	0.326	1	CCL13.Mono	NAGLU
PLEKHA21	0.000318385	0.280603	0.714	0.519	1	CCL13.Mono	PLEKHA2
STRN3	0.00032739	0.263929	0.505	0.344	1	CCL13.Mono	STRN3
AOAH1	0.000330001	0.35123	0.381	0.237	1	CCL13.Mono	AOAH
P2RX4	0.000358273	0.301625	0.676	0.527	1	CCL13.Mono	P2RX4
SERINC2	0.000378185	0.263842	0.381	0.238	1	CCL13.Mono	SERINC2
RPN1	0.000401363	0.289876	0.829	0.766	1	CCL13.Mono	RPN1
ATP6V0A1	0.000410821	0.276523	0.657	0.492	1	CCL13.Mono	ATP6V0A1
SLC15A4	0.000414609	0.260305	0.552	0.393	1	CCL13.Mono	SLC15A4
SPINT11	0.000430274	0.316421	0.486	0.313	1	CCL13.Mono	SPINT1
LINC01094	0.000471215	0.315762	0.657	0.504	1	CCL13.Mono	LINC01094
CTSA	0.000480338	0.297451	0.981	0.882	1	CCL13.Mono	CTSA
GNA12	0.000526756	0.283959	0.495	0.34	1	CCL13.Mono	GNA12
WIPF12	0.000574074	0.272184	0.857	0.741	1	CCL13.Mono	WIPF1
HMOX1	0.00060462	0.330406	0.848	0.828	1	CCL13.Mono	HMOX1
PHLDA11	0.000610193	0.358359	0.352	0.223	1	CCL13.Mono	PHLDA1
PREX12	0.000649523	0.338658	0.61	0.472	1	CCL13.Mono	PREX1
PLA2G15	0.000691685	0.290074	0.571	0.427	1	CCL13.Mono	PLA2G15
CAND1	0.000787678	0.284278	0.61	0.441	1	CCL13.Mono	CAND1
MSR11	0.000800185	0.255402	1	0.993	1	CCL13.Mono	MSR1
GLMP	0.000831172	0.295399	0.505	0.375	1	CCL13.Mono	GLMP
RHOC1	0.000898971	0.279674	0.533	0.371	1	CCL13.Mono	RHOC
MPEG12	0.000943883	0.313821	0.676	0.514	1	CCL13.Mono	MPEG1
FRMD4B	0.000954192	0.291485	0.629	0.475	1	CCL13.Mono	FRMD4B
GBA	0.00100766	0.302977	0.533	0.399	1	CCL13.Mono	GBA
LINC02611	0.00100965	0.276463	0.257	0.152	1	CCL13.Mono	LINC02611
TMEM176B1	0.00108572	0.404725	0.848	0.698	1	CCL13.Mono	TMEM176B
NSFL1C	0.00117496	0.276479	0.524	0.378	1	CCL13.Mono	NSFL1C
SLC39A81	0.00121223	0.280128	0.267	0.15	1	CCL13.Mono	SLC39A8
NAGA	0.0012899	0.327021	0.638	0.53	1	CCL13.Mono	NAGA
MMP191	0.00143862	0.306103	0.41	0.275	1	CCL13.Mono	MMP19
EMP12	0.0014429	0.314147	0.619	0.469	1	CCL13.Mono	EMP1
DMXL21	0.00145309	0.253588	0.8	0.673	1	CCL13.Mono	DMXL2
[truncated: 1,930 more rows]
